# Supplementary material
Source: Research Square preprint supplement (doi:10.21203/rs.3.rs-9566914/v1)
Supplement: Supplementary file 1 [file 1b51f14d97bfaeaefee0f74f.docx]

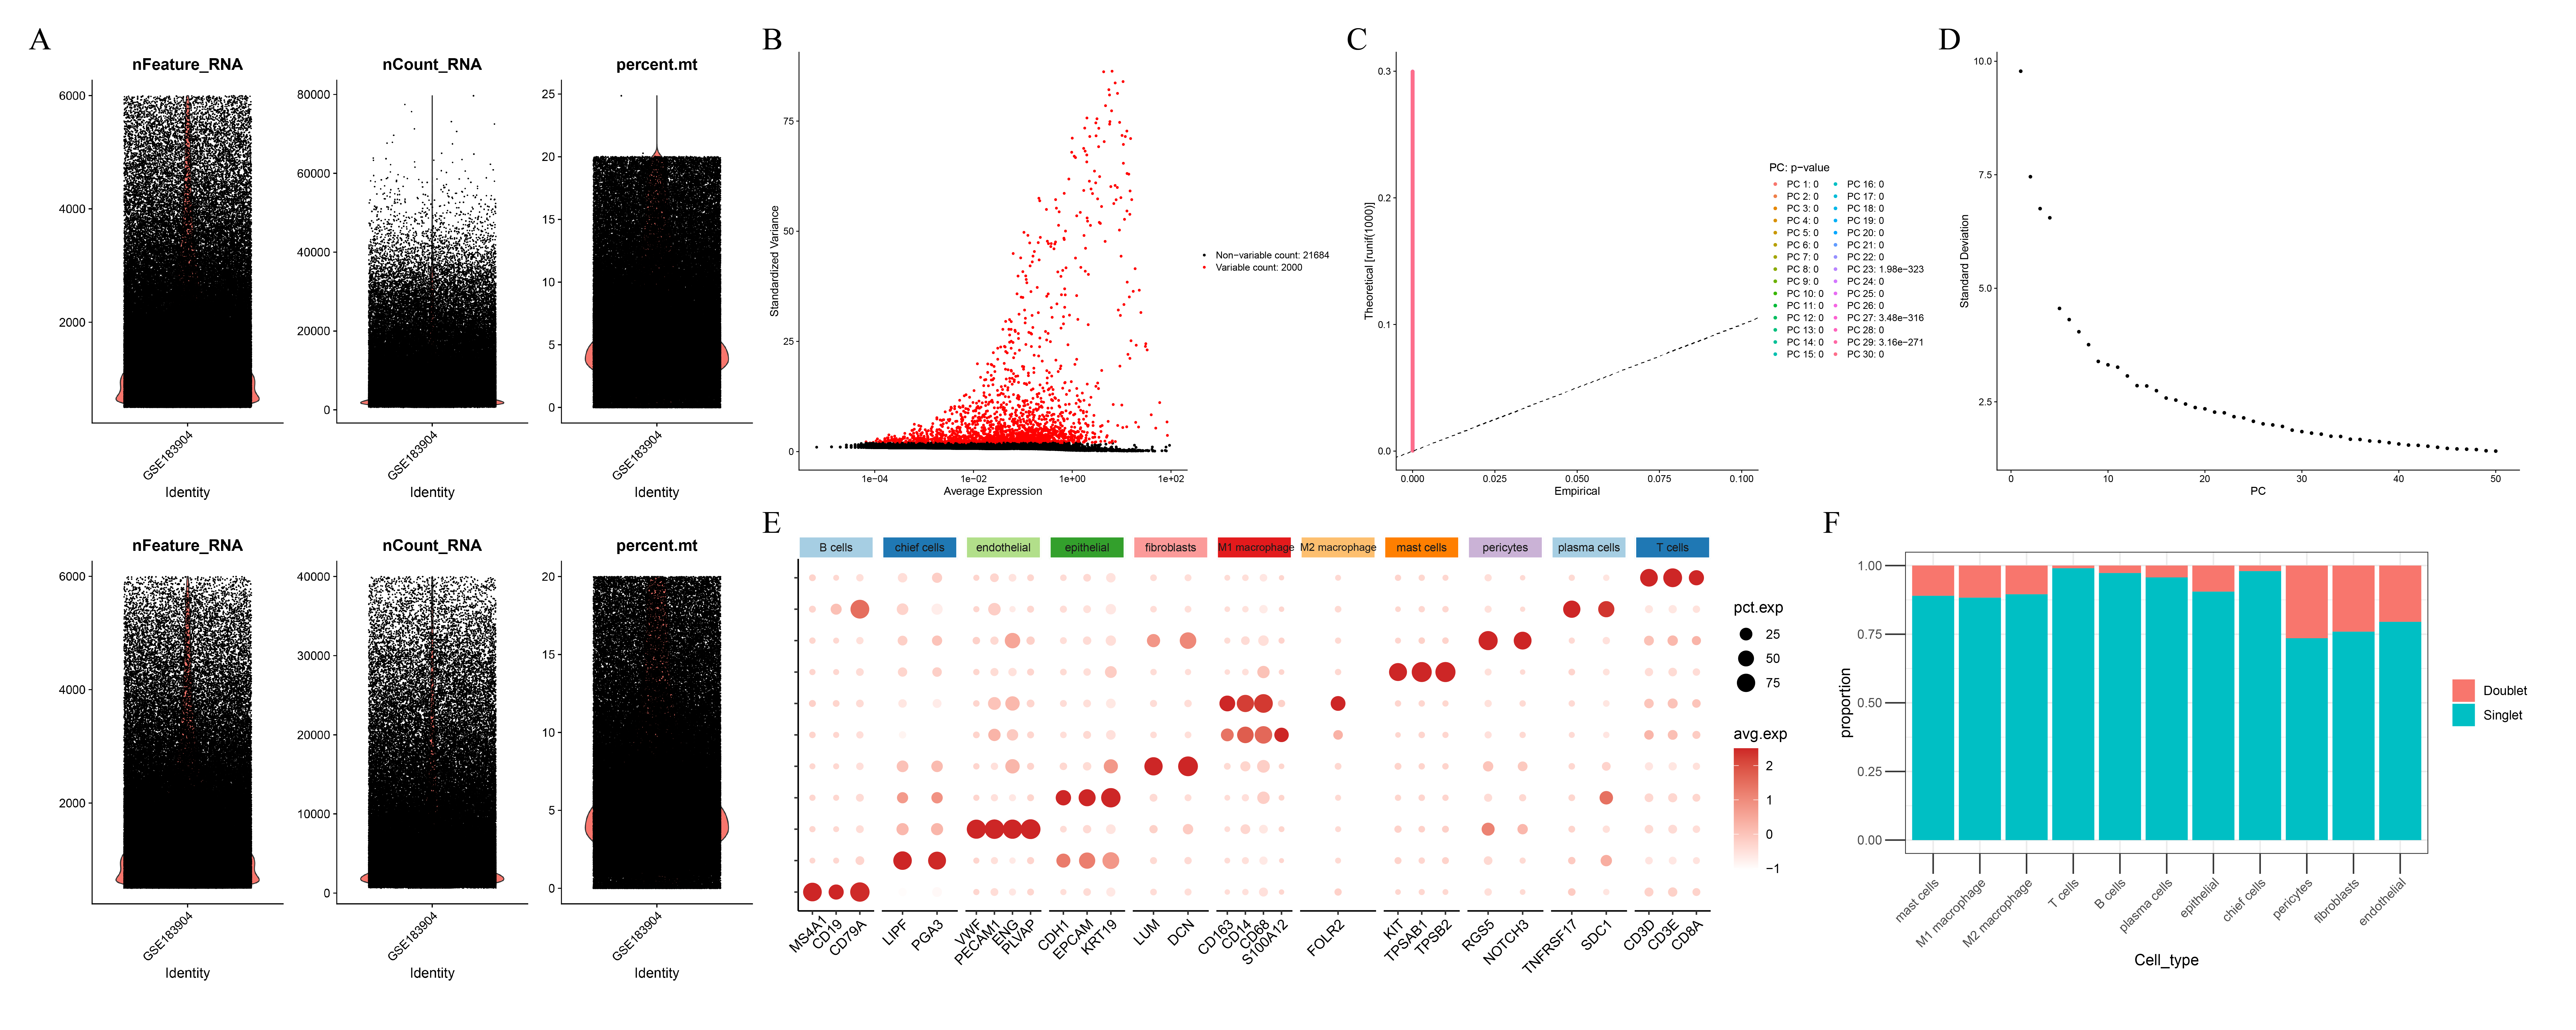


**Figure S1** Single-cell RNA sequencing (scRNA-seq) data processing(**A**) scRNA-seq data before (up) and after (down) quality control. (**B**) Selection of top 2,000 highly variable genes (HVGs). (**C**) Permutation test of principal components (PCs). (**D**) Elbow plot of PCs. (**E**) Expression of marker genes in the main cell types. (**F**) The proportion of double cells among various cell types.
