# Supplementary material
Source: Research Square preprint supplement (doi:10.21203/rs.3.rs-9566914/v1)
Supplement: Supplementary file 2 [file 6645d348267fada2162abf6c.xlsx]

## Sheet: GO_venn_enrich
ONTOLOGY	ID	Description	GeneRatio	BgRatio	pvalue	p.adjust	qvalue	geneID	Count
BP	GO:0003012	muscle system process	75/941	459/18888	4.96190983832417e-20	2.50477208638604e-16	2.13675506827202e-16	GSN/CKMT2/KCNA5/COMP/EHD3/NR4A3/SCNN1B/TIAM1/ADRB2/P2RY1/TPM1/ACACB/PI16/GHRL/CRYAB/SMTN/DMPK/MYL9/TNNC1/SGCA/SLMAP/SORBS2/TMOD1/CACNB2/PLN/SCN7A/TPM2/ATP1A2/RYR3/CTNNA3/DMD/PDE5A/CASQ2/MEIS1/AKAP6/ATP2B4/LMOD1/FLNA/KIT/APBB1/GNAO1/CACNA1H/ACTA2/ANK2/CALD1/MYH11/FBXO32/SYNM/RYR2/ALDOA/MYLK/CHRM2/MYOCD/HAND2/GJC1/KCNMA1/CNN1/PTGER3/CAV1/PPP1R12B/CHRNB4/TACR2/SLC8A1/TNNI2/KCNE4/SCN4B/DES/DTNA/RGS4/…	75
BP	GO:0006936	muscle contraction	63/941	355/18888	7.7417339133285e-19	1.95401363972411e-15	1.66691754944352e-15	GSN/CKMT2/KCNA5/COMP/EHD3/SCNN1B/ADRB2/TPM1/GHRL/CRYAB/SMTN/DMPK/MYL9/TNNC1/SGCA/SLMAP/TMOD1/CACNB2/PLN/SCN7A/TPM2/ATP1A2/RYR3/CTNNA3/DMD/PDE5A/CASQ2/ATP2B4/LMOD1/FLNA/KIT/APBB1/GNAO1/CACNA1H/ACTA2/ANK2/CALD1/MYH11/SYNM/RYR2/ALDOA/MYLK/CHRM2/MYOCD/GJC1/KCNMA1/CNN1/PTGER3/CAV1/PPP1R12B/CHRNB4/TACR2/SLC8A1/TNNI2/KCNE4/SCN4B/DES/DTNA/ABCC9/GAMT/TACR1/CHGA/CHRNA3	63
BP	GO:1903522	regulation of blood circulation	42/941	262/18888	1.77905340618429e-11	2.99355386480611e-08	2.55372192445612e-08	KCNA5/EHD3/HRH2/TPM1/GHRL/HOPX/ATP1B2/DMPK/CACNB2/PLN/ATP1A2/CTNNA3/DMD/PDE5A/CASQ2/ATP2B4/FLNA/CYSLTR1/CACNA1H/ANK2/BVES/RYR2/CELF2/POPDC2/CHRM2/ADRA1D/TRPC1/GJC1/CAV1/SLC8A1/HSPB7/AGTR1/ISL1/ITGA9/KCNE4/SCN4B/SLC8A2/DES/RGS4/ABCC9/TACR1/CHGA	42
BP	GO:0060047	heart contraction	40/941	249/18888	5.05530107383999e-11	6.13803294016903e-08	5.23619416928674e-08	GSN/KCNA5/EHD3/TPM1/HOPX/ATP1B2/DMPK/TNNC1/CACNB2/PLN/SCN7A/ATP1A2/CTNNA3/DMD/PDE5A/CASQ2/ATP2B4/FLNA/CACNA1H/ANK2/BVES/ACTC1/RYR2/CELF2/POPDC2/CHRM2/TRPC1/GJC1/CAV1/SLC8A1/HSPB7/ISL1/TNNI2/KCNE4/SCN4B/SLC8A2/DES/RGS4/ABCC9/CHGA	40
BP	GO:0042391	regulation of membrane potential	57/941	446/18888	6.07966812615791e-11	6.13803294016903e-08	5.23619416928674e-08	KCNA5/EHD3/ADRB2/PRKN/CD36/GHRL/ATP1B2/FHL1/DMPK/INSYN1/KCNB1/SLMAP/CACNB2/PLN/SCN7A/ATP1A2/CTNNA3/DMD/CASQ2/AKAP6/FLNA/DCN/CACNA1H/ANK2/GRIK5/BVES/LRRK2/SPART/PID1/MAPT/RYR2/POPDC2/KCNA2/GJC1/KCNMA1/CAV1/CHRNB4/SLC8A1/NLGN1/SLC26A3/RIMS3/KCNE4/GRIN2A/SCN4B/SLC8A2/GLRB/RELN/KCNK3/GABRP/RIMS1/KCNK9/RGS4/ABCC9/KCNH3/CNR1/TACR1/CHRNA3	57
BP	GO:0003015	heart process	40/941	260/18888	1.9507650210736e-10	1.608230587777e-07	1.37193913891811e-07	GSN/KCNA5/EHD3/TPM1/HOPX/ATP1B2/DMPK/TNNC1/CACNB2/PLN/SCN7A/ATP1A2/CTNNA3/DMD/PDE5A/CASQ2/ATP2B4/FLNA/CACNA1H/ANK2/BVES/ACTC1/RYR2/CELF2/POPDC2/CHRM2/TRPC1/GJC1/CAV1/SLC8A1/HSPB7/ISL1/TNNI2/KCNE4/SCN4B/SLC8A2/DES/RGS4/ABCC9/CHGA	40
BP	GO:0008016	regulation of heart contraction	35/941	208/18888	2.23011373106953e-10	1.608230587777e-07	1.37193913891811e-07	KCNA5/EHD3/TPM1/HOPX/ATP1B2/DMPK/CACNB2/PLN/ATP1A2/CTNNA3/DMD/PDE5A/CASQ2/ATP2B4/FLNA/CACNA1H/ANK2/BVES/RYR2/CELF2/POPDC2/CHRM2/TRPC1/GJC1/CAV1/SLC8A1/HSPB7/ISL1/KCNE4/SCN4B/SLC8A2/DES/RGS4/ABCC9/CHGA	35
BP	GO:0090257	regulation of muscle system process	37/941	245/18888	1.5845357195184e-09	9.99842039016109e-07	8.5293889849339e-07	EHD3/NR4A3/ADRB2/TPM1/ACACB/PI16/GHRL/DMPK/MYL9/TNNC1/SGCA/PLN/ATP1A2/CTNNA3/DMD/PDE5A/CASQ2/AKAP6/ATP2B4/KIT/ANK2/FBXO32/RYR2/CHRM2/MYOCD/HAND2/CNN1/CAV1/PPP1R12B/CHRNB4/TACR2/SLC8A1/RGS4/TACR1/CHGA/CHRNA3/GATA5	37
BP	GO:0006939	smooth muscle contraction	23/941	108/18888	2.68308064106608e-09	1.50491011956684e-06	1.28379916989489e-06	COMP/SCNN1B/ADRB2/GHRL/SMTN/ATP1A2/ATP2B4/KIT/APBB1/ACTA2/MYH11/MYLK/CHRM2/MYOCD/KCNMA1/CNN1/PTGER3/CAV1/CHRNB4/TACR2/SLC8A1/TACR1/CHRNA3	23
BP	GO:0061337	cardiac conduction	21/941	99/18888	1.41146025176616e-08	7.1250513509156e-06	6.07819356839514e-06	KCNA5/EHD3/ATP1B2/CACNB2/PLN/ATP1A2/CTNNA3/CASQ2/ATP2B4/FLNA/ANK2/RYR2/TRPC1/GJC1/CAV1/SLC8A1/ISL1/KCNE4/SCN4B/SLC8A2/ABCC9	21
BP	GO:0045229	external encapsulating structure organization	42/941	334/18888	3.32118085022576e-08	1.52412008472179e-05	1.30018668500226e-05	FAP/DPT/GPM6B/SPINK5/MMP7/COMP/VIT/ADAMTSL1/ADAMTS1/OLFML2B/COL4A6/FGFR4/THSD4/TGM1/FOXF2/FOXF1/ABI3BP/TGFBR3/P3H4/MMP1/COL23A1/FKBP10/ITGA8/SMOC2/TNXB/COL8A1/RECK/ADAMTSL4/ADAMTSL3/MFAP4/MYH11/ADTRP/PTX3/CAV1/FBLN1/ADAMTS15/ADAMTS8/MMP28/VTN/IL6/COL17A1/KLK7	42
BP	GO:0006937	regulation of muscle contraction	27/941	167/18888	6.03299831556987e-08	2.53788129141639e-05	2.16499965868389e-05	EHD3/ADRB2/TPM1/GHRL/DMPK/MYL9/TNNC1/PLN/ATP1A2/CTNNA3/DMD/PDE5A/CASQ2/KIT/ANK2/RYR2/CHRM2/MYOCD/CNN1/CAV1/PPP1R12B/CHRNB4/TACR2/SLC8A1/TACR1/CHGA/CHRNA3	27
BP	GO:0030198	extracellular matrix organization	41/941	332/18888	8.02083553254862e-08	2.93435437170938e-05	2.50322039675183e-05	FAP/DPT/GPM6B/SPINK5/MMP7/COMP/VIT/ADAMTSL1/ADAMTS1/OLFML2B/COL4A6/FGFR4/THSD4/FOXF2/FOXF1/ABI3BP/TGFBR3/P3H4/MMP1/COL23A1/FKBP10/ITGA8/SMOC2/TNXB/COL8A1/RECK/ADAMTSL4/ADAMTSL3/MFAP4/MYH11/ADTRP/PTX3/CAV1/FBLN1/ADAMTS15/ADAMTS8/MMP28/VTN/IL6/COL17A1/KLK7	41
BP	GO:0006941	striated muscle contraction	29/941	191/18888	8.14862713052378e-08	2.93435437170938e-05	2.50322039675183e-05	GSN/KCNA5/EHD3/TPM1/DMPK/TNNC1/CACNB2/PLN/SCN7A/ATP1A2/RYR3/CTNNA3/DMD/PDE5A/CASQ2/FLNA/ANK2/SYNM/RYR2/ALDOA/GJC1/CAV1/SLC8A1/TNNI2/KCNE4/SCN4B/DTNA/ABCC9/CHGA	29
BP	GO:0043062	extracellular structure organization	41/941	333/18888	8.71935728519032e-08	2.93435437170938e-05	2.50322039675183e-05	FAP/DPT/GPM6B/SPINK5/MMP7/COMP/VIT/ADAMTSL1/ADAMTS1/OLFML2B/COL4A6/FGFR4/THSD4/FOXF2/FOXF1/ABI3BP/TGFBR3/P3H4/MMP1/COL23A1/FKBP10/ITGA8/SMOC2/TNXB/COL8A1/RECK/ADAMTSL4/ADAMTSL3/MFAP4/MYH11/ADTRP/PTX3/CAV1/FBLN1/ADAMTS15/ADAMTS8/MMP28/VTN/IL6/COL17A1/KLK7	41
BP	GO:0003018	vascular process in circulatory system	36/941	275/18888	1.15460378996749e-07	3.64277495734742e-05	3.10755533207697e-05	KAT2B/KCNA5/COMP/SCNN1B/HRH2/ADRB2/SLC5A6/P2RY1/CD36/BMP6/ATP1B2/NPR1/PDE2A/SLC2A4/ATP1A2/KCNMB1/SLC16A7/FERMT2/ATP2B4/CYSLTR1/ACTA2/ADRA1D/KCNMA1/CAV1/TACR2/SLC8A1/AKAP12/SOD3/AGTR1/PDE3A/SLIT2/ITGA9/SLC8A2/HTR1B/ABCC9/TACR1	36
BP	GO:0042692	muscle cell differentiation	48/941	428/18888	1.29933636529683e-07	3.85826468942258e-05	3.29138394453828e-05	NEB/CDK1/CXCL9/COMP/CXCL10/TPM1/PI16/HOPX/FOXF1/DMPK/JAM2/MYL9/LBX2/PDGFRB/CSRP1/RORA/RBPMS2/SORBS2/TMOD1/ITGA8/MYOM1/PGM5/CFL2/DMD/MEIS1/AKAP6/LMOD1/KIT/ASB2/LDB3/CACNA1H/ANK2/BVES/SPEG/CDON/MYH11/ACTC1/PLPP7/POPDC2/RBM24/MYOCD/ZEB1/SLC8A1/ISL1/FLNC/ADAMTS15/FGF10/RGS4	48
BP	GO:0060048	cardiac muscle contraction	24/941	145/18888	2.06700036894083e-07	5.79678770134072e-05	4.94508684756545e-05	GSN/KCNA5/EHD3/TPM1/TNNC1/CACNB2/PLN/SCN7A/ATP1A2/CTNNA3/DMD/PDE5A/CASQ2/FLNA/ANK2/RYR2/GJC1/CAV1/SLC8A1/TNNI2/KCNE4/SCN4B/ABCC9/CHGA	24
BP	GO:0001508	action potential	24/941	149/18888	3.47822259396407e-07	9.24108823912139e-05	7.88332888194294e-05	KCNA5/CD36/KCNB1/SLMAP/CACNB2/SCN7A/ATP1A2/CTNNA3/DMD/AKAP6/FLNA/ANK2/RYR2/KCNA2/GJC1/CAV1/CHRNB4/SLC8A1/KCNE4/SCN4B/SLC8A2/ABCC9/CNR1/TACR1	24
BP	GO:0050804	modulation of chemical synaptic transmission	51/941	493/18888	6.5339714915841e-07	0.000161536769817083	0.000137802761973828	LRRC4/S100B/PTN/FAM107A/ADRB2/P2RY1/PRKN/GHRL/PLCL1/DMPK/MME/KCNB1/CPLX1/CDC20/EPHA7/ATP1A2/PRKAR2B/CDH11/KIT/PRRT1/PLPPR4/GRIK5/LRRK2/MAPT/ROR2/MAP1B/FRRS1L/BCHE/CHRDL1/CHRM2/PTPRS/SNCG/CHRNB4/TACR2/PRKCB/AKAP12/NLGN1/TSHZ3/RIMS3/UNC13A/GRIN2A/DGKI/SLC8A2/RELN/HTR1B/RIMS1/RGS4/CACNG4/CNR1/TACR1/CHRNA3	51
BP	GO:0099177	regulation of trans-synaptic signaling	51/941	494/18888	6.94530300736373e-07	0.000161536769817083	0.000137802761973828	LRRC4/S100B/PTN/FAM107A/ADRB2/P2RY1/PRKN/GHRL/PLCL1/DMPK/MME/KCNB1/CPLX1/CDC20/EPHA7/ATP1A2/PRKAR2B/CDH11/KIT/PRRT1/PLPPR4/GRIK5/LRRK2/MAPT/ROR2/MAP1B/FRRS1L/BCHE/CHRDL1/CHRM2/PTPRS/SNCG/CHRNB4/TACR2/PRKCB/AKAP12/NLGN1/TSHZ3/RIMS3/UNC13A/GRIN2A/DGKI/SLC8A2/RELN/HTR1B/RIMS1/RGS4/CACNG4/CNR1/TACR1/CHRNA3	51
BP	GO:0070252	actin-mediated cell contraction	20/941	113/18888	7.04003354987288e-07	0.000161536769817083	0.000137802761973828	GSN/KCNA5/TPM1/TNNC1/CACNB2/PLN/SCN7A/ATP1A2/CTNNA3/FLNA/ACTA2/ANK2/FRMD6/ACTC1/RYR2/GJC1/CAV1/KCNE4/SCN4B/ABCC9	20
BP	GO:0140014	mitotic nuclear division	34/941	277/18888	1.17143697125534e-06	0.000257104949169434	0.000219329457638701	TPX2/TRIP13/NDC80/NUF2/KAT2B/NEK2/SKA3/CDK1/MAD2L1/TOM1L2/TTK/UBE2C/MYBL2/AURKA/SKA1/PKMYT1/PRC1/KNSTRN/BTC/CHEK2/DUSP1/KIFC1/ZWINT/CCNB1/RCC1/CDC25C/AURKB/PDGFRB/CDT1/CDC20/SPC24/UBE2S/PSRC1/FLNA	34
BP	GO:0007088	regulation of mitotic nuclear division	20/941	118/18888	1.43248205792098e-06	0.000301298726182713	0.00025703000434012	TRIP13/NDC80/NUF2/NEK2/MAD2L1/TOM1L2/TTK/UBE2C/AURKA/PKMYT1/BTC/DUSP1/ZWINT/CCNB1/RCC1/CDC25C/AURKB/PDGFRB/CDC20/SPC24	20
BP	GO:0007517	muscle organ development	40/941	359/18888	1.70047364721767e-06	0.00033015349889057	0.000281645250638361	NEB/HLF/CXCL10/SOX15/TPM1/CRYAB/SMTN/FHL1/TGFBR3/KY/TNNC1/SGCA/MYOM1/SVIL/CFL2/DMD/POU6F1/TAGLN/ASB2/CACNA1H/BVES/HEYL/SPEG/CDON/ACTC1/TCF21/JPH2/RYR2/ZFPM2/POPDC2/RBM24/MYLK/MYOCD/ITGA7/EGR3/CAV1/COL6A3/ISL1/DES/MKX	40
BP	GO:0031589	cell-substrate adhesion	40/941	359/18888	1.70047364721767e-06	0.00033015349889057	0.000281645250638361	GPM6B/LYVE1/VIT/FAM107A/TIAM1/CD36/MSLN/CDKN2A/LYPD3/FOXF1/ABI3BP/ATP1B2/LIMS2/STON1/FAT2/APOA1/ITGA8/SRCIN1/TNXB/COL8A1/CDH11/SFRP1/ACER2/FERMT2/FLNA/SORBS1/RADIL/BVES/JAM3/ITGB7/ITGA7/CORO2B/FBLN1/ITGA9/MADCAM1/RAC3/ITGBL1/VTN/CCL25/COL17A1	40
BP	GO:0033047	regulation of mitotic sister chromatid segregation	13/941	54/18888	1.77056104628106e-06	0.000331029339319511	0.000282392407030636	TRIP13/NDC80/NUF2/KAT2B/CDK1/MAD2L1/TTK/DUSP1/ZWINT/CCNB1/AURKB/CDC20/SPC24	13
BP	GO:0000070	mitotic sister chromatid segregation	26/941	188/18888	2.3271646746085e-06	0.000419554545622276	0.000357910927963285	TPX2/TRIP13/NDC80/NUF2/KAT2B/NEK2/SKA3/CDK1/MAD2L1/TTK/UBE2C/MYBL2/SKA1/PRC1/KNSTRN/CHEK2/DUSP1/KIFC1/ZWINT/CCNB1/AURKB/CDT1/CDC20/SPC24/PSRC1/FLNA	26
BP	GO:0051146	striated muscle cell differentiation	36/941	313/18888	2.6824414336351e-06	0.000466929805413448	0.000398325513793147	NEB/CDK1/CXCL9/CXCL10/TPM1/PI16/HOPX/DMPK/JAM2/MYL9/PDGFRB/CSRP1/SORBS2/TMOD1/MYOM1/PGM5/CFL2/MEIS1/AKAP6/LMOD1/ASB2/LDB3/CACNA1H/BVES/CDON/MYH11/ACTC1/PLPP7/POPDC2/RBM24/MYOCD/SLC8A1/ISL1/FLNC/ADAMTS15/RGS4	36
BP	GO:0044771	meiotic cell cycle phase transition	7/941	15/18888	3.37117770611345e-06	0.000550266704689436	0.00046941802670875	NDC80/MAPK15/TTK/PKMYT1/ZWINT/CDC25C/CDC20	7
BP	GO:0048285	organelle fission	49/941	493/18888	3.37921312309281e-06	0.000550266704689436	0.00046941802670875	TPX2/TRIP13/RAD51AP1/EME1/NDC80/NUF2/KAT2B/MTFR2/SGO1/NEK2/RAD54B/MAPK15/SKA3/CDK1/MAD2L1/TOM1L2/TTK/UBE2C/MYBL2/AURKA/SKA1/PKMYT1/PRC1/HSPA2/CCNE1/KNSTRN/BTC/PRKN/CHEK2/DUSP1/KIFC1/ZWINT/CCNB1/RCC1/CDC25C/AURKB/CKS2/PDGFRB/CDT1/P3H4/CDC20/SPC24/UBE2S/PSRC1/FLNA/DCN/LRRK2/MAPT/PDE3A	49
BP	GO:0055001	muscle cell development	27/941	204/18888	3.51387424723758e-06	0.000554313662501729	0.000472870379784505	NEB/CDK1/COMP/TPM1/PI16/MYL9/PDGFRB/CSRP1/SORBS2/TMOD1/MYOM1/PGM5/CFL2/DMD/MEIS1/AKAP6/LMOD1/ASB2/LDB3/ANK2/BVES/MYH11/ACTC1/SLC8A1/ISL1/FLNC/RGS4	27
BP	GO:0051783	regulation of nuclear division	22/941	147/18888	3.73371324212307e-06	0.00057114498321931	0.000487228735997622	TRIP13/RAD51AP1/NDC80/NUF2/NEK2/MAD2L1/TOM1L2/TTK/UBE2C/AURKA/PKMYT1/BTC/DUSP1/ZWINT/CCNB1/RCC1/CDC25C/AURKB/PDGFRB/CDC20/SPC24/PDE3A	22
BP	GO:0086065	cell communication involved in cardiac conduction	13/941	58/18888	4.18998260797055e-06	0.00062208918250104	0.000530687890068345	KCNA5/ATP1B2/CACNB2/ATP1A2/CTNNA3/CASQ2/FLNA/ANK2/RYR2/GJC1/CAV1/SLC8A1/SCN4B	13
BP	GO:0010038	response to metal ion	39/941	360/18888	4.52329009931659e-06	0.000635664330565533	0.000542268491188505	CDK1/MTTP/TERT/PRKN/AQP3/BMP6/MT1M/CPNE7/CYBRD1/S100A8/TXNIP/TNNC1/DLG2/KCNB1/SUCNR1/ITPKB/RYR3/KCNMB1/CASQ2/CLDN1/KIT/MAOB/NPTX1/CACNA1H/LRRK2/MAPT/RYR2/OTC/TRPC1/SYT13/KCNMA1/TUBA1A/CAV1/NLGN1/FABP4/SOD3/RASGRP2/KCNK3/DPEP1	39
BP	GO:0043269	regulation of monoatomic ion transport	47/941	470/18888	4.5332638471393e-06	0.000635664330565533	0.000542268491188505	CEMIP/PER1/CXCL9/KCNA5/FXYD6/AHNAK/ADRB2/P2RY1/CXCL10/ATP1B2/FHL1/DMPK/PDGFRB/SLMAP/CACNB2/PLN/KCNJ14/KCNJ15/ATP1A2/KCNMB1/DMD/CASQ2/AKAP6/ATP2B4/FLNA/MAOB/ANK2/CXCL12/JPH2/RYR2/MYLK/IL16/TRPC1/CD84/CAV1/CNTN1/TACR2/SLC8A1/KCNE4/GRIN2A/SCN4B/RELN/FGF14/HTR1B/PDZK1/RGS4/CNR1	47
BP	GO:0048545	response to steroid hormone	37/941	338/18888	6.2250541731162e-06	0.000849299282861907	0.000724514839892415	ANXA1/PER1/IL1RN/KLF9/FAM107A/NR4A3/SCNN1B/BMP6/GHR/TXNIP/LMO3/KANK2/PCK1/PGR/ATP1A2/TP63/SFRP1/NR3C2/CLDN1/MAOB/AR/HEYL/TCF21/FBXO32/BCHE/ADTRP/CAV1/PADI2/SOX10/PDE3A/ISL1/SLIT2/CDO1/HTR1B/TACR1/PTGDS/IL6	37
BP	GO:0008608	attachment of spindle microtubules to kinetochore	12/941	52/18888	7.09421473450331e-06	0.000942410420520334	0.00080394549802917	NDC80/NUF2/KAT2B/SGO1/NEK2/SKA3/SKA1/KNSTRN/CCNB1/AURKB/CDT1/SPC24	12
BP	GO:0060537	muscle tissue development	44/941	438/18888	8.10594843631491e-06	0.00104920071042353	0.000895045480511856	NEB/CDK1/HLF/SOX15/TPM1/PI16/HOPX/TGFBR3/TNNC1/PDGFRB/CSRP1/SORBS2/PLN/ITGA8/MYOM1/PGM5/SVIL/CFL2/DMD/MEIS1/AKAP6/FGF2/ASB2/BVES/HEYL/CDON/MYH11/ACTC1/TCF21/JPH2/RYR2/ZFPM2/POPDC2/RBM24/MYLK/MYOCD/GJC1/CAV1/SLC8A1/RBP4/ISL1/RGS4/EYA2/GATA5	44
BP	GO:0000819	sister chromatid segregation	28/941	229/18888	1.08431085364923e-05	0.00132929542553175	0.00113398690171206	TPX2/TRIP13/NDC80/NUF2/KAT2B/NEK2/MAPK15/SKA3/CDK1/MAD2L1/TTK/UBE2C/MYBL2/SKA1/PRC1/KNSTRN/CHEK2/DUSP1/KIFC1/ZWINT/CCNB1/MAP3K20/AURKB/CDT1/CDC20/SPC24/PSRC1/FLNA	28
BP	GO:0071805	potassium ion transmembrane transport	27/941	217/18888	1.12417024373418e-05	0.00132929542553175	0.00113398690171206	KCNA5/ATP1B2/FHL1/SLC9A9/KCNB1/KCNJ14/KCNJ15/ATP1A2/KCNMB1/KCNN3/CASQ2/AKAP6/FLNA/KCNC3/SLC9A4/ANK2/KCNA3/KCNA2/KCNMA1/CAV1/KCNQ4/KCNE4/KCNK3/KCNK9/RGS4/ABCC9/KCNH3	27
BP	GO:0023061	signal release	47/941	487/18888	1.16253651003009e-05	0.00132929542553175	0.00113398690171206	SOX4/ANXA1/KCNA5/IL1RN/TIAM1/P2RY1/PRKN/GHRL/BMP6/F2RL2/KCNB1/LTBP4/CPLX1/SUCNR1/MYRIP/SFRP1/MAOB/NNAT/ITPR1/ADCY5/GRIK5/LRRK2/CXCL12/FAM3B/HCAR2/KCNA2/GNAZ/SYT13/CPE/SNCG/CHRNB4/TACR2/PRKCB/NLGN1/RBP4/AGTR1/RIMS3/ISL1/UNC13A/HTR1B/RIMS1/CNR1/TACR1/CHGA/IL6/CHRNA3/BLK	47
BP	GO:0007094	mitotic spindle assembly checkpoint signaling	11/941	46/18888	1.18498997917846e-05	0.00132929542553175	0.00113398690171206	TRIP13/NDC80/NUF2/MAD2L1/TTK/DUSP1/ZWINT/CCNB1/AURKB/CDC20/SPC24	11
BP	GO:0071173	spindle assembly checkpoint signaling	11/941	46/18888	1.18498997917846e-05	0.00132929542553175	0.00113398690171206	TRIP13/NDC80/NUF2/MAD2L1/TTK/DUSP1/ZWINT/CCNB1/AURKB/CDC20/SPC24	11
BP	GO:0071174	mitotic spindle checkpoint signaling	11/941	46/18888	1.18498997917846e-05	0.00132929542553175	0.00113398690171206	TRIP13/NDC80/NUF2/MAD2L1/TTK/DUSP1/ZWINT/CCNB1/AURKB/CDC20/SPC24	11
BP	GO:0000280	nuclear division	44/941	446/18888	1.27762500356075e-05	0.00140205456912493	0.00119605580996957	TPX2/TRIP13/RAD51AP1/EME1/NDC80/NUF2/KAT2B/SGO1/NEK2/RAD54B/MAPK15/SKA3/CDK1/MAD2L1/TOM1L2/TTK/UBE2C/MYBL2/AURKA/SKA1/PKMYT1/PRC1/HSPA2/CCNE1/KNSTRN/BTC/CHEK2/DUSP1/KIFC1/ZWINT/CCNB1/RCC1/CDC25C/AURKB/CKS2/PDGFRB/CDT1/P3H4/CDC20/SPC24/UBE2S/PSRC1/FLNA/PDE3A	44
BP	GO:0086003	cardiac muscle cell contraction	15/941	83/18888	1.30936900027376e-05	0.00140631802412382	0.0011996928510907	GSN/KCNA5/CACNB2/PLN/SCN7A/ATP1A2/CTNNA3/FLNA/ANK2/RYR2/GJC1/CAV1/KCNE4/SCN4B/ABCC9	15
BP	GO:0002027	regulation of heart rate	17/941	104/18888	1.42738443646235e-05	0.00150113263234624	0.00128057669508058	KCNA5/TPM1/CACNB2/PLN/CTNNA3/DMD/CASQ2/ANK2/BVES/RYR2/POPDC2/CAV1/SLC8A1/ISL1/KCNE4/SCN4B/RGS4	17
BP	GO:0031577	spindle checkpoint signaling	11/941	47/18888	1.47798862595839e-05	0.00152262991506897	0.00129891546053615	TRIP13/NDC80/NUF2/MAD2L1/TTK/DUSP1/ZWINT/CCNB1/AURKB/CDC20/SPC24	11
BP	GO:0086001	cardiac muscle cell action potential	15/941	84/18888	1.52158073646363e-05	0.00153618791153368	0.00131048143007846	KCNA5/SLMAP/CACNB2/SCN7A/ATP1A2/CTNNA3/DMD/FLNA/ANK2/RYR2/GJC1/CAV1/SLC8A1/KCNE4/SCN4B	15
BP	GO:0045839	negative regulation of mitotic nuclear division	12/941	56/18888	1.59711734473505e-05	0.00158083301102403	0.0013485669880931	TRIP13/NDC80/NUF2/MAD2L1/TOM1L2/TTK/DUSP1/ZWINT/CCNB1/AURKB/CDC20/SPC24	12
BP	GO:0030048	actin filament-based movement	20/941	138/18888	1.65877104682936e-05	0.00161028389315281	0.00137369075963136	GSN/KCNA5/TPM1/TNNC1/CACNB2/PLN/SCN7A/ATP1A2/CTNNA3/FLNA/ACTA2/ANK2/FRMD6/ACTC1/RYR2/GJC1/CAV1/KCNE4/SCN4B/ABCC9	20
BP	GO:0033046	negative regulation of sister chromatid segregation	11/941	48/18888	1.83180475988762e-05	0.00165124114784155	0.00140863031441734	TRIP13/NDC80/NUF2/MAD2L1/TTK/DUSP1/ZWINT/CCNB1/AURKB/CDC20/SPC24	11
BP	GO:0033048	negative regulation of mitotic sister chromatid segregation	11/941	48/18888	1.83180475988762e-05	0.00165124114784155	0.00140863031441734	TRIP13/NDC80/NUF2/MAD2L1/TTK/DUSP1/ZWINT/CCNB1/AURKB/CDC20/SPC24	11
BP	GO:0045841	negative regulation of mitotic metaphase/anaphase transition	11/941	48/18888	1.83180475988762e-05	0.00165124114784155	0.00140863031441734	TRIP13/NDC80/NUF2/MAD2L1/TTK/DUSP1/ZWINT/CCNB1/AURKB/CDC20/SPC24	11
BP	GO:2000816	negative regulation of mitotic sister chromatid separation	11/941	48/18888	1.83180475988762e-05	0.00165124114784155	0.00140863031441734	TRIP13/NDC80/NUF2/MAD2L1/TTK/DUSP1/ZWINT/CCNB1/AURKB/CDC20/SPC24	11
BP	GO:0035296	regulation of tube diameter	21/941	152/18888	2.16455503404264e-05	0.00185466668873149	0.00158216728325977	KAT2B/KCNA5/COMP/SCNN1B/HRH2/ADRB2/P2RY1/NPR1/ATP1A2/KCNMB1/CYSLTR1/ACTA2/ADRA1D/KCNMA1/CAV1/SLC8A1/SOD3/AGTR1/ITGA9/HTR1B/TACR1	21
BP	GO:0097746	blood vessel diameter maintenance	21/941	152/18888	2.16455503404264e-05	0.00185466668873149	0.00158216728325977	KAT2B/KCNA5/COMP/SCNN1B/HRH2/ADRB2/P2RY1/NPR1/ATP1A2/KCNMB1/CYSLTR1/ACTA2/ADRA1D/KCNMA1/CAV1/SLC8A1/SOD3/AGTR1/ITGA9/HTR1B/TACR1	21
BP	GO:0032970	regulation of actin filament-based process	39/941	385/18888	2.16769680339061e-05	0.00185466668873149	0.00158216728325977	NEB/GPM6B/GSN/FAM107A/TPM1/PRKN/CGNL1/STMN1/TNNC1/PDGFRB/TMOD1/KANK2/PLN/DAAM2/APOA1/SVIL/CFL2/ATP1A2/CTNNA3/DIXDC1/SFRP1/FERMT2/LMOD1/FLNA/LPAR1/ACTA2/ANK2/FRMD6/JAM3/CXCL12/RYR2/CAV1/CORO2B/SMIM22/SLIT2/RAC3/SYNPO2/RGS4/TACR1	39
BP	GO:1902850	microtubule cytoskeleton organization involved in mitosis	22/941	164/18888	2.22336159553841e-05	0.00187058822237965	0.00159574952409608	TPX2/NDC80/NUF2/NEK2/CDK1/MAD2L1/TTK/MYBL2/AURKA/PRC1/CENPA/CHEK2/KIFC1/CCNB1/RCC1/AURKB/STMN1/CDC20/PSRC1/EML1/FLNA/FGF10	22
BP	GO:0030239	myofibril assembly	14/941	77/18888	2.35360726798761e-05	0.00194424008429459	0.00165857998683151	NEB/TPM1/MYL9/PDGFRB/CSRP1/TMOD1/MYOM1/PGM5/CFL2/LMOD1/LDB3/MYH11/ACTC1/FLNC	14
BP	GO:0035150	regulation of tube size	21/941	153/18888	2.39344402010705e-05	0.00194424008429459	0.00165857998683151	KAT2B/KCNA5/COMP/SCNN1B/HRH2/ADRB2/P2RY1/NPR1/ATP1A2/KCNMB1/CYSLTR1/ACTA2/ADRA1D/KCNMA1/CAV1/SLC8A1/SOD3/AGTR1/ITGA9/HTR1B/TACR1	21
BP	GO:0014706	striated muscle tissue development	30/941	265/18888	2.4264485996545e-05	0.00194424008429459	0.00165857998683151	NEB/CDK1/SOX15/TPM1/PI16/HOPX/TGFBR3/TNNC1/PDGFRB/SORBS2/PLN/PGM5/MEIS1/AKAP6/FGF2/ASB2/BVES/MYH11/ACTC1/JPH2/RYR2/ZFPM2/MYOCD/GJC1/SLC8A1/RBP4/ISL1/RGS4/EYA2/GATA5	30
BP	GO:0042063	gliogenesis	36/941	346/18888	2.51846770130772e-05	0.00198371249055484	0.00169225285654764	GPM6B/SOX4/CDK1/DAB1/MAL/PTN/LGI4/ASPA/TIAM1/P2RY1/VCAN/S100A9/ATP1B2/S100A8/ASCL2/ID4/NTN1/PRDM8/DAAM2/NDN/CYSLTR1/LPAR1/FGF2/TSPAN2/CSPG4/BMERB1/TRPC4/MAPT/ROR2/TUBA1A/CNTN1/SOX10/RELN/FGF10/VTN/IL6	36
BP	GO:0007626	locomotory behavior	25/941	202/18888	2.57281553488311e-05	0.00198371249055484	0.00169225285654764	GNG7/DAB1/LGI4/IDO1/PRKN/C1QL1/NEGR1/TMOD1/RASD2/ATP1A2/MEIS1/SOBP/ADCY5/LRRK2/CHL1/CXCL12/TUBA1A/SNCG/CNTN1/CHRNB4/PPP1R1B/HPGDS/GLRB/RELN/CHRNA3	25
BP	GO:0031032	actomyosin structure organization	26/941	215/18888	2.68352636916857e-05	0.00198371249055484	0.00169225285654764	NEB/TPM1/EPB41L3/CGNL1/MYL9/STMN1/PDGFRB/CSRP1/TMOD1/APOA1/MYOM1/PGM5/CFL2/SFRP1/FERMT2/LMOD1/SORBS1/LPAR1/LDB3/EPB41L4A/MYH11/ACTC1/CNN1/CORO2B/FLNC/TACR1	26
BP	GO:0051985	negative regulation of chromosome segregation	11/941	50/18888	2.76412073488108e-05	0.00198371249055484	0.00169225285654764	TRIP13/NDC80/NUF2/MAD2L1/TTK/DUSP1/ZWINT/CCNB1/AURKB/CDC20/SPC24	11
BP	GO:1902100	negative regulation of metaphase/anaphase transition of cell cycle	11/941	50/18888	2.76412073488108e-05	0.00198371249055484	0.00169225285654764	TRIP13/NDC80/NUF2/MAD2L1/TTK/DUSP1/ZWINT/CCNB1/AURKB/CDC20/SPC24	11
BP	GO:1905819	negative regulation of chromosome separation	11/941	50/18888	2.76412073488108e-05	0.00198371249055484	0.00169225285654764	TRIP13/NDC80/NUF2/MAD2L1/TTK/DUSP1/ZWINT/CCNB1/AURKB/CDC20/SPC24	11
BP	GO:0010965	regulation of mitotic sister chromatid separation	12/941	59/18888	2.79008690232555e-05	0.00198371249055484	0.00169225285654764	TRIP13/NDC80/NUF2/MAD2L1/TTK/UBE2C/DUSP1/ZWINT/CCNB1/AURKB/CDC20/SPC24	12
BP	GO:0051480	regulation of cytosolic calcium ion concentration	12/941	59/18888	2.79008690232555e-05	0.00198371249055484	0.00169225285654764	P2RY1/CACNB2/PLN/ATP2B4/ITPR1/TRPC4/RYR2/TRPC1/CAV1/SLC8A2/HTR1B/CNR1	12
BP	GO:0060326	cell chemotaxis	34/941	322/18888	3.10333921795627e-05	0.00217578560725601	0.00185610537144139	ANXA1/CXCL9/PTN/TIAM1/CXCL10/CCR8/DUSP1/CXCL6/S100A9/S100A8/PDGFRB/IL23A/SMOC2/KIT/LPAR1/FGF2/JAM3/CXCL12/CCL20/IL16/ADGRE2/EGR3/PADI2/AGTR1/SLIT2/ITGA9/RAC3/MMP28/CCL25/CHGA/IL6/SCG2/THBS4/DPEP1	34
BP	GO:0055002	striated muscle cell development	14/941	79/18888	3.1780017516124e-05	0.00219760997837526	0.00187472316738952	NEB/TPM1/MYL9/PDGFRB/CSRP1/TMOD1/MYOM1/PGM5/CFL2/LMOD1/LDB3/MYH11/ACTC1/FLNC	14
BP	GO:0051310	metaphase chromosome alignment	16/941	100/18888	3.32774339069971e-05	0.00221264494431645	0.00188754910067533	NDC80/NUF2/KAT2B/SGO1/NEK2/SKA3/SKA1/KNSTRN/KIFC1/ZWINT/CCNB1/AURKB/CDT1/SPC24/PSRC1/GEM	16
BP	GO:0006940	regulation of smooth muscle contraction	12/941	60/18888	3.33124040744949e-05	0.00221264494431645	0.00188754910067533	ADRB2/GHRL/ATP1A2/KIT/CHRM2/MYOCD/CNN1/CAV1/CHRNB4/TACR2/TACR1/CHRNA3	12
BP	GO:0043113	receptor clustering	12/941	60/18888	3.33124040744949e-05	0.00221264494431645	0.00188754910067533	GSN/PTN/DLG2/FLNA/MAGI2/ITGB7/FRRS1L/CHRDL1/NLGN1/MADCAM1/GLRB/RELN	12
BP	GO:0051966	regulation of synaptic transmission, glutamatergic	14/941	80/18888	3.67793603947754e-05	0.00241119754899774	0.0020569290960359	ATP1A2/PLPPR4/LRRK2/ROR2/FRRS1L/NLGN1/TSHZ3/UNC13A/GRIN2A/DGKI/RELN/HTR1B/CACNG4/CNR1	14
BP	GO:0006935	chemotaxis	44/941	466/18888	3.72640452943642e-05	0.00241165257238398	0.00205731726449722	ANXA1/CXCL9/PTN/TIAM1/CXCL10/CCR8/DUSP1/CXCL6/S100A9/S100A8/PDGFRB/NTN1/IL23A/APOA1/SMOC2/EPHA7/SUCNR1/CYSLTR1/KIT/NRP2/LPAR1/FGF2/JAM3/CXCL12/CCL20/IL16/ADGRE2/EGR3/FPR3/PADI2/AGTR1/SLIT2/NTRK3/ITGA9/RAC3/MMP28/FGF10/CCL25/LGR6/CHGA/IL6/SCG2/THBS4/DPEP1	44
BP	GO:0050900	leukocyte migration	39/941	396/18888	4.07171582536628e-05	0.0026017748717024	0.00221950558848414	LYVE1/ANXA1/CXCL9/PTN/CXCL10/DUSP1/CXCL6/S100A9/S100A8/JAM2/ASCL2/IL23A/KIT/ASB2/JAM3/CXCL12/ITGB7/CCL20/CD177/ROR2/GPR15/IL16/ADTRP/ITGA7/ADGRE2/PADI2/PODXL2/SLIT2/ITGA9/MADCAM1/RAC3/MMP28/CCL25/TACR1/CHGA/IL6/SCG2/THBS4/DPEP1	39
BP	GO:0042330	taxis	44/941	468/18888	4.12664047073469e-05	0.00260391013703359	0.00222132712707574	ANXA1/CXCL9/PTN/TIAM1/CXCL10/CCR8/DUSP1/CXCL6/S100A9/S100A8/PDGFRB/NTN1/IL23A/APOA1/SMOC2/EPHA7/SUCNR1/CYSLTR1/KIT/NRP2/LPAR1/FGF2/JAM3/CXCL12/CCL20/IL16/ADGRE2/EGR3/FPR3/PADI2/AGTR1/SLIT2/NTRK3/ITGA9/RAC3/MMP28/FGF10/CCL25/LGR6/CHGA/IL6/SCG2/THBS4/DPEP1	44
BP	GO:0051306	mitotic sister chromatid separation	12/941	62/18888	4.69178825330304e-05	0.00292396877810787	0.00249436072050198	TRIP13/NDC80/NUF2/MAD2L1/TTK/UBE2C/DUSP1/ZWINT/CCNB1/AURKB/CDC20/SPC24	12
BP	GO:0072001	renal system development	34/941	329/18888	4.80599452960499e-05	0.00295861712017634	0.00252391830816611	HOXC11/SOX4/GCNT4/ADAMTS1/ZBTB16/BMP6/LGR5/FOXF1/BMPER/PDGFRB/MME/KANK2/CC2D2A/ITGA8/EPHA7/PBX1/TNS2/SFRP1/GFRA1/MAGI2/FGF2/ACTA2/HEYL/LRRK2/TCF21/MYOCD/RBP4/TMEM59L/AGTR1/SLIT2/SIX2/FGF10/DCHS2/RGN	34
BP	GO:0050433	regulation of catecholamine secretion	11/941	53/18888	4.91938721268614e-05	0.00299193574092044	0.00255234154560545	P2RY1/PRKN/KCNB1/CXCL12/KCNA2/SYT13/SNCG/PRKCB/HTR1B/CNR1/CHGA	11
BP	GO:0007188	adenylate cyclase-modulating G protein-coupled receptor signaling pathway	28/941	249/18888	5.04901702037457e-05	0.00300998846408889	0.00256774184806648	CXCL9/ADRB2/P2RY1/CXCL10/LGR5/PDE2A/PTH1R/PLN/ATP2B4/FLNA/LPAR1/GNAO1/ADCY5/GLP2R/CHRM2/ADRA1D/GNAZ/ADGRE2/ADGRL3/VIPR2/PTGER3/AKAP12/PTGFR/HTR1B/ADGRG2/ADCY2/CNR1/CHGA	28
BP	GO:0014808	release of sequestered calcium ion into cytosol by sarcoplasmic reticulum	9/941	36/18888	5.0683244740007e-05	0.00300998846408889	0.00256774184806648	PLN/ATP1A2/RYR3/DMD/CASQ2/AKAP6/ANK2/RYR2/SLC8A1	9
BP	GO:0010976	positive regulation of neuron projection development	21/941	161/18888	5.16092120520138e-05	0.00302934072602983	0.00258425075281259	KAT2B/PTN/TIAM1/S100A9/ATP1B2/NEGR1/GPC2/FLNA/MAGI2/APBB1/VLDLR/ROR2/STMN2/CNTN1/RGMA/NLGN1/TOX/ZDHHC15/NTRK3/RELN/CNR1	21
BP	GO:0098813	nuclear chromosome segregation	33/941	317/18888	5.35067316534925e-05	0.00307041130624611	0.00261928698262008	TPX2/TRIP13/NDC80/NUF2/KAT2B/SGO1/NEK2/MAPK15/SKA3/CDK1/MAD2L1/TTK/UBE2C/MYBL2/AURKA/SKA1/PRC1/CCNE1/KNSTRN/CHEK2/DUSP1/KIFC1/ZWINT/CCNB1/MAP3K20/AURKB/CDT1/P3H4/CDC20/SPC24/PSRC1/FLNA/GEM	33
BP	GO:0043270	positive regulation of monoatomic ion transport	25/941	211/18888	5.35253951960495e-05	0.00307041130624611	0.00261928698262008	CEMIP/CXCL9/ADRB2/P2RY1/CXCL10/ATP1B2/FHL1/PDGFRB/CACNB2/KCNMB1/DMD/AKAP6/FLNA/ANK2/CXCL12/JPH2/RYR2/MYLK/TRPC1/CAV1/CNTN1/TACR2/SCN4B/RELN/PDZK1	25
BP	GO:0033045	regulation of sister chromatid segregation	16/941	104/18888	5.44670979918842e-05	0.00308932483891047	0.00263542161898046	TRIP13/NDC80/NUF2/KAT2B/MAPK15/CDK1/MAD2L1/TTK/UBE2C/DUSP1/ZWINT/CCNB1/MAP3K20/AURKB/CDC20/SPC24	16
BP	GO:0051784	negative regulation of nuclear division	12/941	63/18888	5.53614724673345e-05	0.00310516347794561	0.00264893314460661	TRIP13/NDC80/NUF2/MAD2L1/TOM1L2/TTK/DUSP1/ZWINT/CCNB1/AURKB/CDC20/SPC24	12
BP	GO:0097553	calcium ion transmembrane import into cytosol	23/941	187/18888	5.89109767452935e-05	0.00325749788966186	0.00277888561735897	CEMIP/CXCL9/CXCL10/PLN/ATP1A2/RYR3/DMD/CASQ2/AKAP6/ATP2B4/FLNA/FGF2/CACNA1H/ANK2/ITPR1/JPH2/RYR2/TRPC1/CAV1/SLC8A1/GRIN2A/SLC8A2/PLCH2	23
BP	GO:0051952	regulation of amine transport	15/941	94/18888	6.00133327532792e-05	0.00325749788966186	0.00277888561735897	P2RY1/PRKN/KCNB1/ATP1A2/CXCL12/KCNA2/SYT13/SNCG/TACR2/PRKCB/HTR1B/RGS4/CNR1/CHGA/CHRNA3	15
BP	GO:0055006	cardiac cell development	15/941	94/18888	6.00133327532792e-05	0.00325749788966186	0.00277888561735897	NEB/CDK1/PI16/TGFBR3/PDGFRB/SORBS2/MEIS1/AKAP6/ASB2/BVES/MYH11/ACTC1/SLC8A1/ISL1/RGS4	15
BP	GO:0015837	amine transport	16/941	105/18888	6.13370261787153e-05	0.00329392881010803	0.00280996387566769	P2RY1/PRKN/KCNB1/ATP1A2/CXCL12/KCNA2/SYT13/SNCG/TACR2/PRKCB/AQP9/HTR1B/RGS4/CNR1/CHGA/CHRNA3	16
BP	GO:1903514	release of sequestered calcium ion into cytosol by endoplasmic reticulum	9/941	37/18888	6.4036215977973e-05	0.00340268229744008	0.00290273861014834	PLN/ATP1A2/RYR3/DMD/CASQ2/AKAP6/ANK2/RYR2/SLC8A1	9
BP	GO:0010881	regulation of cardiac muscle contraction by regulation of the release of sequestered calcium ion	7/941	22/18888	6.5706974948615e-05	0.00345509176604801	0.00294744774687263	PLN/ATP1A2/DMD/CASQ2/ANK2/RYR2/SLC8A1	7
BP	GO:1905818	regulation of chromosome separation	13/941	74/18888	6.64264453539554e-05	0.00345691439326564	0.00294900258212731	TRIP13/NDC80/NUF2/MAPK15/MAD2L1/TTK/UBE2C/DUSP1/ZWINT/CCNB1/AURKB/CDC20/SPC24	13
BP	GO:0051209	release of sequestered calcium ion into cytosol	18/941	129/18888	7.19470364248088e-05	0.00370600652931056	0.00316149652002033	CEMIP/CXCL9/CXCL10/PLN/ATP1A2/RYR3/DMD/CASQ2/AKAP6/FLNA/FGF2/ANK2/ITPR1/JPH2/RYR2/TRPC1/SLC8A1/PLCH2	18
BP	GO:0006813	potassium ion transport	27/941	241/18888	7.28181122951715e-05	0.00371298819056591	0.00316745239127641	KCNA5/ATP1B2/FHL1/SLC9A9/KCNB1/KCNJ14/KCNJ15/ATP1A2/KCNMB1/KCNN3/CASQ2/AKAP6/FLNA/KCNC3/SLC9A4/ANK2/KCNA3/KCNA2/KCNMA1/CAV1/KCNQ4/KCNE4/KCNK3/KCNK9/RGS4/ABCC9/KCNH3	27
BP	GO:0051283	negative regulation of sequestering of calcium ion	18/941	130/18888	7.96952339498269e-05	0.00402301540978726	0.00343192844303939	CEMIP/CXCL9/CXCL10/PLN/ATP1A2/RYR3/DMD/CASQ2/AKAP6/FLNA/FGF2/ANK2/ITPR1/JPH2/RYR2/TRPC1/SLC8A1/PLCH2	18
BP	GO:0015850	organic hydroxy compound transport	32/941	311/18888	8.61935700749281e-05	0.00426573668370821	0.00363898756632127	GPM6B/MAPK15/MTTP/SLC51B/P2RY1/APOC1/APOB/ACACB/PRKN/CD36/GHRL/AQP3/BMP6/AKR1C1/KCNB1/APOA1/SLC16A7/MAOB/CXCL12/ABCA8/LIPC/KCNA2/SYT13/SNCG/CAV1/PRKCB/AQP9/RBP4/AGTR1/HTR1B/CNR1/CHGA	32
BP	GO:0046879	hormone secretion	32/941	311/18888	8.61935700749281e-05	0.00426573668370821	0.00363898756632127	SOX4/ANXA1/KCNA5/IL1RN/TIAM1/P2RY1/PRKN/GHRL/BMP6/F2RL2/KCNB1/LTBP4/CPLX1/MYRIP/SFRP1/NNAT/ITPR1/ADCY5/FAM3B/HCAR2/GNAZ/CPE/TACR2/PRKCB/RBP4/AGTR1/ISL1/CNR1/TACR1/CHGA/IL6/BLK	32
BP	GO:0007052	mitotic spindle organization	18/941	131/18888	8.81704772544569e-05	0.0043212094095194	0.00368630988705144	TPX2/NDC80/NUF2/NEK2/TTK/MYBL2/AURKA/PRC1/CHEK2/KIFC1/CCNB1/RCC1/AURKB/STMN1/CDC20/PSRC1/EML1/FLNA	18
BP	GO:0042886	amide transport	32/941	312/18888	9.15823789161671e-05	0.00444526777662319	0.00379214081119473	SOX4/KCNA5/IL1RN/MTTP/TIAM1/SLC5A6/PRKN/GHRL/AQP3/F2RL2/SLC15A1/S100A8/KCNB1/CPLX1/MYRIP/SFRP1/NNAT/ITPR1/ADCY5/FAM3B/GNAZ/CPE/TACR2/PRKCB/AQP9/RBP4/FOLR2/ISL1/CNR1/CHGA/IL6/BLK	32
BP	GO:0015844	monoamine transport	14/941	87/18888	9.544106548271e-05	0.00454515564676151	0.00387735252124892	GPM6B/MAPK15/P2RY1/PRKN/KCNB1/MAOB/CXCL12/KCNA2/SYT13/SNCG/PRKCB/HTR1B/CNR1/CHGA	14
BP	GO:0055013	cardiac muscle cell development	14/941	87/18888	9.544106548271e-05	0.00454515564676151	0.00387735252124892	NEB/CDK1/PI16/PDGFRB/SORBS2/MEIS1/AKAP6/ASB2/BVES/MYH11/ACTC1/SLC8A1/ISL1/RGS4	14
BP	GO:0051282	regulation of sequestering of calcium ion	18/941	132/18888	9.74303283469681e-05	0.00457178522190457	0.00390006951013671	CEMIP/CXCL9/CXCL10/PLN/ATP1A2/RYR3/DMD/CASQ2/AKAP6/FLNA/FGF2/ANK2/ITPR1/JPH2/RYR2/TRPC1/SLC8A1/PLCH2	18
BP	GO:0019722	calcium-mediated signaling	26/941	232/18888	9.78115697237904e-05	0.00457178522190457	0.00390006951013671	FCGR3A/TMEM100/CCR8/RCAN2/DMPK/PDGFRB/PLN/ATP1A2/RYR3/DMD/CASQ2/AKAP6/ATP2B4/NCALD/ANK2/ITPR1/LRRK2/MAPT/CCL20/RYR2/SLC8A1/AGTR1/GRIN2A/PTGFR/SLC8A2/RGN	26
BP	GO:0009306	protein secretion	36/941	370/18888	0.000101731069968308	0.00471136184587171	0.0040191386503172	SOX4/KCNA5/IL1RN/COMP/MTTP/TIAM1/PRKN/GHRL/BMP6/F2RL2/ARL4D/KCNB1/CPLX1/MYOM1/SUCNR1/MYRIP/SFRP1/APBB1/NNAT/ITPR1/ADCY5/FAM3B/HCAR2/ADTRP/GNAZ/CAVIN1/SNCG/TACR2/PRKCB/RBP4/ISL1/CNR1/CHGA/IL6/SCG2/BLK	36
BP	GO:0010880	regulation of release of sequestered calcium ion into cytosol by sarcoplasmic reticulum	8/941	31/18888	0.00010424135710397	0.00478373064237129	0.00408087456375447	PLN/ATP1A2/DMD/CASQ2/AKAP6/ANK2/RYR2/SLC8A1	8
BP	GO:0035592	establishment of protein localization to extracellular region	36/941	371/18888	0.000107418825137912	0.00488513720086647	0.00416738182682975	SOX4/KCNA5/IL1RN/COMP/MTTP/TIAM1/PRKN/GHRL/BMP6/F2RL2/ARL4D/KCNB1/CPLX1/MYOM1/SUCNR1/MYRIP/SFRP1/APBB1/NNAT/ITPR1/ADCY5/FAM3B/HCAR2/ADTRP/GNAZ/CAVIN1/SNCG/TACR2/PRKCB/RBP4/ISL1/CNR1/CHGA/IL6/SCG2/BLK	36
BP	GO:0051588	regulation of neurotransmitter transport	15/941	99/18888	0.000110271196917366	0.00497008037534701	0.00423984461079836	GPM6B/P2RY1/PRKN/CPLX1/ATP1A2/LRRK2/SNCG/CHRNB4/TACR2/PRKCB/NLGN1/RIMS3/HTR1B/RIMS1/CHRNA3	15
BP	GO:0006874	intracellular calcium ion homeostasis	31/941	302/18888	0.000115423840070248	0.00513316008984763	0.00437896361822643	CEMIP/CXCL9/P2RY1/CXCL10/DMPK/PTH1R/CACNB2/PLN/ATP1A2/RYR3/DMD/CASQ2/AKAP6/ATP2B4/FLNA/FGF2/ANK2/ITPR1/TRPC4/CXCL12/JPH2/RYR2/TRPC1/CAV1/PRKCB/SLC8A1/SLC8A2/HTR1B/CNR1/PLCH2/RGN	31
BP	GO:0055119	relaxation of cardiac muscle	6/941	17/18888	0.000115923187449015	0.00513316008984763	0.00437896361822643	GSN/PLN/ATP1A2/PDE5A/SLC8A1/CHGA	6
BP	GO:0048738	cardiac muscle tissue development	27/941	248/18888	0.000118358147834026	0.00518708265977041	0.00442496354181348	NEB/CDK1/TPM1/PI16/HOPX/TGFBR3/TNNC1/PDGFRB/SORBS2/PLN/MEIS1/AKAP6/FGF2/ASB2/BVES/MYH11/ACTC1/JPH2/RYR2/ZFPM2/MYOCD/GJC1/SLC8A1/RBP4/ISL1/RGS4/GATA5	27
BP	GO:0051592	response to calcium ion	19/941	146/18888	0.000119196035763345	0.00518708265977041	0.00442496354181348	MTTP/AQP3/CPNE7/TXNIP/KCNB1/SUCNR1/ITPKB/RYR3/KCNMB1/CASQ2/RYR2/TRPC1/SYT13/KCNMA1/TUBA1A/CAV1/NLGN1/RASGRP2/DPEP1	19
BP	GO:0045664	regulation of neuron differentiation	23/941	196/18888	0.000121527099847036	0.00520943402755837	0.00444403090473377	FEZF1/DAB1/S100B/TIAM1/BMP6/ID4/PBX1/DIXDC1/SFRP1/NAP1L2/MEIS1/GDF7/FGF2/HEYL/LRRK2/CDON/CXCL12/MAP1B/ZEB1/NLGN1/ISL1/RAC3/RELN	23
BP	GO:0051315	attachment of mitotic spindle microtubules to kinetochore	7/941	24/18888	0.000122175040070832	0.00520943402755837	0.00444403090473377	NDC80/NUF2/KAT2B/SKA3/SKA1/AURKB/CDT1	7
BP	GO:0042310	vasoconstriction	14/941	89/18888	0.000122805596133012	0.00520943402755837	0.00444403090473377	KCNA5/COMP/SCNN1B/HRH2/ATP1A2/CYSLTR1/ACTA2/ADRA1D/CAV1/SLC8A1/AGTR1/ITGA9/HTR1B/TACR1	14
BP	GO:0010927	cellular component assembly involved in morphogenesis	18/941	135/18888	0.000130548553186551	0.00547587162089964	0.0046713217952082	NEB/TPM1/EPB41L3/MYL9/PDGFRB/CSRP1/TMOD1/PLN/MYOM1/PGM5/CFL2/LMOD1/LDB3/ANK2/MYH11/ACTC1/CNTN1/FLNC	18
BP	GO:0007051	spindle organization	23/941	197/18888	0.000131256035287016	0.00547587162089964	0.0046713217952082	TPX2/NDC80/NUF2/NEK2/MAPK15/AUNIP/TTK/MYBL2/AURKA/PRC1/KNSTRN/CCDC69/CHEK2/KIFC1/CCNB1/RCC1/AURKB/STMN1/CDC20/PSRC1/EML1/FLNA/STARD9	23
BP	GO:0051303	establishment of chromosome localization	16/941	112/18888	0.00013463971569189	0.00557099413780869	0.00475246830798552	NDC80/NUF2/KAT2B/SGO1/NEK2/SKA3/SKA1/KNSTRN/KIFC1/ZWINT/CCNB1/AURKB/CDT1/SPC24/PSRC1/GEM	16
BP	GO:0050432	catecholamine secretion	11/941	59/18888	0.000137464087818726	0.00564161557161731	0.00481271359235266	P2RY1/PRKN/KCNB1/CXCL12/KCNA2/SYT13/SNCG/PRKCB/HTR1B/CNR1/CHGA	11
BP	GO:0051208	sequestering of calcium ion	18/941	136/18888	0.000143597455911776	0.00584580610840844	0.0049869031590414	CEMIP/CXCL9/CXCL10/PLN/ATP1A2/RYR3/DMD/CASQ2/AKAP6/FLNA/FGF2/ANK2/ITPR1/JPH2/RYR2/TRPC1/SLC8A1/PLCH2	18
BP	GO:0018958	phenol-containing compound metabolic process	16/941	113/18888	0.000149729231808627	0.0059986758902377	0.00511731234193061	SULT1A1/GCNT4/PRKN/NPR1/HDC/DUOX1/MAOB/SULT1B1/RNF180/TRPC1/HAND2/KL/GRIN2A/TYRP1/TPO/TPH1	16
BP	GO:0035249	synaptic transmission, glutamatergic	16/941	113/18888	0.000149729231808627	0.0059986758902377	0.00511731234193061	PRKN/ATP1A2/PLPPR4/GRIK5/LRRK2/ROR2/FRRS1L/NLGN1/TSHZ3/UNC13A/GRIN2A/DGKI/RELN/HTR1B/CACNG4/CNR1	16
BP	GO:0098742	cell-cell adhesion via plasma-membrane adhesion molecules	29/941	279/18888	0.000152492979386036	0.00606129574756464	0.00517073169223599	LRRC4/DAB1/IL1RN/FAT3/CADM3/DSC3/FAT2/APOA1/CDH11/DSG3/CLDN1/CDH19/PALLD/CLDN16/PCDHB8/NEXN/CD177/SPARCL1/ADGRL3/PTPRS/LRFN5/PCDHGB7/CD84/PCDH9/NLGN1/PCDH19/DCHS2/TENM2/GATA5	29
BP	GO:0071692	protein localization to extracellular region	36/941	379/18888	0.000164315425060217	0.00639622025666765	0.00545644696597451	SOX4/KCNA5/IL1RN/COMP/MTTP/TIAM1/PRKN/GHRL/BMP6/F2RL2/ARL4D/KCNB1/CPLX1/MYOM1/SUCNR1/MYRIP/SFRP1/APBB1/NNAT/ITPR1/ADCY5/FAM3B/HCAR2/ADTRP/GNAZ/CAVIN1/SNCG/TACR2/PRKCB/RBP4/ISL1/CNR1/CHGA/IL6/SCG2/BLK	36
BP	GO:0009914	hormone transport	32/941	322/18888	0.000164707951876909	0.00639622025666765	0.00545644696597451	SOX4/ANXA1/KCNA5/IL1RN/TIAM1/P2RY1/PRKN/GHRL/BMP6/F2RL2/KCNB1/LTBP4/CPLX1/MYRIP/SFRP1/NNAT/ITPR1/ADCY5/FAM3B/HCAR2/GNAZ/CPE/TACR2/PRKCB/RBP4/AGTR1/ISL1/CNR1/TACR1/CHGA/IL6/BLK	32
BP	GO:0030073	insulin secretion	23/941	200/18888	0.000164720410730348	0.00639622025666765	0.00545644696597451	SOX4/KCNA5/IL1RN/TIAM1/PRKN/GHRL/F2RL2/KCNB1/CPLX1/MYRIP/SFRP1/NNAT/ITPR1/ADCY5/FAM3B/GNAZ/PRKCB/RBP4/ISL1/CNR1/CHGA/IL6/BLK	23
BP	GO:0007059	chromosome segregation	39/941	423/18888	0.000166927565160686	0.0064324454116881	0.00548734969122029	TPX2/TRIP13/NDC80/NUF2/KAT2B/SGO1/HJURP/NEK2/MAPK15/SKA3/CDK1/MAD2L1/TTK/UBE2C/MYBL2/AURKA/SKA1/PRC1/CCNE1/KNSTRN/CCDC69/CHEK2/DUSP1/KIFC1/ZWINT/CCNB1/RCC1/MAP3K20/AURKB/CDT1/P3H4/OIP5/CDC20/SPC24/PSRC1/CENPW/FLNA/GEM/STARD9	39
BP	GO:0010959	regulation of metal ion transport	37/941	394/18888	0.000168726318971084	0.00643253710545558	0.00548742791275728	CEMIP/PER1/CXCL9/KCNA5/FXYD6/AHNAK/ADRB2/CXCL10/ATP1B2/FHL1/DMPK/PDGFRB/SLMAP/CACNB2/PLN/ATP1A2/KCNMB1/DMD/CASQ2/AKAP6/ATP2B4/FLNA/ANK2/CXCL12/JPH2/RYR2/MYLK/IL16/TRPC1/CD84/CAV1/CNTN1/SLC8A1/KCNE4/SCN4B/FGF14/RGS4	37
BP	GO:0071900	regulation of protein serine/threonine kinase activity	28/941	267/18888	0.000169478493467827	0.00643253710545558	0.00548742791275728	CEMIP/HMGA2/SASH1/PKMYT1/CCNE1/ADRB2/DUSP1/CDKN2A/CCNB1/CCNP/CDC25C/TRIB3/CDKN3/GHR/PDGFRB/PRKAR2B/PSRC1/FERMT2/ATP2B4/KIT/FGF2/MST1/LRRK2/MYOCD/PKIA/SLC8A1/NTRK3/SLC8A2	28
BP	GO:0051304	chromosome separation	13/941	81/18888	0.000172703072439816	0.0065060082811656	0.00555010423685221	TRIP13/NDC80/NUF2/MAPK15/MAD2L1/TTK/UBE2C/DUSP1/ZWINT/CCNB1/AURKB/CDC20/SPC24	13
BP	GO:0046883	regulation of hormone secretion	27/941	254/18888	0.000176101771351564	0.00655591087211894	0.00559267482230348	SOX4/ANXA1/KCNA5/TIAM1/P2RY1/PRKN/GHRL/BMP6/F2RL2/KCNB1/MYRIP/SFRP1/NNAT/ITPR1/ADCY5/HCAR2/GNAZ/TACR2/PRKCB/RBP4/AGTR1/ISL1/CNR1/TACR1/CHGA/IL6/BLK	27
BP	GO:2000241	regulation of reproductive process	24/941	214/18888	0.000176625174050748	0.00655591087211894	0.00559267482230348	TRIP13/RAD51AP1/MAPK15/TTK/AURKA/PKMYT1/P2RY1/DUSP1/ZWINT/CDC25C/CDC20/PDE5A/SFRP1/KIT/AR/CACNA1H/ZFPM2/TACR2/PDE3A/HPGDS/CNR1/TACR1/PTGDS/RGN	24
BP	GO:1901993	regulation of meiotic cell cycle phase transition	5/941	12/18888	0.000179300206259054	0.00660662365836282	0.00563593656400916	MAPK15/TTK/PKMYT1/ZWINT/CDC25C	5
BP	GO:0007160	cell-matrix adhesion	26/941	241/18888	0.000181862978555681	0.00665249504165997	0.00567506823242784	GPM6B/LYVE1/FAM107A/TIAM1/CD36/MSLN/CDKN2A/LYPD3/STON1/ITGA8/TNXB/CDH11/SFRP1/ACER2/FERMT2/SORBS1/JAM3/ITGB7/ITGA7/CORO2B/ITGA9/MADCAM1/ITGBL1/VTN/CCL25/COL17A1	26
BP	GO:0086002	cardiac muscle cell action potential involved in contraction	11/941	61/18888	0.000187516395007256	0.00680994792803329	0.00580938714104266	KCNA5/CACNB2/SCN7A/CTNNA3/FLNA/ANK2/RYR2/GJC1/CAV1/KCNE4/SCN4B	11
BP	GO:0046928	regulation of neurotransmitter secretion	13/941	82/18888	0.000196031791920281	0.00706834632581126	0.00602982000560803	P2RY1/PRKN/CPLX1/LRRK2/SNCG/CHRNB4/TACR2/PRKCB/NLGN1/RIMS3/HTR1B/RIMS1/CHRNA3	13
BP	GO:1902099	regulation of metaphase/anaphase transition of cell cycle	14/941	93/18888	0.00019843726885684	0.0071043356963782	0.00606052158934924	TRIP13/NDC80/NUF2/MAPK15/MAD2L1/TTK/UBE2C/DUSP1/ZWINT/CCNB1/MAP3K20/AURKB/CDC20/SPC24	14
BP	GO:0055074	calcium ion homeostasis	32/941	326/18888	0.000206304150582298	0.00730689654048557	0.00623332090815049	CEMIP/CXCL9/P2RY1/CXCL10/DMPK/PTH1R/CACNB2/PLN/ATP1A2/RYR3/DMD/CASQ2/AKAP6/ATP2B4/FLNA/FGF2/ANK2/ITPR1/TRPC4/CXCL12/JPH2/RYR2/TRPC1/CAV1/PRKCB/SLC8A1/KL/SLC8A2/HTR1B/CNR1/PLCH2/RGN	32
BP	GO:0140694	non-membrane-bounded organelle assembly	38/941	413/18888	0.000209864576547956	0.00730689654048557	0.00623332090815049	TPX2/NDC80/NEB/KAT2B/GSN/NEK2/MAPK15/MYBL2/AURKA/PRC1/CENPA/TPM1/CCDC69/CHEK2/BRIX1/KIFC1/RCC1/AURKB/MYL9/PDGFRB/CSRP1/TMOD1/CDC20/MYOM1/PGM5/CFL2/CENPW/LMOD1/FLNA/GRB7/ASB2/LDB3/MYH11/ACTC1/MAPT/STARD9/SMIM22/FLNC	38
BP	GO:0086019	cell-cell signaling involved in cardiac conduction	8/941	34/18888	0.000210070303041513	0.00730689654048557	0.00623332090815049	KCNA5/CACNB2/CASQ2/FLNA/ANK2/RYR2/GJC1/SCN4B	8
BP	GO:0090075	relaxation of muscle	8/941	34/18888	0.000210070303041513	0.00730689654048557	0.00623332090815049	GSN/P2RY1/PLN/ATP1A2/PDE5A/SLC8A1/TNNI2/CHGA	8
BP	GO:0002026	regulation of the force of heart contraction	7/941	26/18888	0.000212780069621905	0.00730689654048557	0.00623332090815049	PLN/ATP1A2/ATP2B4/RYR2/CAV1/SLC8A1/CHGA	7
BP	GO:0010882	regulation of cardiac muscle contraction by calcium ion signaling	7/941	26/18888	0.000212780069621905	0.00730689654048557	0.00623332090815049	PLN/ATP1A2/DMD/CASQ2/ANK2/RYR2/SLC8A1	7
BP	GO:0070296	sarcoplasmic reticulum calcium ion transport	9/941	43/18888	0.000221891750668779	0.00752156057934904	0.00641644514348922	PLN/ATP1A2/RYR3/DMD/CASQ2/AKAP6/ANK2/RYR2/SLC8A1	9
BP	GO:0051279	regulation of release of sequestered calcium ion into cytosol	13/941	83/18888	0.000222011197766047	0.00752156057934904	0.00641644514348922	CEMIP/CXCL9/CXCL10/PLN/ATP1A2/DMD/CASQ2/AKAP6/ANK2/JPH2/RYR2/TRPC1/SLC8A1	13
BP	GO:0034762	regulation of transmembrane transport	43/941	489/18888	0.000225407565725186	0.00758571594520491	0.00647117439566129	CEMIP/CXCL9/FXYD6/AHNAK/NR4A3/TERT/ADRB2/CXCL10/TRIB3/ATP1B2/FHL1/SLMAP/CACNB2/CLIP3/PLN/KCNJ14/KCNJ15/ATP1A2/KCNMB1/DMD/CASQ2/AKAP6/ATP2B4/FLNA/SORBS1/PRRT1/ANK2/PID1/JPH2/RYR2/TRPC1/CAV1/PRKCB/SLC8A1/NLGN1/KCNE4/GRIN2A/SCN4B/RELN/FGF14/PDZK1/RGS4/CACNG4	43
BP	GO:0086014	atrial cardiac muscle cell action potential	6/941	19/18888	0.000233242137646579	0.00769546608392112	0.00656479934717685	KCNA5/CACNB2/FLNA/ANK2/RYR2/GJC1	6
BP	GO:0086026	atrial cardiac muscle cell to AV node cell signaling	6/941	19/18888	0.000233242137646579	0.00769546608392112	0.00656479934717685	KCNA5/CACNB2/FLNA/ANK2/RYR2/GJC1	6
BP	GO:0086066	atrial cardiac muscle cell to AV node cell communication	6/941	19/18888	0.000233242137646579	0.00769546608392112	0.00656479934717685	KCNA5/CACNB2/FLNA/ANK2/RYR2/GJC1	6
BP	GO:0010975	regulation of neuron projection development	41/941	460/18888	0.000236136074843973	0.0077403565312492	0.00660309420496716	KAT2B/DAB1/PTN/TIAM1/FAT3/S100A9/ATP1B2/DGKG/NEGR1/NTN1/GPC2/MAP6/EPHA7/SRCIN1/SFRP1/FLNA/NCS1/LPAR1/MAGI2/APBB1/LRRK2/SPART/VLDLR/CXCL12/MAPT/ROR2/MAP1B/STMN2/PTPRS/CNTN1/RGMA/NLGN1/TOX/ZDHHC15/NR2F1/SLIT2/NTRK3/NEU4/RELN/CNR1/CHRNA3	41
BP	GO:0009308	amine metabolic process	16/941	118/18888	0.000249378520501687	0.00810798249293606	0.00691670622624936	SULT1A1/IDO1/PRKN/NPR1/HDC/GDPD3/DMGDH/ATP2B4/AOC3/MAOB/SULT1B1/RNF180/HAND2/KL/INMT/GRIN2A	16
BP	GO:0050796	regulation of insulin secretion	20/941	167/18888	0.000250563642808642	0.00810798249293606	0.00691670622624936	SOX4/KCNA5/TIAM1/PRKN/GHRL/F2RL2/KCNB1/MYRIP/SFRP1/NNAT/ITPR1/ADCY5/GNAZ/PRKCB/RBP4/ISL1/CNR1/CHGA/IL6/BLK	20
BP	GO:0010001	glial cell differentiation	27/941	260/18888	0.000257698691373493	0.00828575155448022	0.00706835632858841	GPM6B/SOX4/CDK1/DAB1/MAL/PTN/LGI4/ASPA/VCAN/S100A9/S100A8/ID4/PRDM8/DAAM2/LPAR1/FGF2/TSPAN2/TRPC4/MAPT/ROR2/TUBA1A/CNTN1/SOX10/RELN/FGF10/VTN/IL6	27
BP	GO:0050808	synapse organization	43/941	493/18888	0.000268559319217252	0.00853654200916293	0.00728229905736207	LRRC4/THBS2/RHOB/TIAM1/GHRL/C1QL1/DMPK/KY/PTPN13/NEGR1/NTN1/CAP2/CACNB2/CDC20/EPHA7/SRCIN1/PDZRN3/FLNA/NRP2/PRRT1/NPTX1/LRRK2/FILIP1/MAPT/ROR2/MAP1B/FRRS1L/CHRDL1/SPARCL1/ADGRL3/PTPRS/LRFN5/CNKSR2/TUBA1A/SNCG/NLGN1/ZDHHC15/UNC13A/RAC3/SLC8A2/GLRB/RELN/SLITRK5	43
BP	GO:0002790	peptide secretion	26/941	247/18888	0.000268880780399546	0.00853654200916293	0.00728229905736207	SOX4/KCNA5/IL1RN/TIAM1/PRKN/GHRL/F2RL2/S100A8/KCNB1/CPLX1/MYRIP/SFRP1/NNAT/ITPR1/ADCY5/FAM3B/GNAZ/CPE/TACR2/PRKCB/RBP4/ISL1/CNR1/CHGA/IL6/BLK	26
BP	GO:0051937	catecholamine transport	12/941	74/18888	0.000275314499603482	0.00868617246248985	0.0074099448544595	MAPK15/P2RY1/PRKN/KCNB1/CXCL12/KCNA2/SYT13/SNCG/PRKCB/HTR1B/CNR1/CHGA	12
BP	GO:0032412	regulation of monoatomic ion transmembrane transporter activity	24/941	221/18888	0.000287295305647223	0.00900786771992037	0.00768437460217579	FXYD6/AHNAK/ADRB2/ATP1B2/FHL1/SLMAP/CACNB2/PLN/ATP1A2/DMD/CASQ2/AKAP6/PRRT1/ANK2/JPH2/RYR2/CAV1/NLGN1/KCNE4/SCN4B/RELN/FGF14/PDZK1/CACNG4	24
BP	GO:0086009	membrane repolarization	10/941	54/18888	0.000291106249715343	0.0090710144973028	0.00773824345409662	KCNA5/ATP1B2/ATP1A2/CASQ2/AKAP6/FLNA/ANK2/CAV1/KCNE4/SCN4B	10
BP	GO:0051347	positive regulation of transferase activity	35/941	376/18888	0.000295663957322426	0.00915651323045156	0.00781118017052659	TPX2/CEMIP/HMGA2/RFC3/NEK2/MAPK15/SASH1/RFC4/UBE2C/CHTF18/ADRB2/FGFR4/TRIB3/GHR/AURKB/PDGFRB/CDC20/IL23A/APOA1/SRCIN1/UBE2S/PSRC1/FERMT2/ATP2B4/KIT/FGF2/LRRK2/MAPT/TLR3/ROR2/AGTR1/NTRK3/SLC8A2/RELN/CHRNA3	35
BP	GO:0050000	chromosome localization	16/941	120/18888	0.000302994096631092	0.00932630609630337	0.0079560259904865	NDC80/NUF2/KAT2B/SGO1/NEK2/SKA3/SKA1/KNSTRN/KIFC1/ZWINT/CCNB1/AURKB/CDT1/SPC24/PSRC1/GEM	16
BP	GO:0016055	Wnt signaling pathway	41/941	466/18888	0.000309130887618086	0.00945753164058241	0.00806797104462896	SOX4/DEPDC1B/SFRP4/CCNE1/TERT/TIAM1/PRKN/LGR5/SCEL/NKD2/LBX2/TGFB1I1/DAAM2/PRICKLE2/DIXDC1/SFRP1/RSPO2/FERMT2/RECK/FRZB/BARX1/MAGI2/NOTUM/FGF2/MCC/DACT3/PPM1N/LRRK2/KREMEN2/AMOTL1/ROR2/TRABD2A/WNT9A/CPE/CAV1/SOX10/ISL1/RAC3/FGF10/LGR6/SHISA3	41
BP	GO:0044784	metaphase/anaphase transition of cell cycle	14/941	97/18888	0.00031118794051759	0.00946311279357104	0.0080727321791849	TRIP13/NDC80/NUF2/MAPK15/MAD2L1/TTK/UBE2C/DUSP1/ZWINT/CCNB1/MAP3K20/AURKB/CDC20/SPC24	14
BP	GO:0034765	regulation of monoatomic ion transmembrane transport	33/941	349/18888	0.000328486657042564	0.00992934517814888	0.00847046274163964	CEMIP/CXCL9/FXYD6/AHNAK/ADRB2/CXCL10/ATP1B2/FHL1/SLMAP/CACNB2/PLN/KCNJ14/KCNJ15/ATP1A2/KCNMB1/DMD/CASQ2/AKAP6/ATP2B4/FLNA/ANK2/JPH2/RYR2/TRPC1/CAV1/SLC8A1/KCNE4/GRIN2A/SCN4B/RELN/FGF14/PDZK1/RGS4	33
BP	GO:0198738	cell-cell signaling by wnt	41/941	468/18888	0.000337614705348494	0.0101177460704669	0.00863118257867212	SOX4/DEPDC1B/SFRP4/CCNE1/TERT/TIAM1/PRKN/LGR5/SCEL/NKD2/LBX2/TGFB1I1/DAAM2/PRICKLE2/DIXDC1/SFRP1/RSPO2/FERMT2/RECK/FRZB/BARX1/MAGI2/NOTUM/FGF2/MCC/DACT3/PPM1N/LRRK2/KREMEN2/AMOTL1/ROR2/TRABD2A/WNT9A/CPE/CAV1/SOX10/ISL1/RAC3/FGF10/LGR6/SHISA3	41
BP	GO:0030595	leukocyte chemotaxis	25/941	237/18888	0.000338728028111906	0.0101177460704669	0.00863118257867212	ANXA1/CXCL9/PTN/CXCL10/DUSP1/CXCL6/S100A9/S100A8/IL23A/KIT/JAM3/CXCL12/CCL20/IL16/ADGRE2/PADI2/SLIT2/ITGA9/MMP28/CCL25/CHGA/IL6/SCG2/THBS4/DPEP1	25
BP	GO:1903779	regulation of cardiac conduction	7/941	28/18888	0.000351015293568575	0.0104230894231421	0.00889166294730055	EHD3/ATP2B4/ANK2/RYR2/TRPC1/SLC8A1/SLC8A2	7
BP	GO:0097529	myeloid leukocyte migration	25/941	239/18888	0.000384647327843256	0.0113549690698992	0.00968662491970921	ANXA1/CXCL9/CXCL10/DUSP1/CXCL6/S100A9/S100A8/IL23A/KIT/JAM3/CXCL12/CCL20/CD177/ROR2/ADGRE2/SLIT2/ITGA9/RAC3/MMP28/CCL25/CHGA/IL6/SCG2/THBS4/DPEP1	25
BP	GO:0014059	regulation of dopamine secretion	8/941	37/18888	0.000391236570403267	0.0114823384150912	0.00979528035201816	PRKN/CXCL12/KCNA2/SYT13/SNCG/PRKCB/HTR1B/CNR1	8
BP	GO:0055117	regulation of cardiac muscle contraction	12/941	77/18888	0.000402107108357642	0.0117331600172796	0.0100092496519082	EHD3/PLN/ATP1A2/CTNNA3/DMD/PDE5A/CASQ2/ANK2/RYR2/CAV1/SLC8A1/CHGA	12
BP	GO:0071383	cellular response to steroid hormone stimulus	23/941	213/18888	0.000413256413005702	0.0119571677924956	0.0102003447825297	ANXA1/PER1/KLF9/FAM107A/NR4A3/SCNN1B/LMO3/KANK2/PCK1/PGR/ATP1A2/TP63/SFRP1/NR3C2/AR/HEYL/TCF21/FBXO32/ADTRP/PADI2/SOX10/PDE3A/ISL1	23
BP	GO:0071415	cellular response to purine-containing compound	5/941	14/18888	0.000416890160752619	0.0119571677924956	0.0102003447825297	P2RY1/RYR3/CASQ2/RYR2/SLC8A1	5
BP	GO:2000479	regulation of cAMP-dependent protein kinase activity	5/941	14/18888	0.000416890160752619	0.0119571677924956	0.0102003447825297	ADRB2/PRKAR2B/ATP2B4/MST1/PKIA	5
BP	GO:0001780	neutrophil homeostasis	6/941	21/18888	0.00042820051890479	0.0122121820306858	0.0104178907097205	ANXA1/GCNT4/ITPKB/JAM3/HCAR2/IL6	6
BP	GO:0002444	myeloid leukocyte mediated immunity	15/941	112/18888	0.000440601653713338	0.0124952648760951	0.0106593812261459	FCGR3A/NR4A3/SCNN1B/CXCL6/FOXF1/KIT/NLRP6/DNASE1/CD177/FCER1A/ADGRE2/CD84/PTGDS/CHGA/IL6	15
BP	GO:0030072	peptide hormone secretion	25/941	242/18888	0.000463787708343119	0.0130793315738328	0.0111576331363229	SOX4/KCNA5/IL1RN/TIAM1/PRKN/GHRL/F2RL2/KCNB1/CPLX1/MYRIP/SFRP1/NNAT/ITPR1/ADCY5/FAM3B/GNAZ/CPE/TACR2/PRKCB/RBP4/ISL1/CNR1/CHGA/IL6/BLK	25
BP	GO:0022898	regulation of transmembrane transporter activity	24/941	229/18888	0.000484943075496904	0.0135999591394909	0.0116017667944903	FXYD6/AHNAK/ADRB2/ATP1B2/FHL1/SLMAP/CACNB2/PLN/ATP1A2/DMD/CASQ2/AKAP6/PRRT1/ANK2/JPH2/RYR2/CAV1/NLGN1/KCNE4/SCN4B/RELN/FGF14/PDZK1/CACNG4	24
BP	GO:0015833	peptide transport	27/941	271/18888	0.000497353709218531	0.013808000826085	0.0117792416756013	SOX4/KCNA5/IL1RN/TIAM1/PRKN/GHRL/F2RL2/SLC15A1/S100A8/KCNB1/CPLX1/MYRIP/SFRP1/NNAT/ITPR1/ADCY5/FAM3B/GNAZ/CPE/TACR2/PRKCB/RBP4/ISL1/CNR1/CHGA/IL6/BLK	27
BP	GO:0030071	regulation of mitotic metaphase/anaphase transition	13/941	90/18888	0.000500452642868545	0.013808000826085	0.0117792416756013	TRIP13/NDC80/NUF2/MAD2L1/TTK/UBE2C/DUSP1/ZWINT/CCNB1/MAP3K20/AURKB/CDC20/SPC24	13
BP	GO:0034394	protein localization to cell surface	11/941	68/18888	0.000500567383354508	0.013808000826085	0.0117792416756013	GPM6B/TMEM35A/FLNA/PRRT1/ANK2/JAM3/CD177/RIC3/GPIHBP1/FCN1/FGF10	11
BP	GO:0086012	membrane depolarization during cardiac muscle cell action potential	6/941	22/18888	0.000564135597888356	0.0153932783683266	0.0131316001761665	SLMAP/CACNB2/ATP1A2/ANK2/SLC8A1/SCN4B	6
BP	GO:0090231	regulation of spindle checkpoint	6/941	22/18888	0.000564135597888356	0.0153932783683266	0.0131316001761665	NDC80/MAD2L1/DUSP1/ZWINT/CCNB1/AURKB	6
BP	GO:0060306	regulation of membrane repolarization	8/941	39/18888	0.00057080186333931	0.01549143981794	0.0132153391223606	KCNA5/CASQ2/AKAP6/FLNA/ANK2/CAV1/KCNE4/SCN4B	8
BP	GO:0099565	chemical synaptic transmission, postsynaptic	15/941	115/18888	0.000585791756008644	0.015813244835998	0.0134898625039761	ADRB2/GHRL/DMPK/INSYN1/GRIK5/LRRK2/CHRNB4/NLGN1/GRIN2A/SLC8A2/GLRB/RELN/RIMS1/RGS4/CHRNA3	15
BP	GO:0044772	mitotic cell cycle phase transition	39/941	451/18888	0.000600598200223311	0.0161267006102515	0.0137572633656975	TRIP13/NDC80/NUF2/DBF4/CDK1/MAD2L1/TTK/UBE2C/AURKA/PKMYT1/KCNA5/HSPA2/CCNE1/FAM107A/TERT/ADAMTS1/CHEK2/DUSP1/CDKN2A/ZWINT/CCNB1/CCNP/RCC1/CDC25C/CDKN3/FHL1/MAP3K20/AURKB/CKS2/ID4/KANK2/CDC20/SPC24/UBE2S/PBX1/FBXL7/PKIA/TM4SF5/FGF10	39
BP	GO:0098900	regulation of action potential	10/941	59/18888	0.000610332686109381	0.016301372484022	0.0139062713387551	CD36/KCNB1/CTNNA3/FLNA/ANK2/RYR2/CAV1/SLC8A2/CNR1/TACR1	10
BP	GO:0098815	modulation of excitatory postsynaptic potential	9/941	49/18888	0.000618508913371633	0.0164328052352632	0.0140183931556972	ADRB2/DMPK/LRRK2/NLGN1/GRIN2A/SLC8A2/RELN/RIMS1/RGS4	9
BP	GO:0071621	granulocyte chemotaxis	16/941	128/18888	0.000628945790766657	0.0166226091716758	0.0141803098926778	ANXA1/CXCL9/CXCL10/CXCL6/S100A9/S100A8/IL23A/JAM3/CCL20/ADGRE2/SLIT2/ITGA9/CCL25/SCG2/THBS4/DPEP1	16
BP	GO:0001822	kidney development	30/941	319/18888	0.000657060031338225	0.0172752033239342	0.014737020768666	HOXC11/SOX4/GCNT4/ADAMTS1/ZBTB16/BMP6/BMPER/PDGFRB/MME/KANK2/CC2D2A/ITGA8/EPHA7/PBX1/TNS2/SFRP1/GFRA1/MAGI2/FGF2/ACTA2/HEYL/LRRK2/TCF21/TMEM59L/AGTR1/SLIT2/SIX2/FGF10/DCHS2/RGN	30
BP	GO:0071772	response to BMP	20/941	180/18888	0.000667588200423598	0.0173670522569496	0.0148153746732799	SFRP4/COMP/TMEM100/BMP6/TGFBR3/GPR155/BMPER/RGMB/RBPMS2/SFRP1/GDF7/HEYL/SPART/CHRDL1/RGMA/SMAD9/SLC39A5/GREM2/USP9Y/GATA5	20
BP	GO:0071773	cellular response to BMP stimulus	20/941	180/18888	0.000667588200423598	0.0173670522569496	0.0148153746732799	SFRP4/COMP/TMEM100/BMP6/TGFBR3/GPR155/BMPER/RGMB/RBPMS2/SFRP1/GDF7/HEYL/SPART/CHRDL1/RGMA/SMAD9/SLC39A5/GREM2/USP9Y/GATA5	20
BP	GO:0097530	granulocyte migration	18/941	154/18888	0.000670874641462991	0.0173670522569496	0.0148153746732799	ANXA1/CXCL9/CXCL10/CXCL6/S100A9/S100A8/IL23A/JAM3/CCL20/CD177/ADGRE2/SLIT2/ITGA9/RAC3/CCL25/SCG2/THBS4/DPEP1	18
BP	GO:0086091	regulation of heart rate by cardiac conduction	8/941	40/18888	0.000682740714788304	0.0174947976053368	0.0149243508640072	KCNA5/CACNB2/CTNNA3/ANK2/CAV1/ISL1/KCNE4/SCN4B	8
BP	GO:1903115	regulation of actin filament-based movement	8/941	40/18888	0.000682740714788304	0.0174947976053368	0.0149243508640072	TNNC1/PLN/ATP1A2/CTNNA3/ACTA2/ANK2/RYR2/CAV1	8
BP	GO:0007080	mitotic metaphase chromosome alignment	10/941	60/18888	0.000700230207721851	0.0178523337807066	0.0152293555544396	NDC80/NUF2/KAT2B/SKA3/SKA1/KIFC1/CCNB1/AURKB/CDT1/PSRC1	10
BP	GO:0050921	positive regulation of chemotaxis	17/941	142/18888	0.000712118356074754	0.0180641882485696	0.0154100830187877	PTN/TIAM1/CXCL10/PDGFRB/IL23A/SMOC2/SUCNR1/LPAR1/FGF2/CXCL12/IL16/SLIT2/NTRK3/FGF10/IL6/SCG2/THBS4	17
BP	GO:0043114	regulation of vascular permeability	9/941	50/18888	0.000721428471182419	0.0180969111533752	0.0154379980666565	BMP6/NPR1/PDE2A/FERMT2/TACR2/AKAP12/PDE3A/SLIT2/TACR1	9
BP	GO:0010639	negative regulation of organelle organization	33/941	365/18888	0.000723795718868905	0.0180969111533752	0.0154379980666565	TPX2/TRIP13/NDC80/NUF2/KAT2B/GSN/MAD2L1/TOM1L2/TTK/PRKN/DUSP1/ZWINT/CCNB1/PIF1/CGNL1/AURKB/STMN1/TMOD1/KANK2/CLIP3/CDC20/SPC24/SVIL/LMOD1/LPAR1/BMERB1/LRRK2/MAPT/MAP1B/STMN2/CORO2B/IQCJ-SCHIP1/SLIT2	33
BP	GO:0003205	cardiac chamber development	19/941	168/18888	0.00072514697718134	0.0180969111533752	0.0154379980666565	SALL4/SOX4/ADAMTS1/TPM1/FOXF1/PDE2A/TGFBR3/TNNC1/NRP2/ANK2/HEYL/RYR2/ZFPM2/MYOCD/HAND2/CPE/RBP4/ISL1/SLIT2	19
BP	GO:0003208	cardiac ventricle morphogenesis	11/941	71/18888	0.000729934809321178	0.0180969111533752	0.0154379980666565	SOX4/TPM1/FOXF1/TGFBR3/TNNC1/HEYL/RYR2/ZFPM2/HAND2/CPE/ISL1	11
BP	GO:0097164	ammonium ion metabolic process	6/941	23/18888	0.000731333176562707	0.0180969111533752	0.0154379980666565	HDC/DMGDH/RNF180/BCHE/GRIN2A/TPH1	6
BP	GO:0060485	mesenchyme development	31/941	336/18888	0.000741596400578764	0.0182613591713249	0.0155782843377033	HMGA2/SOX4/TIAM1/TMEM100/NCAM1/FOXF2/FOXF1/TGFBR3/TGFB1I1/TNXB/SFRP1/FERMT2/FLNA/FRZB/NRP2/RADIL/DACT3/ACTA2/HEYL/ACTC1/TCF21/ZFPM2/RBM24/HAND2/SOX10/ISL1/ACTG2/SIX2/FGF10/IL6/GATA5	31
BP	GO:0007091	metaphase/anaphase transition of mitotic cell cycle	13/941	94/18888	0.000763908752689593	0.018719472735811	0.0159690889486618	TRIP13/NDC80/NUF2/MAD2L1/TTK/UBE2C/DUSP1/ZWINT/CCNB1/MAP3K20/AURKB/CDC20/SPC24	13
BP	GO:0031960	response to corticosteroid	18/941	156/18888	0.00078181021177889	0.0190655939568108	0.0162643558422956	ANXA1/IL1RN/KLF9/FAM107A/SCNN1B/BMP6/GHR/PCK1/CLDN1/MAOB/FBXO32/BCHE/ISL1/SLIT2/CDO1/HTR1B/PTGDS/IL6	18
BP	GO:0051983	regulation of chromosome segregation	16/941	131/18888	0.00081185272798889	0.0197030412061919	0.0168081452945473	TRIP13/NDC80/NUF2/KAT2B/MAPK15/CDK1/MAD2L1/TTK/UBE2C/DUSP1/ZWINT/CCNB1/MAP3K20/AURKB/CDC20/SPC24	16
BP	GO:0006816	calcium ion transport	37/941	428/18888	0.000824319205618547	0.0197785403723252	0.0168725516438365	CEMIP/CXCL9/AHNAK/CXCL10/PDGFRB/CACNB2/CACNA2D3/PLN/ATP1A2/RYR3/DMD/CASQ2/AKAP6/ATP2B4/FLNA/CYSLTR1/NCS1/FGF2/CACNA1H/ANK2/ITPR1/TRPC4/CXCL12/JPH2/RYR2/MYLK/IL16/TRPC1/CD84/CAV1/PRKCB/SLC8A1/GRIN2A/SLC8A2/RGS4/CACNG4/PLCH2	37
BP	GO:1904062	regulation of monoatomic cation transmembrane transport	29/941	309/18888	0.000828070421841884	0.0197785403723252	0.0168725516438365	CEMIP/CXCL9/FXYD6/AHNAK/CXCL10/ATP1B2/FHL1/SLMAP/CACNB2/PLN/ATP1A2/KCNMB1/DMD/CASQ2/AKAP6/ATP2B4/FLNA/ANK2/JPH2/RYR2/TRPC1/CAV1/SLC8A1/KCNE4/GRIN2A/SCN4B/FGF14/PDZK1/RGS4	29
BP	GO:0090130	tissue migration	34/941	383/18888	0.00083499705060164	0.0197785403723252	0.0168725516438365	FAP/SASH1/ANXA1/PTN/RHOB/S100A9/FOXF1/TGFBR3/BMPER/KANK2/DAAM2/FAT2/APOA1/ATOH8/SMOC2/ATP2B4/KIT/NRP2/DCN/FGF2/MCC/ACTA2/RHOJ/ACTC1/FGFBP1/ADTRP/EGR3/KRT16/S100A2/ACTG2/SLIT2/FGF10/TACR1/SCG2	34
BP	GO:0030534	adult behavior	17/941	144/18888	0.00083520679485268	0.0197785403723252	0.0168725516438365	DAB1/LGI4/PRKN/GHRL/TMOD1/ATP1A2/CHL1/CXCL12/RNF180/TUBA1A/NRXN3/SNCG/CHRNB4/PPP1R1B/GLRB/SLITRK5/CHRNA3	17
BP	GO:0034374	low-density lipoprotein particle remodeling	5/941	16/18888	0.000836830522257287	0.0197785403723252	0.0168725516438365	MTTP/APOB/LIPC/PLA2G5/AGTR1	5
BP	GO:0010644	cell communication by electrical coupling	7/941	32/18888	0.000838472194864814	0.0197785403723252	0.0168725516438365	ATP1B2/ATP1A2/CASQ2/RYR2/GJC1/CAV1/SLC8A1	7
BP	GO:0060079	excitatory postsynaptic potential	14/941	107/18888	0.000854630505492101	0.0200659292638331	0.017117715534728	ADRB2/GHRL/DMPK/GRIK5/LRRK2/CHRNB4/NLGN1/GRIN2A/SLC8A2/GLRB/RELN/RIMS1/RGS4/CHRNA3	14
BP	GO:0045055	regulated exocytosis	23/941	225/18888	0.000887935291456648	0.0207513766262646	0.0177024526186606	FCGR3A/NR4A3/P2RY1/FOXF1/KCNB1/CPLX1/KIT/GRIK5/LRRK2/CD177/FCER1A/ADGRE2/SYT13/CD84/PRKCB/NLGN1/RIMS3/UNC13A/HTR1B/RIMS1/PTGDS/CHGA/TPH1	23
BP	GO:0002028	regulation of sodium ion transport	12/941	84/18888	0.00089902702271079	0.0209137714776224	0.0178409873873871	PER1/FXYD6/ADRB2/ATP1B2/DMPK/SLMAP/ATP1A2/DMD/ATP2B4/CNTN1/SCN4B/FGF14	12
BP	GO:0007189	adenylate cyclase-activating G protein-coupled receptor signaling pathway	18/941	158/18888	0.000908107034546688	0.0210280931669343	0.0179385122082593	CXCL9/ADRB2/CXCL10/LGR5/PTH1R/PLN/ATP2B4/LPAR1/ADCY5/ADRA1D/ADGRE2/ADGRL3/PTGER3/PTGFR/ADGRG2/ADCY2/CNR1/CHGA	18
BP	GO:0006631	fatty acid metabolic process	35/941	401/18888	0.000951975113745935	0.0219171789814592	0.0186969678899719	BAAT/KAT2B/CYP2D6/ELOVL4/PTGS1/ACBD7/NR4A3/APOC1/PDK4/ACACB/CD36/CES2/AKR1C1/TRIB3/GSTA1/CYP4B1/PCK1/TNXB/PRKAR2B/FMO2/FABP1/AKR1C2/LIPC/ADTRP/CAV1/PLA2G5/PNPLA3/HPGDS/MLXIPL/CNR1/TYRP1/PTGDS/RGN/CYP2B6/PTGIS	35
BP	GO:0021782	glial cell development	16/941	133/18888	0.000957444207412817	0.0219171789814592	0.0186969678899719	GPM6B/SOX4/MAL/LGI4/ASPA/S100A9/S100A8/ID4/PRDM8/LPAR1/TSPAN2/MAPT/ROR2/CNTN1/SOX10/IL6	16
BP	GO:0014046	dopamine secretion	8/941	42/18888	0.000959527843681156	0.0219171789814592	0.0186969678899719	PRKN/CXCL12/KCNA2/SYT13/SNCG/PRKCB/HTR1B/CNR1	8
BP	GO:0030177	positive regulation of Wnt signaling pathway	17/941	146/18888	0.000976006980636446	0.0221931677398774	0.0189324066277084	SOX4/DEPDC1B/SFRP4/TERT/LGR5/SCEL/LBX2/DAAM2/DIXDC1/SFRP1/RSPO2/RECK/FGF2/PPM1N/LRRK2/FGF10/LGR6	17
BP	GO:0031055	chromatin remodeling at centromere	4/941	10/18888	0.00100951316479057	0.0226489886927236	0.0193212554720853	HJURP/CENPA/OIP5/CENPW	4
BP	GO:0034080	CENP-A containing chromatin assembly	4/941	10/18888	0.00100951316479057	0.0226489886927236	0.0193212554720853	HJURP/CENPA/OIP5/CENPW	4
BP	GO:0048251	elastic fiber assembly	4/941	10/18888	0.00100951316479057	0.0226489886927236	0.0193212554720853	THSD4/TNXB/MFAP4/MYH11	4
BP	GO:0034368	protein-lipid complex remodeling	7/941	33/18888	0.00101900806644802	0.0226605846670908	0.0193311476922739	MTTP/APOC1/APOB/APOA1/LIPC/PLA2G5/AGTR1	7
BP	GO:0034369	plasma lipoprotein particle remodeling	7/941	33/18888	0.00101900806644802	0.0226605846670908	0.0193311476922739	MTTP/APOC1/APOB/APOA1/LIPC/PLA2G5/AGTR1	7
BP	GO:0002791	regulation of peptide secretion	21/941	200/18888	0.00103770899785269	0.0228852510280055	0.0195228046450018	SOX4/KCNA5/TIAM1/PRKN/GHRL/F2RL2/S100A8/KCNB1/MYRIP/SFRP1/NNAT/ITPR1/ADCY5/GNAZ/PRKCB/RBP4/ISL1/CNR1/CHGA/IL6/BLK	21
BP	GO:0051384	response to glucocorticoid	16/941	134/18888	0.00103817798839407	0.0228852510280055	0.0195228046450018	ANXA1/IL1RN/KLF9/FAM107A/BMP6/GHR/PCK1/CLDN1/MAOB/FBXO32/BCHE/ISL1/SLIT2/CDO1/PTGDS/IL6	16
BP	GO:0030278	regulation of ossification	15/941	122/18888	0.00108991130545072	0.0239211837822402	0.0204065315816883	GPM6B/COMP/PTN/ADRB2/ZBTB16/BMP6/PBX1/SFRP1/NOTUM/KREMEN2/SLC8A1/KL/SIX2/TACR1/TPH1	15
BP	GO:0006942	regulation of striated muscle contraction	13/941	98/18888	0.00113525864741802	0.0246378922914229	0.0210179367262097	EHD3/DMPK/PLN/ATP1A2/CTNNA3/DMD/PDE5A/CASQ2/ANK2/RYR2/CAV1/SLC8A1/CHGA	13
BP	GO:0048557	embryonic digestive tract morphogenesis	5/941	17/18888	0.0011372085784274	0.0246378922914229	0.0210179367262097	FOXF1/RBPMS2/TCF21/SIX2/FGF10	5
BP	GO:0072578	neurotransmitter-gated ion channel clustering	5/941	17/18888	0.0011372085784274	0.0246378922914229	0.0210179367262097	FRRS1L/CHRDL1/NLGN1/GLRB/RELN	5
BP	GO:0090087	regulation of peptide transport	21/941	202/18888	0.00117777806722471	0.0252006563166669	0.0214980158877897	SOX4/KCNA5/TIAM1/PRKN/GHRL/F2RL2/S100A8/KCNB1/MYRIP/SFRP1/NNAT/ITPR1/ADCY5/GNAZ/PRKCB/RBP4/ISL1/CNR1/CHGA/IL6/BLK	21
BP	GO:0046716	muscle cell cellular homeostasis	6/941	25/18888	0.00117816063604069	0.0252006563166669	0.0214980158877897	PLN/CFL2/DMD/ALDOA/CAV1/LARGE2	6
BP	GO:0086064	cell communication by electrical coupling involved in cardiac conduction	6/941	25/18888	0.00117816063604069	0.0252006563166669	0.0214980158877897	ATP1B2/ATP1A2/RYR2/GJC1/CAV1/SLC8A1	6
BP	GO:0009612	response to mechanical stimulus	22/941	216/18888	0.00119196688554011	0.0253883917223901	0.0216581680157431	PPL/GSN/KCNA5/PTN/P2RY1/CXCL10/BMP6/SCEL/PDE2A/TXNIP/ATP1A2/DMD/KIT/FGF2/CXCL12/RYR2/TLR3/MAP1B/TUBA1A/SLC8A1/PDZD7/TACR1	22
BP	GO:0009954	proximal/distal pattern formation	7/941	34/18888	0.00122873267177563	0.0260615232232075	0.0222323987626454	HOXC10/HOXC9/HOXC11/HOXA10/PBX1/TP63/FGF10	7
BP	GO:0097305	response to alcohol	25/941	259/18888	0.00124048736809345	0.0262007541177228	0.0223511729701401	CDK1/KLF9/SCNN1B/S100A8/TGFBR3/GPR155/SLC2A4/PCK1/KCNMB1/SFRP1/CLDN1/AKR1C2/MAOB/ADCY5/PRKCB/SLIT2/GRIN2A/CDO1/PTGFR/HTR1B/RGS4/ADCY2/CNR1/TACR1/ADH6	25
BP	GO:0046717	acid secretion	8/941	44/18888	0.00131954627279993	0.0277544566045586	0.0236765956229146	SLC51B/HRH2/ACACB/GHRL/SLC9A4/TRPC4/PTGER3/HTR1B	8
BP	GO:0019935	cyclic-nucleotide-mediated signaling	13/941	100/18888	0.00137114109909872	0.0287200011130719	0.024500276201847	CD36/NPR1/PDE2A/CAP2/RASD2/PDE5A/AKAP6/LPAR1/PDE1C/IRAG1/PDE3A/PDE7B/ADCY2	13
BP	GO:0051656	establishment of organelle localization	39/941	472/18888	0.00140883412709576	0.0293875812957827	0.0250697712655448	NDC80/NUF2/KAT2B/SGO1/NEK2/MAPK15/SKA3/MAD2L1/SKA1/CENPA/NR4A3/KNSTRN/PRKN/KIFC1/ZWINT/CCNB1/FOXF1/AURKB/CDT1/SLC2A4/NTN1/FYCO1/SPC24/PSRC1/KIT/GEM/LRRK2/DYNC1I1/MAPT/MAP1B/FCER1A/ADGRE2/TUBA1A/CD84/NLGN1/UNC13A/FGF10/PTGDS/CHGA	39
BP	GO:0022010	central nervous system myelination	6/941	26/18888	0.00146777480596632	0.0303660951660573	0.0259045156652641	GPM6B/MAL/ASPA/ID4/CNTN1/SOX10	6
BP	GO:0032291	axon ensheathment in central nervous system	6/941	26/18888	0.00146777480596632	0.0303660951660573	0.0259045156652641	GPM6B/MAL/ASPA/ID4/CNTN1/SOX10	6
BP	GO:0031100	animal organ regeneration	10/941	66/18888	0.00149733968747225	0.0304088225024884	0.0259409652301443	BAAT/CDK1/AURKA/NR4A3/TGFBR3/CLDN1/CXCL12/VTN/RGN/IL6	10
BP	GO:0003300	cardiac muscle hypertrophy	13/941	101/18888	0.00150354718256502	0.0304088225024884	0.0259409652301443	NR4A3/TIAM1/ACACB/PI16/SORBS2/PDE5A/MEIS1/AKAP6/ATP2B4/RYR2/HAND2/RGS4/GATA5	13
BP	GO:0043116	negative regulation of vascular permeability	5/941	18/18888	0.00151052770234154	0.0304088225024884	0.0259409652301443	PDE2A/FERMT2/AKAP12/PDE3A/SLIT2	5
BP	GO:0043117	positive regulation of vascular permeability	5/941	18/18888	0.00151052770234154	0.0304088225024884	0.0259409652301443	BMP6/PDE2A/TACR2/PDE3A/TACR1	5
BP	GO:0098659	inorganic cation import across plasma membrane	15/941	126/18888	0.0015153762718886	0.0304088225024884	0.0259409652301443	SCNN1B/SLC5A6/ATP1B2/SLC9A9/KCNJ14/KCNJ15/ATP1A2/ATP2B4/SLC9A4/CACNA1H/SLC8A1/SLC8A2/KCNK9/ABCC9/SLC39A5	15
BP	GO:0099587	inorganic ion import across plasma membrane	15/941	126/18888	0.0015153762718886	0.0304088225024884	0.0259409652301443	SCNN1B/SLC5A6/ATP1B2/SLC9A9/KCNJ14/KCNJ15/ATP1A2/ATP2B4/SLC9A4/CACNA1H/SLC8A1/SLC8A2/KCNK9/ABCC9/SLC39A5	15
BP	GO:0048671	negative regulation of collateral sprouting	4/941	11/18888	0.00152405548596069	0.0304088225024884	0.0259409652301443	EPHA7/SPART/PTPRS/RGMA	4
BP	GO:0071313	cellular response to caffeine	4/941	11/18888	0.00152405548596069	0.0304088225024884	0.0259409652301443	RYR3/CASQ2/RYR2/SLC8A1	4
BP	GO:0086070	SA node cell to atrial cardiac muscle cell communication	4/941	11/18888	0.00152405548596069	0.0304088225024884	0.0259409652301443	KCNA5/ANK2/RYR2/GJC1	4
BP	GO:0090068	positive regulation of cell cycle process	25/941	263/18888	0.00153630036747486	0.030532457696902	0.0260464351568158	RAD51AP1/NDC80/KAT2B/MAPK15/DBF4/CDK1/MAD2L1/UBE2C/AURKA/KCNA5/HSPA2/CCNE1/TERT/ADAMTS1/SOX15/BTC/CCNB1/CDC25C/MAP3K20/AURKB/PDGFRB/CDC20/SVIL/PBX1/FGF10	25
BP	GO:1903034	regulation of response to wounding	19/941	179/18888	0.00155088809835767	0.0307015024333706	0.0261906427673115	FAP/ANXA1/PTN/CD36/DUOX1/MMRN1/SMOC2/FERMT2/FLNA/CLDN1/FGF2/SERPINB2/MYLK/ADTRP/PTPRS/CAV1/RGMA/PROC/VTN	19
BP	GO:0050890	cognition	29/941	322/18888	0.00156605773111225	0.0308807008853697	0.0263435122449845	KAT2B/S100B/PTN/FAM107A/PRKN/C1QL1/GPR155/MME/SLC2A4/PTCHD1/ITGA8/ATP1A2/PRKAR2B/KIT/PRRT1/SOBP/CHL1/VLDLR/MAPT/BCHE/TUBA1A/NRXN3/TACR2/PPP1R1B/GRIN2A/SLC8A2/RELN/CNR1/TACR1	29
BP	GO:0003206	cardiac chamber morphogenesis	15/941	127/18888	0.00164113300769362	0.0321102303210752	0.0273923914095251	SOX4/ADAMTS1/TPM1/FOXF1/TGFBR3/TNNC1/NRP2/HEYL/RYR2/ZFPM2/HAND2/CPE/RBP4/ISL1/SLIT2	15
BP	GO:0003231	cardiac ventricle development	15/941	127/18888	0.00164113300769362	0.0321102303210752	0.0273923914095251	SALL4/SOX4/TPM1/FOXF1/PDE2A/TGFBR3/TNNC1/HEYL/RYR2/ZFPM2/MYOCD/HAND2/CPE/ISL1/SLIT2	15
BP	GO:0006584	catecholamine metabolic process	9/941	56/18888	0.00167095112289307	0.0323178592657633	0.0275695141913916	SULT1A1/PRKN/NPR1/HDC/MAOB/RNF180/HAND2/KL/GRIN2A	9
BP	GO:0009712	catechol-containing compound metabolic process	9/941	56/18888	0.00167095112289307	0.0323178592657633	0.0275695141913916	SULT1A1/PRKN/NPR1/HDC/MAOB/RNF180/HAND2/KL/GRIN2A	9
BP	GO:0015872	dopamine transport	9/941	56/18888	0.00167095112289307	0.0323178592657633	0.0275695141913916	MAPK15/PRKN/CXCL12/KCNA2/SYT13/SNCG/PRKCB/HTR1B/CNR1	9
BP	GO:0034367	protein-containing complex remodeling	7/941	36/18888	0.00174843917485779	0.0336874845598554	0.0287379054413147	MTTP/APOC1/APOB/APOA1/LIPC/PLA2G5/AGTR1	7
BP	GO:0034767	positive regulation of monoatomic ion transmembrane transport	17/941	154/18888	0.00175857902074828	0.0337540186187731	0.0287946638938612	CEMIP/CXCL9/ADRB2/CXCL10/ATP1B2/CACNB2/KCNMB1/DMD/AKAP6/FLNA/ANK2/JPH2/RYR2/TRPC1/CAV1/RELN/PDZK1	17
BP	GO:0046683	response to organophosphorus	15/941	128/18888	0.00177549414268393	0.033949600122229	0.0289615093210524	RFC3/PER1/P2RY1/AKR1C1/PDE2A/DUOX1/PCK1/RYR3/AKAP6/LPAR1/SLC26A3/AQP9/PDE3A/CDO1/ABCC9	15
BP	GO:0030509	BMP signaling pathway	18/941	168/18888	0.00183339411502427	0.0349244282741227	0.0297931095315364	SFRP4/COMP/TMEM100/BMP6/TGFBR3/GPR155/BMPER/RGMB/RBPMS2/SFRP1/GDF7/SPART/CHRDL1/RGMA/SMAD9/SLC39A5/GREM2/USP9Y	18
BP	GO:0048588	developmental cell growth	23/941	238/18888	0.0018761094521917	0.0354745147840905	0.0302623738388761	AURKA/S100B/TIAM1/PI16/PRKN/FLRT1/NTN1/SORBS2/EPHA7/NDN/MEIS1/AKAP6/NRP2/SPART/CXCL12/MAPT/MAP1B/PTPRS/RGMA/SLIT2/UNC13A/RIMS1/RGS4	23
BP	GO:1901990	regulation of mitotic cell cycle phase transition	31/941	356/18888	0.00187632635644853	0.0354745147840905	0.0302623738388761	TRIP13/NDC80/NUF2/CDK1/MAD2L1/TTK/UBE2C/AURKA/PKMYT1/KCNA5/HSPA2/CCNE1/FAM107A/TERT/ADAMTS1/CHEK2/DUSP1/CDKN2A/ZWINT/CCNB1/CDC25C/FHL1/MAP3K20/AURKB/KANK2/CDC20/SPC24/PBX1/PKIA/TM4SF5/FGF10	31
BP	GO:0051225	spindle assembly	15/941	129/18888	0.00191890918664708	0.0359661980338781	0.0306818158638326	TPX2/NDC80/NEK2/MAPK15/MYBL2/AURKA/PRC1/CCDC69/CHEK2/KIFC1/RCC1/AURKB/CDC20/FLNA/STARD9	15
BP	GO:1990266	neutrophil migration	15/941	129/18888	0.00191890918664708	0.0359661980338781	0.0306818158638326	CXCL9/CXCL10/CXCL6/S100A9/S100A8/IL23A/JAM3/CCL20/CD177/SLIT2/ITGA9/RAC3/CCL25/THBS4/DPEP1	15
BP	GO:0016049	cell growth	40/941	496/18888	0.00192370710561551	0.0359661980338781	0.0306818158638326	AURKA/S100B/FAM107A/TIAM1/PI16/PRKN/FLRT1/CDKN2A/CRYAB/S100A9/NPR1/FHL1/S100A8/RERG/NTN1/SORBS2/LTBP4/EPHA7/MUC12/PSRC1/NDN/SFRP1/MEIS1/AKAP6/FRZB/NRP2/DACT3/SPART/CXCL12/MAPT/MAP1B/MYOCD/PTPRS/RGMA/AGTR1/RASGRP2/SLIT2/UNC13A/RIMS1/RGS4	40
BP	GO:0007204	positive regulation of cytosolic calcium ion concentration	18/941	169/18888	0.00195898934115895	0.0363020659057368	0.0309683358954811	P2RY1/CCR8/CD36/GHRL/CYSLTR1/LPAR1/ADCY5/JPH2/RYR2/ADRA1D/PTGER3/CAV1/RIC3/FPR3/SLC8A1/AGTR1/PTGFR/TACR1	18
BP	GO:0014897	striated muscle hypertrophy	13/941	104/18888	0.00196584076054968	0.0363020659057368	0.0309683358954811	NR4A3/TIAM1/ACACB/PI16/SORBS2/PDE5A/MEIS1/AKAP6/ATP2B4/RYR2/HAND2/RGS4/GATA5	13
BP	GO:0051447	negative regulation of meiotic cell cycle	5/941	19/18888	0.00196670111830402	0.0363020659057368	0.0309683358954811	TRIP13/TTK/PKMYT1/DUSP1/ZWINT	5
BP	GO:0030111	regulation of Wnt signaling pathway	30/941	342/18888	0.00197043701627811	0.0363020659057368	0.0309683358954811	SOX4/DEPDC1B/SFRP4/TERT/TIAM1/PRKN/LGR5/SCEL/NKD2/LBX2/DAAM2/DIXDC1/SFRP1/RSPO2/RECK/FRZB/BARX1/NOTUM/FGF2/MCC/DACT3/PPM1N/LRRK2/TRABD2A/CAV1/SOX10/ISL1/FGF10/LGR6/SHISA3	30
BP	GO:0090276	regulation of peptide hormone secretion	20/941	197/18888	0.00202533966730619	0.0371778714202241	0.0317154625031564	SOX4/KCNA5/TIAM1/PRKN/GHRL/F2RL2/KCNB1/MYRIP/SFRP1/NNAT/ITPR1/ADCY5/GNAZ/PRKCB/RBP4/ISL1/CNR1/CHGA/IL6/BLK	20
BP	GO:0014003	oligodendrocyte development	8/941	47/18888	0.00205245007663702	0.0375390144451583	0.0320235441019147	GPM6B/MAL/ASPA/ID4/PRDM8/LPAR1/CNTN1/SOX10	8
BP	GO:0033144	negative regulation of intracellular steroid hormone receptor signaling pathway	7/941	37/18888	0.00206511978256385	0.0376210774583621	0.032093549896188	PER1/KANK2/TP63/SFRP1/HEYL/TCF21/ISL1	7
BP	GO:0055007	cardiac muscle cell differentiation	15/941	130/18888	0.00207184222135988	0.0376210774583621	0.032093549896188	NEB/CDK1/PI16/PDGFRB/SORBS2/MEIS1/AKAP6/ASB2/BVES/MYH11/ACTC1/MYOCD/SLC8A1/ISL1/RGS4	15
BP	GO:0050708	regulation of protein secretion	25/941	269/18888	0.0020928466467449	0.037866271945406	0.032302718852418	SOX4/KCNA5/TIAM1/PRKN/GHRL/BMP6/F2RL2/KCNB1/MYOM1/MYRIP/SFRP1/APBB1/NNAT/ITPR1/ADCY5/HCAR2/ADTRP/GNAZ/PRKCB/RBP4/ISL1/CNR1/CHGA/IL6/BLK	25
BP	GO:0051445	regulation of meiotic cell cycle	10/941	69/18888	0.0021102206574104	0.0380442638521704	0.0324545590581427	TRIP13/RAD51AP1/MAPK15/TTK/PKMYT1/DUSP1/ZWINT/CDC25C/CDC20/PDE3A	10
BP	GO:0032956	regulation of actin cytoskeleton organization	30/941	344/18888	0.0021523496946625	0.0386656984293819	0.0329846885216868	NEB/GPM6B/GSN/FAM107A/TPM1/PRKN/CGNL1/STMN1/PDGFRB/TMOD1/KANK2/DAAM2/APOA1/SVIL/CFL2/DIXDC1/SFRP1/FERMT2/LMOD1/FLNA/LPAR1/JAM3/CXCL12/CORO2B/SMIM22/SLIT2/RAC3/SYNPO2/RGS4/TACR1	30
BP	GO:0014831	gastro-intestinal system smooth muscle contraction	4/941	12/18888	0.00219643312581151	0.0388025019820804	0.0331013920278361	GHRL/KIT/PTGER3/TACR2	4
BP	GO:0035112	genitalia morphogenesis	4/941	12/18888	0.00219643312581151	0.0388025019820804	0.0331013920278361	TP63/AR/RBP4/FGF10	4
BP	GO:0086067	AV node cell to bundle of His cell communication	4/941	12/18888	0.00219643312581151	0.0388025019820804	0.0331013920278361	CACNB2/RYR2/GJC1/SCN4B	4
BP	GO:0051899	membrane depolarization	12/941	93/18888	0.00220344582349908	0.0388025019820804	0.0331013920278361	FHL1/SLMAP/CACNB2/ATP1A2/DCN/ANK2/LRRK2/CAV1/CHRNB4/SLC8A1/SCN4B/CHRNA3	12
BP	GO:2001251	negative regulation of chromosome organization	12/941	93/18888	0.00220344582349908	0.0388025019820804	0.0331013920278361	TRIP13/NDC80/NUF2/MAD2L1/TTK/DUSP1/ZWINT/CCNB1/PIF1/AURKB/CDC20/SPC24	12
BP	GO:0086010	membrane depolarization during action potential	6/941	28/18888	0.00220608519589086	0.0388025019820804	0.0331013920278361	SLMAP/CACNB2/ATP1A2/ANK2/SLC8A1/SCN4B	6
BP	GO:0034764	positive regulation of transmembrane transport	21/941	213/18888	0.0022728324331368	0.0398377018141478	0.0339844937279336	CEMIP/CXCL9/NR4A3/TERT/ADRB2/CXCL10/ATP1B2/CACNB2/CLIP3/KCNMB1/DMD/AKAP6/FLNA/SORBS1/ANK2/JPH2/RYR2/TRPC1/CAV1/RELN/PDZK1	21
BP	GO:0014896	muscle hypertrophy	13/941	106/18888	0.00233471792227856	0.0406401933505591	0.0346690781126736	NR4A3/TIAM1/ACACB/PI16/SORBS2/PDE5A/MEIS1/AKAP6/ATP2B4/RYR2/HAND2/RGS4/GATA5	13
BP	GO:0048709	oligodendrocyte differentiation	13/941	106/18888	0.00233471792227856	0.0406401933505591	0.0346690781126736	GPM6B/MAL/PTN/ASPA/ID4/PRDM8/DAAM2/LPAR1/TSPAN2/TRPC4/CNTN1/SOX10/VTN	13
BP	GO:2000573	positive regulation of DNA biosynthetic process	10/941	70/18888	0.00235435990875067	0.0408412674205271	0.0348406091036317	RFC3/NEK2/MAPK15/RFC4/CHTF18/FGFR4/AURKB/PDGFRB/SMOC2/FGF2	10
BP	GO:0051651	maintenance of location in cell	22/941	228/18888	0.00237262034524956	0.0410170804891088	0.0349905905999133	CEMIP/GSN/CXCL9/CXCL10/S100A9/S100A8/PLN/ATP1A2/RYR3/DMD/CASQ2/AKAP6/FLNA/FGF2/ANK2/ITPR1/JPH2/RYR2/TRPC1/CAV1/SLC8A1/PLCH2	22
BP	GO:0031644	regulation of nervous system process	14/941	119/18888	0.00239824823307796	0.0410409713160141	0.0350109712348432	ADRB2/TMEM100/GHRL/DMPK/JAM2/LRRK2/CHRNB4/NLGN1/SOX10/GRIN2A/SLC8A2/RELN/RIMS1/RGS4	14
BP	GO:0043502	regulation of muscle adaptation	12/941	94/18888	0.00241410978508095	0.0410409713160141	0.0350109712348432	NR4A3/ACACB/PI16/TNNC1/SGCA/PDE5A/AKAP6/ATP2B4/FBXO32/HAND2/RGS4/GATA5	12
BP	GO:0045666	positive regulation of neuron differentiation	12/941	94/18888	0.00241410978508095	0.0410409713160141	0.0350109712348432	FEZF1/DAB1/S100B/BMP6/NAP1L2/GDF7/FGF2/HEYL/CDON/CXCL12/MAP1B/ZEB1	12
BP	GO:0031099	regeneration	20/941	200/18888	0.00242019029759168	0.0410409713160141	0.0350109712348432	BAAT/CDK1/AURKA/PTN/NR4A3/SOX15/HOPX/TGFBR3/SGCA/FLNA/CLDN1/CXCL12/MAP1B/PTPRS/RGMA/FGF10/VTN/LGR6/RGN/IL6	20
BP	GO:0007409	axonogenesis	37/941	455/18888	0.0024227831719834	0.0410409713160141	0.0350109712348432	FEZF1/DAB1/S100B/TIAM1/NCAM1/STMN1/ARHGEF25/NTN1/PRDM8/MAP6/EPHA7/CDH11/NDN/GDF7/NRP2/APBB1/NPTX1/PALLD/PLPPR4/SPART/NEXN/CHL1/CXCL12/MAPT/MAP1B/PTPRS/NFASC/NRXN3/CNTN1/RGMA/ISL1/SLIT2/RAC3/RELN/SLITRK5/BOC/LGR6	37
BP	GO:1901987	regulation of cell cycle phase transition	37/941	455/18888	0.0024227831719834	0.0410409713160141	0.0350109712348432	TRIP13/EME1/NDC80/NUF2/MAPK15/DBF4/CDK1/MAD2L1/TTK/UBE2C/AURKA/PKMYT1/KCNA5/HSPA2/CCNE1/FAM107A/TERT/ADAMTS1/CHEK2/DUSP1/CDKN2A/ZWINT/CCNB1/CDC25C/FHL1/MAP3K20/AURKB/CDT1/KANK2/CDC20/SPC24/PBX1/ATP2B4/APBB1/PKIA/TM4SF5/FGF10	37
BP	GO:0030593	neutrophil chemotaxis	13/941	107/18888	0.00253941086289796	0.0428727292170866	0.0365735956349782	CXCL9/CXCL10/CXCL6/S100A9/S100A8/IL23A/JAM3/CCL20/SLIT2/ITGA9/CCL25/THBS4/DPEP1	13
BP	GO:0008217	regulation of blood pressure	19/941	187/18888	0.00256433821241019	0.0431492643208221	0.036809500445509	PTGS1/SCNN1B/ADRB2/TPM1/NPR1/ATP1A2/SUCNR1/NCALD/AR/ACTA2/CORO2B/KL/AGTR1/CPA3/ABCC9/CNR1/TACR1/CHGA/KLK1	19
BP	GO:0006814	sodium ion transport	23/941	244/18888	0.00258273666748261	0.043314467433396	0.0369504308678837	SLC23A1/PER1/FXYD6/SCNN1B/ADRB2/SLC5A6/ATP1B2/DMPK/SLC9A9/SLMAP/SCN7A/SLC5A9/ATP1A2/DMD/ATP2B4/SLC9A4/SLC6A14/CNTN1/SLC8A1/SCN4B/SLC8A2/FGF14/PON3	23
BP	GO:0019933	cAMP-mediated signaling	10/941	71/18888	0.00262065910537846	0.0438049243839419	0.037368826769269	PDE2A/CAP2/RASD2/PDE5A/AKAP6/LPAR1/PDE1C/PDE3A/PDE7B/ADCY2	10
BP	GO:0070588	calcium ion transmembrane transport	29/941	334/18888	0.00269528548539234	0.0447785102048526	0.0381993671799258	CEMIP/CXCL9/AHNAK/CXCL10/CACNB2/CACNA2D3/PLN/ATP1A2/RYR3/DMD/CASQ2/AKAP6/ATP2B4/FLNA/NCS1/FGF2/CACNA1H/ANK2/ITPR1/TRPC4/JPH2/RYR2/TRPC1/CAV1/SLC8A1/GRIN2A/SLC8A2/CACNG4/PLCH2	29
BP	GO:0048546	digestive tract morphogenesis	8/941	49/18888	0.00269664562247924	0.0447785102048526	0.0381993671799258	FOXF1/RBPMS2/TP63/SFRP1/TCF21/SOX10/SIX2/FGF10	8
BP	GO:1902414	protein localization to cell junction	13/941	108/18888	0.00275856795523931	0.0456565607804853	0.0389484089901087	CGNL1/DLG2/CPLX1/MPP7/FERMT2/FLNA/NPTX1/JAM3/MAPT/NLGN1/ZDHHC15/GRIN2A/RELN	13
BP	GO:0032409	regulation of transporter activity	24/941	260/18888	0.00277585356851627	0.0457925124636279	0.039064385788786	FXYD6/AHNAK/ADRB2/ATP1B2/FHL1/SLMAP/CACNB2/PLN/ATP1A2/DMD/CASQ2/AKAP6/PRRT1/ANK2/JPH2/RYR2/CAV1/NLGN1/KCNE4/SCN4B/RELN/FGF14/PDZK1/CACNG4	24
BP	GO:0050766	positive regulation of phagocytosis	10/941	72/18888	0.00291052649330393	0.0478577776488541	0.0408262091003133	CD36/LYAR/APOA1/C2/PTX3/TUB/PLA2G5/SIRPB1/C4A/FCN1	10
BP	GO:0060078	regulation of postsynaptic membrane potential	16/941	148/18888	0.00292564649697447	0.04795020622314	0.0409050574816218	ADRB2/GHRL/DMPK/INSYN1/GRIK5/LRRK2/KCNA2/CHRNB4/NLGN1/GRIN2A/SLC8A2/GLRB/RELN/RIMS1/RGS4/CHRNA3	16
BP	GO:0045471	response to ethanol	14/941	122/18888	0.00302408523822324	0.049322105798135	0.0420753888606578	CDK1/S100A8/SLC2A4/KCNMB1/CLDN1/MAOB/PRKCB/GRIN2A/CDO1/HTR1B/RGS4/CNR1/TACR1/ADH6	14
BP	GO:0001696	gastric acid secretion	4/941	13/18888	0.0030484344312635	0.049322105798135	0.0420753888606578	HRH2/GHRL/SLC9A4/PTGER3	4
BP	GO:0051481	negative regulation of cytosolic calcium ion concentration	4/941	13/18888	0.0030484344312635	0.049322105798135	0.0420753888606578	KCNA5/ATP1A2/SLC8A1/KCNK3	4
BP	GO:0070486	leukocyte aggregation	4/941	13/18888	0.0030484344312635	0.049322105798135	0.0420753888606578	NR4A3/S100A9/S100A8/JAM2	4
BP	GO:0008347	glial cell migration	9/941	61/18888	0.00306525746123271	0.0493489386292868	0.0420982792418909	DAB1/TIAM1/P2RY1/ATP1B2/NTN1/NDN/CSPG4/BMERB1/RELN	9
BP	GO:0006693	prostaglandin metabolic process	8/941	50/18888	0.00307287746082149	0.0493489386292868	0.0420982792418909	PTGS1/CES2/AKR1C1/GSTA1/AKR1C2/HPGDS/PTGDS/PTGIS	8
BP	GO:0042060	wound healing	35/941	430/18888	0.00307942069497332	0.0493489386292868	0.0420982792418909	FAP/PPL/ANXA1/COMP/AHNAK/P2RY1/TPM1/CD36/SCUBE1/F2RL2/DGKG/MYL9/CSRP1/DUOX1/FKBP10/MMRN1/SMOC2/FERMT2/FLNA/CLDN1/NLRP6/FGF2/SERPINB2/MYLK/KRT6A/ADTRP/CAV1/PROC/FBLN1/DGKI/FGF10/F13A1/F10/VTN/IL6	35
BP	GO:0007599	hemostasis	22/941	233/18888	0.00309854740326232	0.0494983142141399	0.0422257076174089	FAP/COMP/P2RY1/CD36/SCUBE1/F2RL2/DGKG/MYL9/CSRP1/MMRN1/FLNA/SERPINB2/ADTRP/CAV1/PROC/FBLN1/DGKI/F13A1/F10/VTN/IL6/TPH1	22
BP	GO:0002275	myeloid cell activation involved in immune response	12/941	97/18888	0.00314645792425942	0.0499791575847732	0.0426359024270805	NR4A3/SCNN1B/FOXF1/SUCNR1/KIT/DNASE1/CD177/FCER1A/ADGRE2/CD84/PTGDS/CHGA	12
BP	GO:0051988	regulation of attachment of spindle microtubules to kinetochore	5/941	21/18888	0.00316825087700622	0.0499791575847732	0.0426359024270805	KAT2B/NEK2/KNSTRN/CCNB1/AURKB	5
BP	GO:0090266	regulation of mitotic cell cycle spindle assembly checkpoint	5/941	21/18888	0.00316825087700622	0.0499791575847732	0.0426359024270805	NDC80/MAD2L1/DUSP1/CCNB1/AURKB	5
BP	GO:1903504	regulation of mitotic spindle checkpoint	5/941	21/18888	0.00316825087700622	0.0499791575847732	0.0426359024270805	NDC80/MAD2L1/DUSP1/CCNB1/AURKB	5
CC	GO:0043292	contractile fiber	52/999	250/19894	1.13733865017866e-18	5.91416098092905e-16	4.80076630233309e-16	NEB/KAT2B/KCNA5/AHNAK/TPM1/IDO1/CRYAB/KY/MYL9/TNNC1/ARHGEF25/CSRP1/SORBS2/TMOD1/TPM2/MYOM1/PGM5/SVIL/CFL2/FBXL22/RYR3/DMD/PDLIM3/CASQ2/FERMT2/ATP2B4/LMOD1/FLNA/ASB2/LDB3/PALLD/ACTA2/ANK2/NEXN/CALD1/MYH11/ACTC1/FBXO32/SYNM/JPH2/RYR2/ALDOA/AHNAK2/ANK1/PPP1R12B/SLC8A1/SYNC/TNNI2/FLNC/SYNPO2/DES/ABCC9	52
CC	GO:0030016	myofibril	49/999	240/19894	2.56728986377225e-17	6.67495364580785e-15	5.41833281775091e-15	NEB/KAT2B/KCNA5/AHNAK/TPM1/CRYAB/KY/MYL9/TNNC1/ARHGEF25/CSRP1/SORBS2/TMOD1/TPM2/MYOM1/PGM5/SVIL/CFL2/FBXL22/RYR3/DMD/PDLIM3/CASQ2/FERMT2/ATP2B4/LMOD1/FLNA/ASB2/LDB3/PALLD/ANK2/NEXN/CALD1/ACTC1/FBXO32/SYNM/JPH2/RYR2/ALDOA/AHNAK2/ANK1/PPP1R12B/SLC8A1/SYNC/TNNI2/FLNC/SYNPO2/DES/ABCC9	49
CC	GO:0030017	sarcomere	44/999	219/19894	2.05164917080235e-15	3.5561918960574e-13	2.886706377164e-13	NEB/KAT2B/KCNA5/TPM1/CRYAB/KY/MYL9/TNNC1/ARHGEF25/CSRP1/SORBS2/TMOD1/TPM2/MYOM1/PGM5/CFL2/FBXL22/RYR3/DMD/PDLIM3/CASQ2/FERMT2/ATP2B4/LMOD1/FLNA/ASB2/LDB3/PALLD/ANK2/NEXN/ACTC1/FBXO32/JPH2/RYR2/ALDOA/ANK1/PPP1R12B/SLC8A1/SYNC/TNNI2/FLNC/SYNPO2/DES/ABCC9	44
CC	GO:0031674	I band	35/999	145/19894	4.58156714541999e-15	5.95603728904599e-13	4.83475901398267e-13	NEB/KAT2B/KCNA5/CRYAB/KY/MYL9/CSRP1/SORBS2/PGM5/CFL2/FBXL22/RYR3/DMD/PDLIM3/CASQ2/FERMT2/ATP2B4/FLNA/ASB2/LDB3/PALLD/ANK2/NEXN/ACTC1/FBXO32/JPH2/RYR2/ALDOA/ANK1/PPP1R12B/SLC8A1/SYNC/FLNC/SYNPO2/DES	35
CC	GO:0062023	collagen-containing extracellular matrix	61/999	428/19894	1.57658146736352e-13	1.63964472605806e-11	1.33096667034268e-11	DPT/ANXA1/LAMC2/COMP/THBS2/VIT/FGL2/ADAMTS1/NCAM1/COL4A6/VCAN/MXRA5/THSD4/S100A9/ABI3BP/S100A8/NTN1/COL21A1/COL23A1/TGFB1I1/GPC2/LTBP4/APOA1/MMRN1/SMOC2/TNXB/ITIH5/COL8A1/ANGPTL1/MXRA7/SFRP1/ADAMTSL4/DCN/MFAP4/ACTA2/MST1/CSPG4/CDON/CXCL12/P3H2/SBSPON/SPARCL1/SRPX/SPON1/COL6A3/ASPN/SOD3/SSC5D/FBLN1/CPA3/ADAMTS15/ADAMTS8/MMP28/FCN1/FGF10/PRELP/F13A1/VTN/COL17A1/OGN/THBS4	61
CC	GO:0030018	Z disc	31/999	131/19894	2.9868451187543e-13	2.58859910292039e-11	2.10127174143943e-11	NEB/KCNA5/CRYAB/KY/MYL9/CSRP1/SORBS2/PGM5/CFL2/FBXL22/RYR3/DMD/PDLIM3/CASQ2/ATP2B4/FLNA/ASB2/LDB3/PALLD/ANK2/NEXN/FBXO32/JPH2/RYR2/ANK1/PPP1R12B/SLC8A1/SYNC/FLNC/SYNPO2/DES	31
CC	GO:0042383	sarcolemma	29/999	141/19894	6.94058570782595e-11	5.1558636686707e-09	4.18522536667399e-09	ANXA1/AHNAK/SGCA/SLC2A4/KCNB1/SLMAP/CACNB2/PGM5/ATP1A2/RYR3/DMD/AKAP6/ATP2B4/ANK2/BVES/SYNM/RYR2/POPDC2/AHNAK2/ANK1/CAV1/COL6A3/SLC8A1/SYNC/FLNC/SLC8A2/DES/DTNA/CACNG4	29
CC	GO:0032432	actin filament bundle	21/999	95/19894	7.48255434483573e-09	4.86366032414322e-07	3.94803196352517e-07	FAM107A/TPM1/CRYAB/MYL9/PGM5/PDLIM3/ABLIM1/DIXDC1/FERMT2/FLNA/SORBS1/ASB2/LDB3/PALLD/ACTA2/CALD1/MYLK/ABLIM3/LPP/PPP1R12B/SYNPO2	21
CC	GO:0042641	actomyosin	20/999	91/19894	1.88569091094503e-08	1.08951030410157e-06	8.84400064665445e-07	KAT2B/FAM107A/TPM1/MYL9/PGM5/PDLIM3/ABLIM1/DIXDC1/FERMT2/SORBS1/ASB2/LDB3/PALLD/ACTA2/CALD1/MYLK/ABLIM3/LPP/PPP1R12B/SYNPO2	20
CC	GO:0001725	stress fiber	19/999	85/19894	3.18194393432976e-08	1.5041916780468e-06	1.22101389250357e-06	FAM107A/TPM1/MYL9/PGM5/PDLIM3/ABLIM1/DIXDC1/FERMT2/SORBS1/ASB2/LDB3/PALLD/ACTA2/CALD1/MYLK/ABLIM3/LPP/PPP1R12B/SYNPO2	19
CC	GO:0097517	contractile actin filament bundle	19/999	85/19894	3.18194393432976e-08	1.5041916780468e-06	1.22101389250357e-06	FAM107A/TPM1/MYL9/PGM5/PDLIM3/ABLIM1/DIXDC1/FERMT2/SORBS1/ASB2/LDB3/PALLD/ACTA2/CALD1/MYLK/ABLIM3/LPP/PPP1R12B/SYNPO2	19
CC	GO:0097060	synaptic membrane	46/999	397/19894	1.16700135318042e-07	5.05700586378183e-06	4.10497844408201e-06	LRRC4/FXYD6/TIAM1/P2RY1/PRR7/CRYAB/PDE2A/DLG2/KCNB1/ITGA8/DMD/SLC16A7/ATP2B4/KCNC3/NRP2/LPAR1/PRRT1/PLPPR4/ANK2/KCNA3/GRIK5/MAGEE1/CHRM2/KCNA2/PTPRS/KCNMA1/LRFN5/CNKSR2/NRXN3/ANK1/CNTN1/CHRNB4/NLGN1/RIMS3/UNC13A/GRIN2A/DGKI/GLRB/HTR1B/GABRP/IGSF9B/RIMS1/CACNG4/CNR1/TENM2/CHRNA3	46
CC	GO:0045211	postsynaptic membrane	36/999	276/19894	1.55840757314695e-07	6.23363029258779e-06	5.06009260592653e-06	LRRC4/FXYD6/TIAM1/P2RY1/PRR7/DLG2/KCNB1/ITGA8/DMD/SLC16A7/KCNC3/NRP2/LPAR1/PRRT1/PLPPR4/ANK2/KCNA3/GRIK5/MAGEE1/CHRM2/KCNA2/PTPRS/KCNMA1/LRFN5/CNKSR2/ANK1/CNTN1/CHRNB4/NLGN1/GRIN2A/GLRB/GABRP/IGSF9B/CACNG4/TENM2/CHRNA3	36
CC	GO:0043034	costamere	8/999	18/19894	1.09632000043483e-06	4.07204571590081e-05	3.30544601634863e-05	AHNAK/PGM5/SVIL/DMD/ANK2/SYNM/AHNAK2/FLNC	8
CC	GO:0030055	cell-substrate junction	46/999	431/19894	1.23251685953245e-06	4.27272511304582e-05	3.4683456889299e-05	FAP/GSN/ANXA1/EHD3/ZNF185/AHNAK/EFS/RHOB/FAM107A/FLRT1/FHL1/LIMS2/PDGFRB/CSRP1/MME/SORBS2/TGFB1I1/ITGA8/PGM5/SVIL/TNS2/DMD/DIXDC1/FERMT2/FLNA/SORBS1/GRB7/PALLD/CSPG4/NEXN/ACTC1/TNS1/ITGB7/IL16/LPP/NFASC/CNN1/CAV1/CORO2B/AKAP12/LAYN/FLNC/SYNPO2/ITGBL1/TNS4/COL17A1	46
CC	GO:0044291	cell-cell contact zone	15/999	73/19894	2.75773565728397e-06	8.96264088617292e-05	7.27534209586101e-05	KCNA5/AHNAK/TIAM1/JAM2/PGM5/ATP1A2/CTNNA3/AKAP6/ANK2/JAM3/GJC1/PCDH9/SLC8A1/SCN4B/DES	15
CC	GO:0005925	focal adhesion	44/999	421/19894	3.63433307418171e-06	0.000111167835210264	9.02394775694655e-05	FAP/GSN/ANXA1/EHD3/ZNF185/AHNAK/EFS/RHOB/FAM107A/FLRT1/FHL1/LIMS2/PDGFRB/CSRP1/MME/SORBS2/TGFB1I1/ITGA8/PGM5/SVIL/TNS2/DIXDC1/FERMT2/FLNA/SORBS1/GRB7/PALLD/CSPG4/NEXN/ACTC1/TNS1/ITGB7/IL16/LPP/NFASC/CNN1/CAV1/CORO2B/AKAP12/LAYN/FLNC/SYNPO2/ITGBL1/TNS4	44
CC	GO:0034703	cation channel complex	27/999	204/19894	4.10096075507858e-06	0.000118472199591159	9.61687288179246e-05	KCNA5/HSPA2/SCNN1B/DLG2/KCNB1/CACNB2/CACNA2D3/KCNJ14/SCN7A/RYR3/KCNMB1/CASQ2/AKAP6/KCNC3/CACNA1H/KCNA3/GRIK5/TRPC4/RYR2/CNGA1/TRPC1/KCNA2/KCNMA1/KCNQ4/SCN4B/ABCC9/CACNG4	27
CC	GO:0005788	endoplasmic reticulum lumen	35/999	313/19894	8.2807112824918e-06	0.000226629992994512	0.000183964832370039	MTTP/EVA1A/ADAMTSL1/APOB/GHRL/COL4A6/MSLN/VCAN/CES2/COL21A1/COL23A1/FKBP10/IL23A/APOA1/COL8A1/CASQ2/ADAMTSL4/NOTUM/P3H2/BCHE/LIPC/CHRDL1/SPARCL1/ARSL/SPON1/COL6A3/CP/PROC/C4A/F10/VTN/IL6/SCG2/COL17A1/CHGB	35
CC	GO:0032279	asymmetric synapse	36/999	329/19894	1.00424519999005e-05	0.000261103751997413	0.000211948592208426	LRRC4/AURKA/TIAM1/P2RY1/PRR7/PRKN/C1QL1/PSD/INSYN1/DLG2/CAP2/ITGA8/SRCIN1/SLC16A7/NCS1/MAGI2/PRRT1/ANKS1B/PLPPR4/ITPR1/GRIK5/MAP1B/CHRM2/PTPRS/LRFN5/CNKSR2/SLC8A1/NLGN1/MPDZ/ZDHHC15/GRIN2A/DGKI/SLC8A2/IGSF9B/CACNG4/CHRNA3	36
CC	GO:0005901	caveola	15/999	82/19894	1.23841796415493e-05	0.000306655876838365	0.000248925114599563	KCNA5/CD36/ATP1A2/AKAP6/ATP2B4/SORBS1/BVES/LRRK2/TRPC4/CAVIN2/ADTRP/CAVIN1/KCNMA1/CAV1/PTGIS	15
CC	GO:0044853	plasma membrane raft	18/999	113/19894	1.30193518582532e-05	0.000307730134831439	0.00024979713373969	MAL/KCNA5/CD36/ATP1A2/AKAP6/ATP2B4/SORBS1/BVES/LRRK2/TRPC4/CAVIN2/CD177/ADTRP/CAVIN1/KCNMA1/CAV1/PTGIS/CHRNA3	18
CC	GO:0014069	postsynaptic density	34/999	313/19894	2.04621932225256e-05	0.000462623498944056	0.000375530411086167	LRRC4/AURKA/TIAM1/P2RY1/PRR7/PRKN/PSD/INSYN1/DLG2/CAP2/ITGA8/SRCIN1/SLC16A7/NCS1/MAGI2/PRRT1/ANKS1B/PLPPR4/ITPR1/GRIK5/MAP1B/PTPRS/LRFN5/CNKSR2/SLC8A1/NLGN1/MPDZ/ZDHHC15/GRIN2A/DGKI/SLC8A2/IGSF9B/CACNG4/CHRNA3	34
CC	GO:0099572	postsynaptic specialization	36/999	341/19894	2.19934104537254e-05	0.00047652389316405	0.000386813929471223	LRRC4/AURKA/TIAM1/P2RY1/PRR7/PRKN/PSD/INSYN1/DLG2/KCNB1/CAP2/ITGA8/SRCIN1/SLC16A7/NCS1/MAGI2/PRRT1/ANKS1B/PLPPR4/ITPR1/GRIK5/MAP1B/PTPRS/LRFN5/CNKSR2/SLC8A1/NLGN1/MPDZ/ZDHHC15/GRIN2A/DGKI/SLC8A2/GLRB/IGSF9B/CACNG4/CHRNA3	36
CC	GO:0098984	neuron to neuron synapse	37/999	360/19894	3.05699578431725e-05	0.000635855123137989	0.000516149604004724	LRRC4/AURKA/TIAM1/P2RY1/PRR7/PRKN/C1QL1/PSD/ATP1B2/INSYN1/DLG2/CAP2/ITGA8/SRCIN1/SLC16A7/NCS1/MAGI2/PRRT1/ANKS1B/PLPPR4/ITPR1/GRIK5/MAP1B/CHRM2/PTPRS/LRFN5/CNKSR2/SLC8A1/NLGN1/MPDZ/ZDHHC15/GRIN2A/DGKI/SLC8A2/IGSF9B/CACNG4/CHRNA3	37
CC	GO:0043025	neuronal cell body	46/999	488/19894	3.20494521047379e-05	0.000640989042094759	0.000520317015951414	TPX2/AURKA/S100B/TIAM1/TMEM100/APOB/FLRT1/CRYAB/GHR/DLG2/MME/NEGR1/KCNB1/SORBS2/CPLX1/KCNJ14/ITGA8/ATP1A2/PRKAR2B/NDN/KCNN3/FLNA/GFRA1/KCNC3/LPAR1/MAOB/LRRK2/MAPT/PDE1C/ROR2/MAP1B/STMN2/CHRM2/KCNA2/PTPRS/CNKSR2/SNCG/RIC3/SLC8A1/AKAP12/PPP1R1B/RAC3/SLC8A2/C4A/TTLL7/CHRNA3	46
CC	GO:0000940	outer kinetochore	7/999	20/19894	3.43360757533594e-05	0.000661287384879514	0.000536794010803006	NDC80/NUF2/SKA3/SKA1/ZWINT/CCNB1/SPC24	7
CC	GO:0045121	membrane raft	31/999	286/19894	4.86805891252969e-05	0.000904068083755515	0.000733869031550529	GPM6B/MAL/KCNA5/AHNAK/CD36/RGMB/MME/SGCA/SLC2A4/CLIP3/ATP1A2/DMD/AKAP6/ATP2B4/SORBS1/KCNA3/BVES/LRRK2/TRPC4/MAPT/CAVIN2/CD177/ADTRP/CAVIN1/KCNMA1/CAV1/ARID3A/ADCY2/CNR1/PTGIS/CHRNA3	31
CC	GO:0098857	membrane microdomain	31/999	287/19894	5.20172389903007e-05	0.000932722906032977	0.00075712932250855	GPM6B/MAL/KCNA5/AHNAK/CD36/RGMB/MME/SGCA/SLC2A4/CLIP3/ATP1A2/DMD/AKAP6/ATP2B4/SORBS1/KCNA3/BVES/LRRK2/TRPC4/MAPT/CAVIN2/CD177/ADTRP/CAVIN1/KCNMA1/CAV1/ARID3A/ADCY2/CNR1/PTGIS/CHRNA3	31
CC	GO:0034702	monoatomic ion channel complex	35/999	344/19894	6.09964760701175e-05	0.00105727225188204	0.000858231119442707	KCNA5/HSPA2/SCNN1B/DLG2/KCNB1/CACNB2/CACNA2D3/KCNJ14/KCNJ15/SCN7A/RYR3/KCNMB1/CASQ2/AKAP6/KCNC3/CACNA1H/KCNA3/GRIK5/TRPC4/RYR2/CNGA1/TRPC1/KCNA2/KCNMA1/CHRNB4/KCNQ4/KCNE4/GRIN2A/SCN4B/GLRB/GABRP/ABCC9/KCNH3/CACNG4/CHRNA3	35
CC	GO:0016529	sarcoplasmic reticulum	13/999	76/19894	9.59666786993955e-05	0.00159390422710052	0.00129383723697835	DMPK/SLC2A4/PLN/RYR3/CASQ2/AKAP6/ITPR1/JPH2/RYR2/P3H2/IRAG1/ANK1/THBS4	13
CC	GO:0098978	glutamatergic synapse	39/999	409/19894	9.80864139754163e-05	0.00159390422710052	0.00129383723697835	LRRC4/AURKA/FXYD6/TIAM1/P2RY1/PRR7/GHRL/C1QL1/CPLX1/ITGA8/EPHA7/SRCIN1/PRKAR2B/CDH11/SLC16A7/ATP2B4/FLNA/NRP2/LPAR1/NPTX1/PLPPR4/KCNA3/LRRK2/FILIP1/ACTC1/ROR2/CHRM2/ABLIM3/KCNA2/SPARCL1/ADGRL3/PTPRS/LRFN5/CNKSR2/NLGN1/GRIN2A/RAC3/CACNG4/CNR1	39
CC	GO:0045177	apical part of cell	43/999	468/19894	0.000102933745122775	0.00162198628678312	0.00131663259311747	FAP/NAALADL1/ANXA1/SLC23A1/ACY3/MAL/KCNA5/SCNN1B/ADRB2/SLC5A6/P2RY1/CD36/F2RL2/ECRG4/CYBRD1/ATP1B2/SLC15A1/PDGFRB/SLC7A9/PTH1R/DUOX1/KCNB1/SORBS2/ITGA8/CLDN1/FABP1/SLC9A4/SLC6A14/ANK2/FRMD6/CSPG4/CHL1/KIAA1614/KCNMA1/GPIHBP1/SLC26A3/MPDZ/KL/KCNE4/PDZK1/ADGRG2/EDAR/DPEP1	43
CC	GO:0098636	protein complex involved in cell adhesion	11/999	57/19894	0.000106672384568935	0.00163145999928959	0.0013243227929456	JAM2/MMRN1/ITGA8/TNXB/JAM3/ITGB7/ITGA7/NLGN1/ITGA9/ITGBL1/VTN	11
CC	GO:0031252	cell leading edge	40/999	426/19894	0.000111928703490315	0.0016629407375704	0.00134987699547718	FAP/GSN/S100B/FAM107A/TIAM1/TPM1/KNSTRN/PSD/EPB41L3/PTPN13/STON1/DUOX1/KCNB1/ARHGEF26/SORBS2/ITGA8/CTNNA3/ABLIM1/FERMT2/NME1/KCNC3/MCC/APBB1/ARHGEF4/PALLD/ACTA2/CSPG4/ACTC1/MAPT/CD177/MYLK/STMN2/ABLIM3/KCNA2/ADGRE2/ANK1/LAYN/RASGRP2/ACTG2/RAC3	40
CC	GO:0016324	apical plasma membrane	38/999	402/19894	0.000143451566690667	0.00207207818553186	0.00168199059189934	NAALADL1/ANXA1/SLC23A1/ACY3/MAL/KCNA5/SCNN1B/ADRB2/SLC5A6/P2RY1/CD36/F2RL2/ECRG4/CYBRD1/ATP1B2/SLC15A1/PDGFRB/SLC7A9/PTH1R/DUOX1/KCNB1/SORBS2/CLDN1/SLC9A4/SLC6A14/ANK2/FRMD6/CSPG4/KIAA1614/KCNMA1/GPIHBP1/SLC26A3/MPDZ/KL/KCNE4/PDZK1/ADGRG2/DPEP1	38
CC	GO:0009897	external side of plasma membrane	38/999	405/19894	0.000166987460801524	0.00234685080045385	0.00190503475907286	CXCL9/MUC16/GFRA2/FCGR3A/SCNN1B/CXCL10/CCR8/NCAM1/CD36/SCUBE1/ATP1B2/GHR/TGFBR3/SLC2A4/ITGA8/GFRA1/KIT/CD207/CXCL12/LIFR/SLAMF7/FCER1A/ITGA7/LY9/CD84/IL2RA/ASGR1/GPIHBP1/CLEC10A/FOLR2/MS4A2/FCRL5/ITGA9/HHLA2/FCN1/F10/ULBP2/FCRL2	38
CC	GO:0001533	cornified envelope	11/999	60/19894	0.000172667238693623	0.00236281484528115	0.00191799342703996	PPL/ANXA1/CSTA/TGM1/SCEL/DSC3/PKP1/DSG3/SERPINB2/KRT16/KLK7	11
CC	GO:0014704	intercalated disc	10/999	51/19894	0.000190043463345411	0.00243575995351059	0.00197720595416548	KCNA5/PGM5/ATP1A2/CTNNA3/AKAP6/ANK2/GJC1/SLC8A1/SCN4B/DES	10
CC	GO:0030315	T-tubule	10/999	51/19894	0.000190043463345411	0.00243575995351059	0.00197720595416548	AHNAK/SLC2A4/CACNB2/ATP1A2/AKAP6/ATP2B4/ANK2/AHNAK2/SLC8A1/CACNG4	10
CC	GO:0005604	basement membrane	14/999	92/19894	0.000192050304026797	0.00243575995351059	0.00197720595416548	LAMC2/THBS2/ADAMTS1/COL4A6/NTN1/COL23A1/SMOC2/COL8A1/ACTA2/P3H2/FBLN1/VTN/COL17A1/THBS4	14
CC	GO:0036379	myofilament	7/999	26/19894	0.000223602082299057	0.00276840673322641	0.00224722894741658	TPM1/TNNC1/TMOD1/TPM2/MYOM1/LMOD1/TNNI2	7
CC	GO:0031253	cell projection membrane	34/999	354/19894	0.000233973766279318	0.00282945019686617	0.00229678042296221	FAP/EHD3/MTTP/FAM107A/TIAM1/SLC5A6/TPM1/CD36/PSD/CYBRD1/ATP1B2/EPB41L3/SLC7A9/KCNB1/ITGA8/DMD/FERMT2/NME1/KCNC3/ARHGEF4/BVES/CSPG4/MAPT/CNGA1/KCNA2/ADGRE2/ANK1/PRKCB/SLC26A3/CYS1/RASGRP2/PDZK1/HHIP/DPEP1	34
CC	GO:0005796	Golgi lumen	15/999	106/19894	0.000262078620106318	0.00309729278307466	0.00251419920245534	MUC16/VCAN/GPC2/MUC12/DCN/CSPG4/PROC/SOD3/PODXL2/PRELP/F10/VTN/OGN/MUC6/MUC5AC	15
CC	GO:0016528	sarcoplasm	14/999	95/19894	0.000271010138840382	0.00313167271548886	0.00254210679941505	GSN/DMPK/SLC2A4/PLN/RYR3/CASQ2/AKAP6/ITPR1/JPH2/RYR2/P3H2/IRAG1/ANK1/THBS4	14
CC	GO:0000779	condensed chromosome, centromeric region	21/999	181/19894	0.000307803287844228	0.00347951542780432	0.00282446495252942	NDC80/NUF2/KAT2B/SGO1/HJURP/NEK2/SKA3/MAD2L1/TTK/AURKA/SKA1/CENPA/KNSTRN/ZWINT/CCNB1/AURKB/CDT1/CDC20/SPC24/CENPW/DYNC1I1	21
CC	GO:0099634	postsynaptic specialization membrane	16/999	120/19894	0.000331727819797166	0.00367018013392609	0.00297923529089952	LRRC4/TIAM1/PRR7/DLG2/KCNB1/ITGA8/SLC16A7/PRRT1/PLPPR4/GRIK5/PTPRS/LRFN5/CNKSR2/NLGN1/GRIN2A/CACNG4	16
CC	GO:0000776	kinetochore	20/999	170/19894	0.000353032404057547	0.00382451771062342	0.00310451741287448	NDC80/NUF2/KAT2B/SGO1/HJURP/NEK2/SKA3/MAD2L1/TTK/AURKA/SKA1/KNSTRN/ZWINT/CCNB1/AURKB/CDT1/CDC20/SPC24/CENPW/DYNC1I1	20
CC	GO:0098839	postsynaptic density membrane	14/999	99/19894	0.000418445037822417	0.00444064121770728	0.0036046500572887	LRRC4/TIAM1/PRR7/DLG2/ITGA8/SLC16A7/PRRT1/PLPPR4/GRIK5/PTPRS/LRFN5/CNKSR2/GRIN2A/CACNG4	14
CC	GO:1902495	transmembrane transporter complex	39/999	444/19894	0.000520739525227378	0.00541569106236473	0.00439613788665639	KCNA5/HSPA2/SCNN1B/S100A9/ATP1B2/DLG2/KCNB1/CACNB2/CACNA2D3/PLN/KCNJ14/KCNJ15/SCN7A/ATP1A2/RYR3/KCNMB1/CASQ2/AKAP6/KCNC3/CACNA1H/KCNA3/GRIK5/TRPC4/RYR2/CNGA1/TRPC1/KCNA2/KCNMA1/CHRNB4/KCNQ4/KCNE4/GRIN2A/SCN4B/GLRB/GABRP/ABCC9/KCNH3/CACNG4/CHRNA3	39
CC	GO:0005865	striated muscle thin filament	6/999	22/19894	0.000588696370008759	0.00600239436087362	0.00487238894475773	TPM1/TNNC1/TMOD1/TPM2/LMOD1/TNNI2	6
CC	GO:0042734	presynaptic membrane	19/999	167/19894	0.000743155570593276	0.00743155570593276	0.00603249764793327	FXYD6/P2RY1/PDE2A/ATP2B4/KCNC3/LPAR1/KCNA3/GRIK5/CHRM2/KCNA2/PTPRS/NRXN3/CNTN1/RIMS3/UNC13A/GRIN2A/HTR1B/RIMS1/CNR1	19
CC	GO:0150034	distal axon	26/999	272/19894	0.00129689985705666	0.0127243004843295	0.0103288350085347	TIAM1/CPLX1/FLNA/KCNC3/APBB1/PALLD/KCNA3/LRRK2/MAPT/MAP1B/STMN2/CHRM2/KCNA2/PTPRS/SNCG/PCDH9/PRKCB/SLC8A1/TSHZ3/UNC13A/RAC3/SLC8A2/HTR1B/BOC/CNR1/TENM2	26
CC	GO:1990351	transporter complex	39/999	471/19894	0.00157430670124456	0.0150239818199281	0.0121955803841927	KCNA5/HSPA2/SCNN1B/S100A9/ATP1B2/DLG2/KCNB1/CACNB2/CACNA2D3/PLN/KCNJ14/KCNJ15/SCN7A/ATP1A2/RYR3/KCNMB1/CASQ2/AKAP6/KCNC3/CACNA1H/KCNA3/GRIK5/TRPC4/RYR2/CNGA1/TRPC1/KCNA2/KCNMA1/CHRNB4/KCNQ4/KCNE4/GRIN2A/SCN4B/GLRB/GABRP/ABCC9/KCNH3/CACNG4/CHRNA3	39
CC	GO:0045178	basal part of cell	28/999	305/19894	0.00158907500018471	0.0150239818199281	0.0121955803841927	FAP/ANXA1/SLC23A1/AURKA/MTTP/SLC51B/SLC5A6/P2RY1/AQP3/NKD2/DLG2/PTH1R/GKN2/SLC16A7/ATP2B4/CLDN1/SLC9A4/ANK2/TRPC4/PIANP/ABCA8/ANK1/GPIHBP1/AQP9/KCNQ4/ITGA9/SLC8A2/SLC39A5	28
CC	GO:0030057	desmosome	6/999	27/19894	0.00188398458277327	0.0174941425543232	0.0142007108588737	PPL/DSC3/PKP1/CTNNA3/DSG3/JAM3	6
CC	GO:0044306	neuron projection terminus	15/999	128/19894	0.00192118461966264	0.0175265965302557	0.0142270550782035	FLRT1/MME/CPLX1/DMD/KCNC3/KCNA3/LRRK2/CHRM2/KCNA2/SNCG/PRKCB/SLC8A1/UNC13A/SLC8A2/HTR1B	15
CC	GO:0044305	calyx of Held	5/999	19/19894	0.00203738726181023	0.0182662306231262	0.0148274463155336	CPLX1/KCNA3/KCNA2/PRKCB/HTR1B	5
CC	GO:0043197	dendritic spine	18/999	171/19894	0.00243660621619393	0.0214751734308618	0.0174322764084526	LRRC4/TIAM1/CRYAB/PSD/ITGA8/ATP1A2/PRKAR2B/KCNC3/LPAR1/ANKS1B/MAPT/PALMD/MAP1B/NLGN1/GRIN2A/DGKI/SLC8A2/TENM2	18
CC	GO:0034704	calcium channel complex	10/999	70/19894	0.00249659450861786	0.0216371524080215	0.0175637613676449	HSPA2/CACNB2/CACNA2D3/RYR3/CASQ2/AKAP6/CACNA1H/TRPC4/RYR2/CACNG4	10
CC	GO:0009925	basal plasma membrane	26/999	286/19894	0.00261885314232407	0.0223246497378445	0.0181218310625013	ANXA1/SLC23A1/AURKA/MTTP/SLC51B/SLC5A6/P2RY1/AQP3/NKD2/DLG2/PTH1R/SLC16A7/ATP2B4/CLDN1/SLC9A4/ANK2/TRPC4/PIANP/ABCA8/ANK1/GPIHBP1/AQP9/KCNQ4/ITGA9/SLC8A2/SLC39A5	26
CC	GO:0044309	neuron spine	18/999	173/19894	0.00276653790984172	0.0232032211793176	0.018835003426936	LRRC4/TIAM1/CRYAB/PSD/ITGA8/ATP1A2/PRKAR2B/KCNC3/LPAR1/ANKS1B/MAPT/PALMD/MAP1B/NLGN1/GRIN2A/DGKI/SLC8A2/TENM2	18
CC	GO:0031672	A band	7/999	39/19894	0.00295986679501184	0.0244306465620025	0.01983135480033	KAT2B/CRYAB/MYOM1/ANK2/ALDOA/ANK1/PPP1R12B	7
CC	GO:0030027	lamellipodium	20/999	203/19894	0.00315610656344979	0.0256433658280296	0.0208157686174896	FAP/GSN/PTPN13/SORBS2/CTNNA3/ABLIM1/FERMT2/MCC/APBB1/PALLD/ACTA2/CSPG4/ACTC1/CD177/MYLK/STMN2/ABLIM3/KCNA2/ACTG2/RAC3	20
CC	GO:0005581	collagen trimer	11/999	86/19894	0.00377140704573662	0.030171256365893	0.0244912425156338	COL4A6/C1QL1/C1QTNF2/COL21A1/COL23A1/C1QTNF7/COL8A1/COL6A3/SCARA3/FCN1/COL17A1	11
CC	GO:0031256	leading edge membrane	18/999	179/19894	0.00398727417893706	0.0314148874704132	0.0255007487361047	FAP/FAM107A/TIAM1/TPM1/PSD/EPB41L3/KCNB1/ITGA8/FERMT2/NME1/KCNC3/ARHGEF4/CSPG4/MAPT/KCNA2/ADGRE2/ANK1/RASGRP2	18
CC	GO:0000793	condensed chromosome	25/999	281/19894	0.00414352820593133	0.0321587263743924	0.0261045531905493	NDC80/NUF2/KAT2B/SGO1/HJURP/NEK2/SKA3/MAD2L1/TTK/AURKA/SKA1/HSPA2/CENPA/KNSTRN/ZWINT/CCNB1/RCC1/AURKB/CDT1/P3H4/CDC20/SPC24/CENPW/DYNC1I1/TUBA1A	25
CC	GO:0034705	potassium channel complex	12/999	100/19894	0.00431747836521085	0.033016011028083	0.0268004461989095	KCNA5/DLG2/KCNB1/KCNJ14/KCNMB1/KCNC3/KCNA3/GRIK5/KCNA2/KCNMA1/KCNQ4/ABCC9	12
CC	GO:0016323	basolateral plasma membrane	23/999	255/19894	0.00492313703103386	0.0371019022628639	0.0301171311890859	ANXA1/AURKA/MTTP/SLC51B/SLC5A6/P2RY1/AQP3/NKD2/DLG2/PTH1R/SLC16A7/ATP2B4/CLDN1/SLC9A4/ANK2/TRPC4/PIANP/ABCA8/ANK1/GPIHBP1/AQP9/SLC8A2/SLC39A5	23
CC	GO:0000775	chromosome, centromeric region	23/999	257/19894	0.00540695036241727	0.0401659169779569	0.0326043172229974	NDC80/NUF2/KAT2B/SGO1/HJURP/NEK2/SKA3/MAD2L1/TTK/AURKA/SKA1/CENPA/KNSTRN/ZWINT/CCNB1/AURKB/CDT1/OIP5/CDC20/SPC24/CENPW/DYNC1I1/H2BC11	23
CC	GO:0033017	sarcoplasmic reticulum membrane	7/999	44/19894	0.00593547455048986	0.0434710812148553	0.0352872541845283	DMPK/PLN/RYR3/CASQ2/AKAP6/JPH2/RYR2	7
CC	GO:0044304	main axon	9/999	68/19894	0.00673220533291112	0.0483077234224351	0.0392133544380495	TIAM1/EPB41L3/DLG2/MAPT/MAP1B/KCNA2/NFASC/ANK1/IQCJ-SCHIP1	9
CC	GO:0005884	actin filament	13/999	119/19894	0.00678166117276492	0.0483077234224351	0.0392133544380495	ANXA1/TPM1/SMTN/TMOD1/TPM2/PDLIM3/LMOD1/FLNA/LDB3/PALLD/ACTC1/JAM3/RAC3	13
MF	GO:0005539	glycosaminoglycan binding	42/964	239/18522	3.26009293930045e-12	2.95038411006691e-09	2.66298117989174e-09	CEMIP/LYVE1/LAMC2/HMMR/COMP/THBS2/VIT/PTN/CCN5/ADAMTS1/CXCL10/APOB/FGFR4/VCAN/CXCL6/TGFBR3/COL23A1/LTBP4/SMOC2/TNXB/SFRP1/RSPO2/NRP2/DCN/FGF2/FGFBP1/LIPC/ADGRE2/PTPRS/LAYN/SOD3/PODXL2/SLIT2/ADAMTS15/ADAMTS8/FGF10/PRELP/VTN/LGR6/GREM2/COL17A1/THBS4	42
MF	GO:0008201	heparin binding	32/964	174/18522	3.77927834967804e-10	1.36817365953658e-07	1.23489707449885e-07	LAMC2/COMP/THBS2/PTN/CCN5/ADAMTS1/CXCL10/APOB/FGFR4/CXCL6/TGFBR3/COL23A1/SMOC2/TNXB/SFRP1/RSPO2/NRP2/FGF2/FGFBP1/LIPC/PTPRS/SOD3/SLIT2/ADAMTS15/ADAMTS8/FGF10/PRELP/VTN/LGR6/GREM2/COL17A1/THBS4	32
MF	GO:1901681	sulfur compound binding	41/964	267/18522	4.53538229680635e-10	1.36817365953658e-07	1.23489707449885e-07	SULT1A1/LAMC2/COMP/THBS2/ACBD7/PTN/CCN5/ADAMTS1/CXCL10/APOB/ACACB/FGFR4/CXCL6/RCC1/TGFBR3/COL23A1/SMOC2/TNXB/SFRP1/RSPO2/NRP2/FGF2/RYR2/FGFBP1/LIPC/ADGRE2/PTPRS/CHST15/PNPLA3/SOD3/SLIT2/ADAMTS15/ADAMTS8/FGF10/PRELP/VTN/LGR6/GREM2/COL17A1/THBS4/OGDHL	41
MF	GO:0005201	extracellular matrix structural constituent	30/964	166/18522	2.0579649106119e-09	4.65614561025943e-07	4.20258097535483e-07	DPT/LAMC2/COMP/THBS2/FGL2/COL4A6/VCAN/MXRA5/THSD4/ABI3BP/COL21A1/COL23A1/LTBP4/MMRN1/TNXB/COL8A1/DCN/MFAP4/SBSPON/SRPX/SPON1/COL6A3/ASPN/FBLN1/PRELP/VTN/COL17A1/OGN/MUC6/MUC5AC	30
MF	GO:0003779	actin binding	49/964	434/18522	2.88595845777575e-07	5.2235848085741e-05	4.71474476470311e-05	NEB/GSN/FAM107A/TPM1/PRKN/SMTN/EPB41L3/TNNC1/CAP2/TMOD1/CACNB2/DAAM2/CORO6/TPM2/PKNOX2/SVIL/CFL2/CTNNA3/DMD/PDLIM3/MYRIP/ABLIM1/DIXDC1/FERMT2/NCALD/LMOD1/FLNA/SORBS1/TAGLN/LDB3/PALLD/DNASE1/LRRK2/NEXN/CALD1/MYH11/TNS1/MAPT/MAP1B/ALDOA/MYLK/ABLIM3/KCNMA1/CNN1/CORO2B/TNNI2/FLNC/SYNPO2/TNS4	49
MF	GO:0008307	structural constituent of muscle	12/964	42/18522	9.56818035442804e-07	0.00014432005367929	0.00013026154307081	NEB/TPM1/SMTN/MYL9/CSRP1/SORBS2/TPM2/MYOM1/DMD/NEXN/MYH11/SYNM	12
MF	GO:0005178	integrin binding	23/964	157/18522	6.73108851730653e-06	0.000870233586880344	0.000785462359312762	FAP/COMP/PTN/CCN5/JAM2/LTBP4/ITGA8/TNXB/FERMT2/GFRA1/FGF2/JAM3/CXCL12/ITGB7/CD177/ITGA7/FBLN1/ITGA9/MADCAM1/ADAMTS8/ITGBL1/VTN/THBS4	23
MF	GO:0005261	monoatomic cation channel activity	37/964	330/18522	9.53498525764667e-06	0.00102709361343722	0.00092704233094188	KCNA5/ATP5PF/SCNN1B/KCNB1/CACNB2/CACNA2D3/KCNJ14/KCNJ15/SCN7A/RYR3/KCNMB1/KCNN3/KCNC3/NCS1/CACNA1H/ITPR1/KCNA3/GRIK5/TRPC4/RYR2/CALHM5/CNGA1/TRPC1/KCNA2/KCNMA1/CHRNB4/KCNQ4/KCNE4/GRIN2A/SCN4B/HTR1B/KCNK3/KCNK9/ABCC9/KCNH3/CACNG4/CHRNA3	37
MF	GO:0046873	metal ion transmembrane transporter activity	45/964	437/18522	1.02141906308674e-05	0.00102709361343722	0.00092704233094188	SLC23A1/KCNA5/SCNN1B/SLC5A6/SLC9A9/NIPAL4/KCNB1/CACNB2/CACNA2D3/KCNJ14/KCNJ15/SCN7A/SLC5A9/ATP1A2/RYR3/KCNMB1/KCNN3/ATP2B4/KCNC3/NCS1/SLC9A4/SLC6A14/CACNA1H/ITPR1/KCNA3/GRIK5/CLDN16/TRPC4/RYR2/TRPC1/KCNA2/KCNMA1/SLC8A1/KCNQ4/KCNE4/GRIN2A/SCN4B/SLC8A2/HTR1B/KCNK3/KCNK9/ABCC9/KCNH3/CACNG4/SLC39A5	45
MF	GO:0008179	adenylate cyclase binding	6/964	12/18522	1.37933225894391e-05	0.00124829569434424	0.00112669666625313	ADRB2/CAP2/AKAP6/ADCY5/AKAP12/ADCY2	6
MF	GO:0022843	voltage-gated monoatomic cation channel activity	21/964	143/18522	1.60956094663253e-05	0.00132422968791131	0.00119523377472425	KCNA5/KCNB1/CACNB2/CACNA2D3/KCNJ14/KCNJ15/KCNN3/KCNC3/NCS1/CACNA1H/KCNA3/KCNA2/KCNMA1/KCNQ4/KCNE4/HTR1B/KCNK3/KCNK9/ABCC9/KCNH3/CACNG4	21
MF	GO:0022836	gated channel activity	34/964	301/18522	1.85492172977726e-05	0.00139892013787368	0.00126264847570803	KCNA5/SCNN1B/KCNB1/CACNB2/CACNA2D3/KCNJ14/CLCN4/KCNJ15/RYR3/KCNMB1/KCNN3/KCNC3/NCS1/CACNA1H/ITPR1/KCNA3/GRIK5/RYR2/CNGA1/KCNA2/KCNMA1/CHRNB4/KCNQ4/KCNE4/GRIN2A/GLRB/HTR1B/KCNK3/GABRP/KCNK9/ABCC9/KCNH3/CACNG4/CHRNA3	34
MF	GO:0005244	voltage-gated monoatomic ion channel activity	23/964	172/18522	3.05174347047822e-05	0.0021244829544483	0.00191753273934502	KCNA5/KCNB1/CACNB2/CACNA2D3/KCNJ14/CLCN4/KCNJ15/KCNN3/KCNC3/NCS1/CACNA1H/KCNA3/KCNA2/KCNMA1/KCNQ4/KCNE4/GRIN2A/HTR1B/KCNK3/KCNK9/ABCC9/KCNH3/CACNG4	23
MF	GO:0022832	voltage-gated channel activity	23/964	173/18522	3.34996214172303e-05	0.00216551124161382	0.00195456437742637	KCNA5/KCNB1/CACNB2/CACNA2D3/KCNJ14/CLCN4/KCNJ15/KCNN3/KCNC3/NCS1/CACNA1H/KCNA3/KCNA2/KCNMA1/KCNQ4/KCNE4/GRIN2A/HTR1B/KCNK3/KCNK9/ABCC9/KCNH3/CACNG4	23
MF	GO:0015631	tubulin binding	39/964	383/18522	5.01681454299864e-05	0.0028863893401913	0.00260522027099558	NDC80/NUF2/SKA3/KIF20A/SKA1/PRC1/TIAM1/KNSTRN/CCDC69/PRKN/KIFC1/CRYAB/S100A9/S100A8/STMN1/CLIP3/JAKMIP2/SPC24/MAP6/CLIP4/PSRC1/EML1/NDN/DIXDC1/NCALD/REEP2/MID2/LRRK2/DYNC1I1/REEP1/MAPT/STARD9/MAP1B/ALDOA/STMN2/DCLK2/CCDC187/EML5/TTLL7	39
MF	GO:0008017	microtubule binding	31/964	277/18522	5.10300877823876e-05	0.0028863893401913	0.00260522027099558	NDC80/NUF2/SKA3/KIF20A/SKA1/PRC1/TIAM1/KNSTRN/CCDC69/KIFC1/CRYAB/S100A9/S100A8/CLIP3/JAKMIP2/SPC24/MAP6/CLIP4/PSRC1/EML1/REEP2/MID2/LRRK2/DYNC1I1/REEP1/MAPT/STARD9/MAP1B/DCLK2/CCDC187/EML5	31
MF	GO:0005216	monoatomic ion channel activity	42/964	441/18522	0.000120171273366749	0.00639735308217108	0.00577417387817942	KCNA5/ATP5PF/SCNN1B/KCNB1/CACNB2/CACNA2D3/KCNJ14/CLCN4/KCNJ15/SCN7A/RYR3/KCNMB1/KCNN3/KCNC3/NCS1/CACNA1H/ITPR1/KCNA3/GRIK5/TRPC4/RYR2/CALHM5/CNGA1/TRPC1/KCNA2/GJC1/KCNMA1/CHRNB4/ANO5/KCNQ4/KCNE4/GRIN2A/SCN4B/GLRB/HTR1B/KCNK3/GABRP/KCNK9/ABCC9/KCNH3/CACNG4/CHRNA3	42
MF	GO:0005249	voltage-gated potassium channel activity	15/964	99/18522	0.000178025306196943	0.00895071678379072	0.00807880921689049	KCNA5/KCNB1/KCNJ14/KCNJ15/KCNN3/KCNC3/KCNA3/KCNA2/KCNMA1/KCNQ4/KCNE4/KCNK3/KCNK9/ABCC9/KCNH3	15
MF	GO:0005267	potassium channel activity	17/964	122/18522	0.000193785595426067	0.00923031388739949	0.00833117019671068	KCNA5/KCNB1/KCNJ14/KCNJ15/KCNMB1/KCNN3/KCNC3/KCNA3/GRIK5/KCNA2/KCNMA1/KCNQ4/KCNE4/KCNK3/KCNK9/ABCC9/KCNH3	17
MF	GO:0015079	potassium ion transmembrane transporter activity	20/964	158/18522	0.000209992343314043	0.00943227693993994	0.00851345961662506	KCNA5/SLC9A9/KCNB1/KCNJ14/KCNJ15/ATP1A2/KCNMB1/KCNN3/KCNC3/SLC9A4/KCNA3/GRIK5/KCNA2/KCNMA1/KCNQ4/KCNE4/KCNK3/KCNK9/ABCC9/KCNH3	20
MF	GO:0043177	organic acid binding	24/964	208/18522	0.000218870514628441	0.00943227693993994	0.00851345961662506	APOC1/PRR7/ACACB/CD36/S100A9/AKR1C1/GSTA1/S100A8/HBA1/PCK1/LCN12/FABP1/AKR1C2/RYR2/P3H2/OTC/FABP4/FOLR2/SIGLEC6/TM4SF5/GLRB/FCN1/GLDC/PTGDS	24
MF	GO:0033293	monocarboxylic acid binding	13/964	81/18522	0.000264559815909341	0.0108830287908161	0.00982289077251909	APOC1/PRR7/ACACB/CD36/S100A9/AKR1C1/GSTA1/S100A8/LCN12/FABP1/AKR1C2/FABP4/PTGDS	13
MF	GO:0031406	carboxylic acid binding	22/964	196/18522	0.000575973438775545	0.0226633026996464	0.0204556241871772	APOC1/PRR7/ACACB/CD36/S100A9/AKR1C1/GSTA1/S100A8/PCK1/LCN12/FABP1/AKR1C2/P3H2/OTC/FABP4/FOLR2/SIGLEC6/TM4SF5/GLRB/FCN1/GLDC/PTGDS	22
MF	GO:0019838	growth factor binding	17/964	135/18522	0.000647756018424339	0.0244257998614178	0.0220464329077757	IL1RN/CD36/FGFR4/GHR/TGFBR3/NKD2/PDGFRB/LTBP4/EPHA7/KIT/NRP2/LIFR/FGFBP1/CHRDL1/IL2RA/KL/NTRK3	17
MF	GO:0048306	calcium-dependent protein binding	12/964	79/18522	0.000752389292759015	0.0272364923978764	0.0245833301549893	ANXA1/S100B/S100A9/S100A8/TNNC1/CASQ2/VLDLR/CD177/MASP1/STMN2/S100A2/RAC3	12
MF	GO:0005504	fatty acid binding	9/964	49/18522	0.000845410260679733	0.0294267802275061	0.0265602575824888	APOC1/PRR7/CD36/S100A9/GSTA1/S100A8/FABP1/FABP4/PTGDS	9
MF	GO:0017116	single-stranded DNA helicase activity	6/964	23/18522	0.000919915085814182	0.0308341908393272	0.0278305694577702	RFC3/RFC4/CHTF18/MCM8/MCM7/PIF1	6
MF	GO:0036041	long-chain fatty acid binding	5/964	17/18522	0.00138342741718983	0.0447143504484569	0.0403586344262897	PRR7/S100A9/S100A8/FABP1/FABP4	5

## Sheet: KEGG_venn_enrich
Table S2 List of Gene Ontology (GO) terms and Kyoto Encyclopedia of Genes and Genomes (KEGG) pathways enriched by overlapping genes.
category	subcategory	ID	Description	GeneRatio	BgRatio	pvalue	p.adjust	qvalue	geneID	Count
NA	NA	hsa04820	Cytoskeleton in muscle cells	38/495	233/9521	2.28750278450472e-10	7.0683836041196e-08	6.01974416974928e-08	NEB/COMP/THBS2/TPM1/COL4A6/VCAN/ATP1B2/FHL1/MYL9/TNNC1/CSRP1/SGCA/TMOD1/DAAM2/ITGA8/TPM2/MYOM1/ATP1A2/DMD/PDLIM3/LMOD1/DCN/LDB3/ANK2/MYH11/ACTC1/ITGB7/ITGA7/COL6A3/FBLN1/ACTG2/ITGA9/TNNI2/FLNC/SYNPO2/DES/DTNA/THBS4	38
Human Diseases	Cardiovascular disease	hsa05414	Dilated cardiomyopathy	21/495	105/9521	7.64665621821127e-08	1.18140838571364e-05	1.00613897608043e-05	TPM1/TNNC1/SGCA/CACNB2/CACNA2D3/PLN/ITGA8/TPM2/DMD/ADCY5/ACTC1/ITGB7/RYR2/ITGA7/SLC8A1/ITGA9/SLC8A2/DES/DTNA/ADCY2/CACNG4	21
Organismal Systems	Circulatory system	hsa04261	Adrenergic signaling in cardiomyocytes	25/495	154/9521	3.25482136402197e-07	3.35246600494263e-05	2.85510645966839e-05	ADRB2/CREB3L3/TPM1/ATP1B2/TNNC1/CACNB2/CACNA2D3/PLN/SCN7A/TPM2/ATP1A2/PPP2R3A/ATP2B4/ADCY5/BVES/ACTC1/RYR2/POPDC2/ADRA1D/SLC8A1/AGTR1/SCN4B/SLC8A2/ADCY2/CACNG4	25
Human Diseases	Cardiovascular disease	hsa05410	Hypertrophic cardiomyopathy	19/495	99/9521	6.27233916556581e-07	4.84538200539959e-05	4.12653892471435e-05	TPM1/TNNC1/SGCA/CACNB2/CACNA2D3/ITGA8/TPM2/DMD/ACTC1/ITGB7/RYR2/ITGA7/SLC8A1/ITGA9/SLC8A2/DES/DTNA/CACNG4/IL6	19
Environmental Information Processing	Signal transduction	hsa04020	Calcium signaling pathway	32/495	254/9521	2.75608571102403e-06	0.000170326096941285	0.000145057142685475	HRH2/ADRB2/FGFR4/TNNC1/PDGFRB/PLN/ITPKB/RYR3/CASQ2/ATP2B4/CYSLTR1/FGF2/CACNA1H/MST1/ITPR1/PDE1C/RYR2/MYLK/CHRM2/ADRA1D/PTGER3/TACR2/PRKCB/SLC8A1/AGTR1/NTRK3/GRIN2A/PTGFR/SLC8A2/FGF10/ADCY2/TACR1	32
Environmental Information Processing	Signal transduction	hsa04022	cGMP-PKG signaling pathway	23/495	166/9521	1.51143344364545e-05	0.000704658802813111	0.000600118210537482	ADRB2/CREB3L3/ATP1B2/NPR1/PDE2A/MYL9/PLN/ATP1A2/KCNMB1/PDE5A/ATP2B4/ITPR1/ADCY5/MYLK/CNGA1/ADRA1D/KCNMA1/IRAG1/SLC8A1/AGTR1/PDE3A/SLC8A2/ADCY2	23
Environmental Information Processing	Signal transduction	hsa04024	cAMP signaling pathway	28/495	226/9521	1.5963144400297e-05	0.000704658802813111	0.000600118210537482	TIAM1/ADRB2/CREB3L3/GHRL/ATP1B2/NPR1/MYL9/PLN/ATP1A2/SUCNR1/MAPK10/ATP2B4/ADCY5/BVES/RYR2/HCAR2/POPDC2/CHRM2/CNGA1/VIPR2/PTGER3/PPP1R1B/PDE3A/GRIN2A/RAC3/HTR1B/ADCY2/HHIP	28
Human Diseases	Cardiovascular disease	hsa05412	Arrhythmogenic right ventricular cardiomyopathy	15/495	86/9521	3.16273771240354e-05	0.00122160744141587	0.00104037424750117	SGCA/CACNB2/CACNA2D3/ITGA8/CTNNA3/DMD/ITGB7/RYR2/ITGA7/SLC8A1/ITGA9/SLC8A2/DES/DTNA/CACNG4	15
Environmental Information Processing	Signaling molecules and interaction	hsa04512	ECM-receptor interaction	15/495	89/9521	4.79786219051847e-05	0.00164726601874467	0.00140288368143815	LAMC2/HMMR/COMP/THBS2/CD36/COL4A6/ITGA8/TNXB/ITGB7/ITGA7/COL6A3/ITGA9/RELN/VTN/THBS4	15
Organismal Systems	Circulatory system	hsa04270	Vascular smooth muscle contraction	19/495	134/9521	6.00956427585977e-05	0.00185695536124067	0.00158146428312099	NPR1/MYL9/PPP1R14A/KCNMB1/ACTA2/ITPR1/ADCY5/CALD1/MYH11/MYLK/ADRA1D/KCNMA1/IRAG1/PPP1R12B/PLA2G5/PRKCB/AGTR1/ACTG2/ADCY2	19
Metabolism	Xenobiotics biodegradation and metabolism	hsa00980	Metabolism of xenobiotics by cytochrome P450	13/495	79/9521	0.000194914650486675	0.0054753297273075	0.00466302991594916	CYP2D6/DHDH/GSTM5/ALDH3A1/AKR1C1/GSTA1/AKR7A3/ADH1B/HPGDS/UGT1A10/UGT2B15/CYP2B6/ADH6	13
NA	NA	hsa04517	IgSF CAM signaling	31/495	302/9521	0.00021524203541302	0.00554248241188527	0.00472022007484693	NCAM1/EPB41L3/CADM3/JAM2/MYL9/NTN1/MAPK10/SORBS1/NRP2/MAGI2/ANK2/MYH11/JAM3/SLAMF7/MYLK/KCNA2/LY9/PTPRS/LRFN5/NFASC/TUBA1A/CD84/CLMP/CNTN1/PRKCB/NLGN1/MPDZ/SLIT2/NTRK3/SLITRK5/RIMS1	31
Metabolism	Xenobiotics biodegradation and metabolism	hsa00982	Drug metabolism - cytochrome P450	12/495	73/9521	0.000344589692120807	0.00765526520743165	0.00651955817359194	CYP2D6/GSTM5/ALDH3A1/GSTA1/FMO2/ADH1B/MAOB/HPGDS/UGT1A10/UGT2B15/CYP2B6/ADH6	12
Cellular Processes	Cellular community - eukaryotes	hsa04510	Focal adhesion	23/495	203/9521	0.000346840494835091	0.00765526520743165	0.00651955817359194	EMP1/LAMC2/COMP/THBS2/COL4A6/MYL9/PDGFRB/ITGA8/TNXB/MAPK10/FLNA/ITGB7/MYLK/ITGA7/CAV1/COL6A3/PPP1R12B/PRKCB/ITGA9/RAC3/RELN/VTN/THBS4	23
NA	NA	hsa04518	Integrin signaling	19/495	154/9521	0.000385528280895266	0.00794188258644249	0.00676365405079415	LAMC2/COMP/THBS2/COL4A6/LIMS2/PDGFRB/ITGA8/TNXB/FERMT2/FLNA/ITGB7/ITGA7/COL6A3/ITGA9/MADCAM1/RAC3/RELN/VTN/THBS4	19
Organismal Systems	Endocrine system	hsa04925	Aldosterone synthesis and secretion	14/495	98/9521	0.000510209460445462	0.00939630142649444	0.00800230065278014	CREB3L3/ATP1B2/NPR1/PDE2A/ATP1A2/ATP2B4/CACNA1H/ITPR1/ADCY5/PRKCB/AGTR1/KCNK3/KCNK9/ADCY2	14
Organismal Systems	Circulatory system	hsa04260	Cardiac muscle contraction	13/495	87/9521	0.000516948622169597	0.00939630142649444	0.00800230065278014	TPM1/ATP1B2/TNNC1/CACNB2/CACNA2D3/TPM2/ATP1A2/CASQ2/ACTC1/RYR2/SLC8A1/SLC8A2/CACNG4	13
Environmental Information Processing	Signaling molecules and interaction	hsa04514	Cell adhesion molecule (CAM) interaction	19/495	160/9521	0.000624413967124697	0.0107191064356406	0.00912885916848972	LRRC4/NCAM1/VCAN/CADM3/JAM2/NEGR1/ITGA8/CLDN1/CLDN16/JAM3/ITGB7/PTPRS/NFASC/NRXN3/CNTN1/NLGN1/ITGA9/MADCAM1/SLITRK5	19
Organismal Systems	Digestive system	hsa04974	Protein digestion and absorption	14/495	105/9521	0.00102859362498825	0.0167281805327037	0.0142464490995603	COL4A6/ATP1B2/SLC15A1/MME/SLC7A9/COL21A1/COL23A1/ATP1A2/COL8A1/COL6A3/SLC8A1/CPA3/SLC8A2/COL17A1	14
Cellular Processes	Cell growth and death	hsa04110	Cell cycle	18/495	158/9521	0.00139519488045457	0.021555760903023	0.0183578273744022	TRIP13/NDC80/SGO1/DBF4/ORC6/CDK1/MAD2L1/TTK/PKMYT1/CCNE1/CHEK2/CDKN2A/MCM7/CCNB1/CDC25C/AURKB/CDT1/CDC20	18
Organismal Systems	Excretory system	hsa04961	Endocrine and other factor-regulated calcium reabsorption	9/495	53/9521	0.00147593401527053	0.0217173147961235	0.0184954137251946	ATP1B2/PTH1R/ATP1A2/ATP2B4/PRKCB/SLC8A1/KL/SLC8A2/KLK1	9
Metabolism	Amino acid metabolism	hsa00350	Tyrosine metabolism	7/495	37/9521	0.0025979432583202	0.0364892939464064	0.0310758762956962	ALDH3A1/AOC3/ADH1B/MAOB/TYRP1/TPO/ADH6	7
Organismal Systems	Digestive system	hsa04972	Pancreatic secretion	13/495	106/9521	0.00327584535645664	0.0440102702237001	0.0374810681516778	ATP1B2/ATP1A2/ATP2B4/ITPR1/ADCY5/RYR2/TRPC1/KCNMA1/PLA2G5/PRKCB/SLC26A3/CPA3/ADCY2	13
NA	NA	hsa04082	Neuroactive ligand signaling	20/495	199/9521	0.00352070202000365	0.045329038507547	0.0386041888158295	GNG7/P2RY14/HRH2/ADRB2/P2RY1/GNAO1/ADCY5/GRIK5/CHRM2/ADRA1D/CHRNB4/TACR2/PRKCB/GRIN2A/GLRB/HTR1B/GABRP/ADCY2/TACR1/CHRNA3	20
Human Diseases	Infectious disease: parasitic	hsa05144	Malaria	8/495	50/9521	0.0039311506272287	0.0485890217525467	0.0413805329181969	COMP/THBS2/CD36/HBA1/GYPC/ACKR1/IL6/THBS4	8
