# Supplementary material
Source: Research Square preprint supplement (doi:10.21203/rs.3.rs-9566914/v1)
Supplement: Supplementary file 3 [file 838db90f50b9ed50679b29fa.xlsx]

## Sheet: Drug_padjust
Table S4 List of 47 therapeutic agents existing differential sensitivity between two risk groups.
	drug	pvalue	p.adj
6	Afatinib	3.96203122135684e-10	7.48823900836443e-08
9	NU7441	1.69433006277931e-06	0.000320228381865289
22	AZD8055	7.95053837005009e-06	0.00150265175193947
23	PD0325901	1.19706507516242e-12	2.26245299205697e-10
25	5-Fluorouracil	1.71275017551938e-07	3.23709783173163e-05
26	Dasatinib	2.15935245831998e-06	0.000408117614622476
27	Paclitaxel	0.00015016986648876	0.0283821047663757
28	Crizotinib	9.92656294080445e-10	1.87612039581204e-07
32	Irinotecan	1.05498450561667e-05	0.00199392071561551
33	Oxaliplatin	5.47627528350705e-11	1.03501602858283e-08
36	Tozasertib	0.000211442192849727	0.0399625744485983
39	Erlotinib	7.51936028012104e-18	1.42115909294288e-15
41	MK-1775	1.76302698104093e-05	0.00333212099416737
52	BMS-345541	3.34574910913573e-06	0.000632346581626653
56	Trametinib	4.09840743552729e-08	7.74599005314658e-06
57	Dabrafenib	1.36588094553895e-05	0.00258151498706861
63	AZD1332	2.34350777473748e-06	0.000442922969425383
69	Sapitinib	4.33822913172122e-12	8.19925305895311e-10
71	LCL161	2.10652526516004e-10	3.98133275115248e-08
72	Lapatinib	4.27318119888377e-08	8.07631246589033e-06
76	EPZ5676	6.34997100445054e-05	0.0120014451984115
77	SCH772984	1.97710073540165e-13	3.73672038990912e-11
80	Entinostat	5.94431063125355e-06	0.00112347470930692
83	VE-822	1.21878819180069e-05	0.00230350968250331
84	WZ4003	2.28746416775153e-05	0.00432330727705039
95	ML323	8.66537097189781e-06	0.00163775511368869
104	Eg5_9814	9.92854667934516e-05	0.0187649532239623
105	ERK_2440	8.42302985452439e-07	0.000159195264250511
106	ERK_6604	1.21254942823681e-08	2.29171841936757e-06
111	TAF1_5496	1.41531711502225e-06	0.000267494934739204
112	ULK1_4989	8.45572205373655e-05	0.0159813146815621
114	Selumetinib	1.11155481792242e-07	2.10083860587337e-05
115	IGF1R_3801	4.60767151774609e-06	0.000870849916854012
120	Acetalax	1.44126624780738e-08	2.72399320835596e-06
121	Oxaliplatin.1	2.7961079061693e-07	5.28464394265998e-05
126	Dactinomycin	1.69113360849256e-05	0.00319624252005094
129	Fulvestrant.1	3.49120655395107e-05	0.00659838038696752
133	Dihydrorotenone	1.46190669572659e-06	0.000276300365492325
135	Elephantin	2.072221767104e-05	0.00391649913982657
145	Ulixertinib	3.37740646452055e-09	6.38329821794384e-07
148	Dactinomycin.1	6.08106294042247e-08	1.14932089573985e-05
151	AZD3759	7.12874226254526e-10	1.34733228762105e-07
154	AZD8186	0.000137835657973798	0.0260509393570477
166	Savolitinib	4.96262025076686e-09	9.37935227394936e-07
180	VX-11e	7.73459537568302e-10	1.46183852600409e-07
188	BMS-754807	1.97520151864809e-11	3.73313087024488e-09
189	JQ1	3.41548036726836e-09	6.45525789413719e-07
