# Supplementary material
Source: Research Square preprint supplement (doi:10.21203/rs.3.rs-9566914/v1)
Supplement: Supplementary file 4 [file 8fac6ecafedf2ef48dbb3485.xlsx]

## Sheet: Sheet1
Table S1 List of primer sequences.
primer	sequence
GAPDH	F:5‘-CTGGGCTACACTGAGCACC-3’
	R:5‘-AAGTGGTCGTTGAGGGCAATG-3’
VTN	F:5‘-TCCCTGCCCATAGCTACAGT-3’
	R:5‘-GTGCTGGAACTGGTACTCCC-3’
GRB14	F:5‘-CAAACCCCTTCTCCCCACG-3’
	R:5‘-AGGGAAGTGGTCATTGTCGC-3’
ASPN	F:5‘-TTGAAGGGGTGACGGTGTTC-3’
	R:5‘-GGCCCAGCCTTTGTAGTTCT-3’
