# Supplementary material
Source: Research Square preprint supplement (doi:10.21203/rs.3.rs-9566914/v1)
Supplement: Supplementary file 5 [file 9549e8995e4859edeb42873d.xlsx]

## Sheet: Sig_GSVA_pvalue0.05
Table S3 List of KEGG pathways in gene set variation analysis (GSVA).
	logFC	AveExpr	t	pvalue	padj	B
KEGG_PROTEASOME	-0.0141361	0.405351330178087	-4.48022	9.84777326654466e-06	3.81601214078606e-05	1.80145421978831
KEGG_AMYOTROPHIC_LATERAL_SCLEROSIS_ALS	-0.0133182	0.191940845362792	-6.28177	9.06595044198181e-10	9.36814879004787e-09	10.8133071845512
KEGG_FRUCTOSE_AND_MANNOSE_METABOLISM	-0.0356135	0.13749620225578	-7.39417	8.98438347206232e-13	1.39257943816966e-11	17.6001906091656
KEGG_TGF_BETA_SIGNALING_PATHWAY	0.0341128303949786	0.14393553630741	9.63009924697523	8.31072701459697e-20	1.54579522471504e-17	33.6009059130103
KEGG_NUCLEOTIDE_EXCISION_REPAIR	-0.0183298	0.148827333701834	-4.51911	8.27729362308694e-06	3.27569492317908e-05	1.96790519033286
KEGG_OOCYTE_MEIOSIS	-0.0122636	0.202835410114146	-5.01353	8.1730750682033e-07	4.60664231116913e-06	4.19587558513208
KEGG_MELANOGENESIS	0.025842863544197	0.10112465479591	8.74467775663049	7.06458991317813e-17	2.62802744770226e-15	26.9242784711337
KEGG_BASE_EXCISION_REPAIR	-0.023348	0.159176426254754	-5.49748	7.03211711088415e-08	5.23189513049781e-07	6.57187510405363
KEGG_ARRHYTHMOGENIC_RIGHT_VENTRICULAR_CARDIOMYOPATHY_ARVC	0.0326501699800315	0.127388124723145	7.44037121175119	6.62237270279667e-13	1.11978302065471e-11	17.9003804596803
KEGG_CALCIUM_SIGNALING_PATHWAY	0.0221884876712267	-0.0172189	6.34002871544025	6.44570877812086e-10	7.052363721944e-09	11.1469220858255
KEGG_PYRUVATE_METABOLISM	-0.0163188	0.184677493341302	-4.04485	6.32899579625134e-05	0.00018986987388754	0.0270541323600479
KEGG_ALZHEIMERS_DISEASE	-0.00861653	0.300663247574683	-4.06522	5.82161706449474e-05	0.00017751160229443	0.106391636196882
KEGG_RENAL_CELL_CARCINOMA	0.00887210663760396	0.219847261858727	4.07299607899844	5.63839620020695e-05	0.000174790282206415	0.136762792387225
KEGG_OLFACTORY_TRANSDUCTION	0.0162147746139772	0.0595030789895843	4.61357672523453	5.39955217912029e-06	2.18329718547038e-05	2.37768448932528
KEGG_FOLATE_BIOSYNTHESIS	-0.031333	0.0952603949190961	-4.61851	5.2794257972747e-06	2.18216266287354e-05	2.39928384668163
KEGG_ALANINE_ASPARTATE_AND_GLUTAMATE_METABOLISM	-0.0156188	0.080731696966209	-4.08945	5.26851010837902e-05	0.000166092013586186	0.201222635134453
KEGG_VASCULAR_SMOOTH_MUSCLE_CONTRACTION	0.0429372491417144	0.120880205043576	8.47623188175938	5.03100772967434e-16	1.33681062531347e-14	24.984059564351
KEGG_DNA_REPLICATION	-0.0277232	0.1775926150733	-4.1026	4.98959869942789e-05	0.000160011268636825	0.252913022667926
KEGG_PRION_DISEASES	0.020834007912236	0.283075504401756	5.58216247868329	4.49405989832884e-08	3.48289642120485e-07	7.0069177737765
KEGG_FOCAL_ADHESION	0.033024135745901	0.218361357493169	8.49845098602827	4.28300886669626e-16	1.32773274867584e-14	25.1430898246873
KEGG_TIGHT_JUNCTION	0.0102212126024961	0.202766889227191	4.66660343099508	4.23491651497168e-06	1.79021470860166e-05	2.61101818443337
KEGG_MAPK_SIGNALING_PATHWAY	0.0112647347739895	0.119949822843061	5.15931817454241	3.97916098300534e-07	2.31288732137186e-06	4.89164433923791
KEGG_O_GLYCAN_BIOSYNTHESIS	-0.0282273	0.109444041945187	-4.15999	3.92882447955304e-05	0.000128203746174889	0.480236823958828
KEGG_HYPERTROPHIC_CARDIOMYOPATHY_HCM	0.0448210904567303	0.0703339709318269	9.13335035087627	3.84312936344231e-18	2.38274020533423e-16	29.8042935503036
KEGG_CELL_ADHESION_MOLECULES_CAMS	0.027282163149183	0.098736568300632	4.68810512209852	3.83512887647625e-06	1.65891621168508e-05	2.7063105791495
KEGG_HOMOLOGOUS_RECOMBINATION	-0.0256622	-0.0122708	-4.71066	3.45488441129782e-06	1.53002023928903e-05	2.80668679524521
KEGG_REGULATION_OF_ACTIN_CYTOSKELETON	0.0186403893218069	0.208045368742775	6.83161869386765	3.29687415177119e-11	4.08812394819628e-10	14.0598846742023
KEGG_ONE_CARBON_POOL_BY_FOLATE	-0.0371998	0.0405437007288448	-5.64933	3.13848764929769e-08	2.53808131638856e-07	7.35602232741427
KEGG_AXON_GUIDANCE	0.0112249009978724	0.107254624906058	4.21365910323511	3.13403290334968e-05	0.000104094664289829	0.695462798241717
KEGG_PATHWAYS_IN_CANCER	0.00929646754568741	0.157395616350668	4.75232783644222	2.84570027021474e-06	1.2909762201462e-05	2.99325929776776
KEGG_CITRATE_CYCLE_TCA_CYCLE	-0.0189401	0.335822146658413	-5.23903	2.66574657890371e-07	1.59944794734223e-06	5.2794147565566
KEGG_AMINO_SUGAR_AND_NUCLEOTIDE_SUGAR_METABOLISM	-0.020274	0.143136635270586	-5.68568	2.58073491059965e-08	2.18189406077971e-07	7.54638257738221
KEGG_COMPLEMENT_AND_COAGULATION_CASCADES	0.047528230014152	0.122246038303197	7.58409747075646	2.54180420290214e-13	4.72775581739798e-12	18.8431424652207
KEGG_PENTOSE_PHOSPHATE_PATHWAY	-0.0189567	0.310947895927801	-4.77808	2.52240542082747e-06	1.17291852068478e-05	3.10931076856095
KEGG_BASAL_CELL_CARCINOMA	0.0346512216329098	-0.0298828	7.5856437911278	2.51557413504325e-13	4.72775581739798e-12	18.8533581774241
KEGG_GLYOXYLATE_AND_DICARBOXYLATE_METABOLISM	-0.0284204	0.192784298752164	-5.7084	2.28244320710704e-08	2.02159255486624e-07	7.66591252298874
KEGG_ECM_RECEPTOR_INTERACTION	0.0544160856699776	0.220575568949634	9.20581783909043	2.21380287675268e-18	2.05883667537999e-16	30.3502377536695
KEGG_PANTOTHENATE_AND_COA_BIOSYNTHESIS	-0.0234559	-0.0107932	-4.81457	2.1243437561694e-06	1.01314856063464e-05	3.27466624576641
KEGG_LEUKOCYTE_TRANSENDOTHELIAL_MIGRATION	0.01847919308505	0.200168746361841	4.82322964847002	2.0391671929921e-06	9.98118678675081e-06	3.31407739249237
KEGG_PATHOGENIC_ESCHERICHIA_COLI_INFECTION	0.0095940188234207	0.365135017374039	4.82447861156361	2.02715800878343e-06	9.98118678675081e-06	3.31976647976032
KEGG_GAP_JUNCTION	0.0232997100986017	0.153834659999936	6.93505219370603	1.7268664517376e-11	2.2942654287371e-10	14.6946007978083
KEGG_RNA_DEGRADATION	-0.0163732	0.192825034001664	-4.86196	1.69688494218111e-06	8.76723886793571e-06	3.49110481430305
KEGG_P53_SIGNALING_PATHWAY	-0.0132293	0.183670224703724	-4.35697	1.69418062887363e-05	5.729410854009e-05	1.28241467070043
KEGG_GLYCOSAMINOGLYCAN_BIOSYNTHESIS_CHONDROITIN_SULFATE	0.0455503736824311	0.0178193716329242	7.98521493927802	1.64091708085312e-14	3.81513221298349e-13	21.5439257961777
KEGG_PYRIMIDINE_METABOLISM	-0.0202929	0.145154752311844	-5.77798	1.56308069393388e-08	1.45366504535851e-07	8.0344931471329
KEGG_WNT_SIGNALING_PATHWAY	0.0168845076277778	0.108812165352181	7.31533966290378	1.5071412755834e-12	2.15637136352701e-11	17.0912375710794
KEGG_GLYCOSPHINGOLIPID_BIOSYNTHESIS_LACTO_AND_NEOLACTO_SERIES	-0.0393831	0.0504929624742481	-6.5845	1.50063828169361e-10	1.74449200246882e-09	12.5738822540427
KEGG_MELANOMA	0.0145238080360972	0.104809672090585	4.89054188921197	1.48057671345514e-06	7.86820767721876e-06	3.62254447944264
KEGG_TERPENOID_BACKBONE_BIOSYNTHESIS	-0.0340395	0.154260005596362	-4.39602	1.42850219429077e-05	4.92039644700153e-05	1.44546956250043
KEGG_HEDGEHOG_SIGNALING_PATHWAY	0.0237363713800498	-0.0658149	5.36990561522608	1.3663173193922e-07	8.47116738023167e-07	5.92719553701509
KEGG_NEUROACTIVE_LIGAND_RECEPTOR_INTERACTION	0.0262944829781231	-0.21054	5.80299746351182	1.36298073058643e-08	1.33428639941619e-07	8.16791415664435
KEGG_MISMATCH_REPAIR	-0.0278268	0.139202439019785	-4.41355	1.32268245699616e-05	4.64186673587333e-05	1.51908166728002
KEGG_AMINOACYL_TRNA_BIOSYNTHESIS	-0.0218729	0.197250955272342	-5.37763	1.3129052585855e-07	8.42070269299666e-07	5.96587412960225
KEGG_GLYCEROLIPID_METABOLISM	-0.0140395	0.0560807933542634	-4.43459	1.20556537056766e-05	4.3122145947228e-05	1.60778839514631
KEGG_ADHERENS_JUNCTION	0.0102515550875801	0.243331785326207	4.43913515008068	1.18162367878386e-05	4.30945106379997e-05	1.62698528067321
KEGG_PEROXISOME	-0.0177019	0.119450344717585	-5.40218	1.15634363683237e-07	7.68142558752933e-07	6.08906056686141
KEGG_GLYCEROPHOSPHOLIPID_METABOLISM	-0.0152761	0.0867740389909943	-5.41309	1.09274483347396e-07	7.52779774170952e-07	6.14395160407108
KEGG_GLYCOSYLPHOSPHATIDYLINOSITOL_GPI_ANCHOR_BIOSYNTHESIS	-0.0184702	0.0211467373732101	-4.45882	1.08303417132812e-05	4.02888711734061e-05	1.71038177509548
KEGG_DILATED_CARDIOMYOPATHY	0.0480681487658774	0.0537185234431166	8.99671658776578	1.07925759725563e-17	5.01854782723869e-16	28.7825232250949
KEGG_LIMONENE_AND_PINENE_DEGRADATION	-0.021716	0.228212588326566	-4.96165	1.0516580080595e-06	5.75318792644314e-06	3.95249201269938
KEGG_GLYCOLYSIS_GLUCONEOGENESIS	-0.019271	0.248365189370153	-5.42213	1.04261292240832e-07	7.45869244492107e-07	6.18952521638162
KEGG_UBIQUITIN_MEDIATED_PROTEOLYSIS	-0.00757404	0.197782363311173	-4.46927	1.03394397923623e-05	3.92476694159058e-05	1.75479588507054
KEGG_BETA_ALANINE_METABOLISM	0.00753608243184614	0.170241984615061	1.96747758434333	0.0498465557221675	0.0766236311101087	-6.06716
KEGG_NEUROTROPHIN_SIGNALING_PATHWAY	0.00404712470880311	0.208888432806533	2.02375364262218	0.0436866283138842	0.0677142738865205	-5.95584
KEGG_ACUTE_MYELOID_LEUKEMIA	0.00580902825695956	0.185796032874864	2.03001365076927	0.0430431080542891	0.0672774630092249	-5.94327
KEGG_ARGININE_AND_PROLINE_METABOLISM	-0.00770473	0.211628560275947	-2.0901	0.0372655467200346	0.0587406075417494	-5.82067
KEGG_PROXIMAL_TUBULE_BICARBONATE_RECLAMATION	-0.00957716	0.21503880087277	-2.1093	0.0355646806106527	0.0565387230220633	-5.78075
KEGG_RETINOL_METABOLISM	-0.0159162	-0.0168633	-2.11396	0.0351622662953513	0.056380875266684	-5.77101
KEGG_SNARE_INTERACTIONS_IN_VESICULAR_TRANSPORT	-0.00483835	0.0961279247326395	-2.16246	0.0311985616141462	0.0504602822628799	-5.66836
KEGG_NOD_LIKE_RECEPTOR_SIGNALING_PATHWAY	-0.00868872	0.12892648341678	-2.19628	0.0286682601234983	0.0467745296751815	-5.59545
KEGG_CYTOKINE_CYTOKINE_RECEPTOR_INTERACTION	0.0127638676679177	0.00186901655431139	2.23897187769245	0.0257290695626053	0.0423505038818105	-5.50184
KEGG_VASOPRESSIN_REGULATED_WATER_REABSORPTION	0.00519542951381441	0.240758663903519	2.24136948445633	0.025572052808933	0.0423505038818105	-5.49653
KEGG_STEROID_HORMONE_BIOSYNTHESIS	-0.0165226	-0.0925138	-2.24629	0.0252526727730956	0.0423152895116737	-5.48562
KEGG_HEMATOPOIETIC_CELL_LINEAGE	0.0179215300810461	0.0410530010421471	2.28014317993536	0.0231459736745724	0.0391377373042769	-5.40989
KEGG_PROSTATE_CANCER	0.00516352425863525	0.181460673431162	2.28543006316699	0.0228312305215828	0.038959714468022	-5.39797
KEGG_PORPHYRIN_AND_CHLOROPHYLL_METABOLISM	-0.00901209	0.123329379013649	-2.35247	0.0191525766759807	0.032984993164189	-5.24443
KEGG_PHENYLALANINE_METABOLISM	0.0146681804047802	0.142717078643517	2.35637229239843	0.01895536187165	0.0329504421320272	-5.23535
KEGG_PARKINSONS_DISEASE	-0.00744337	0.362488547908689	-2.4211	0.0159358064549311	0.0279628301945017	-5.08277
KEGG_ARACHIDONIC_ACID_METABOLISM	0.0143627226909357	0.0199468239351771	2.64234962987425	0.00856956535034749	0.0151803729063298	-4.53102
KEGG_GLIOMA	0.00749225482808574	0.181454918212751	2.66851430808958	0.00794122438437085	0.0142025743797402	-4.46269
KEGG_EPITHELIAL_CELL_SIGNALING_IN_HELICOBACTER_PYLORI_INFECTION	-0.00534726	0.210759565570763	-2.70618	0.00710929001682885	0.0128381353701958	-4.36319
KEGG_HUNTINGTONS_DISEASE	-0.00561223	0.313747111199915	-2.71823	0.00686034180398518	0.0125100350543259	-4.33109
KEGG_MATURITY_ONSET_DIABETES_OF_THE_YOUNG	-0.0333803	0.12122951771643	-2.80321	0.00531591922598698	0.00978971263399583	-4.10069
KEGG_NOTCH_SIGNALING_PATHWAY	0.00796647056472566	0.237718629176997	2.88926192584889	0.00408014205418487	0.00758906422078386	-3.86048
KEGG_SELENOAMINO_ACID_METABOLISM	-0.00881609	0.169598336412908	-2.98952	0.00297373382059589	0.00558701505687712	-3.57183
KEGG_VEGF_SIGNALING_PATHWAY	0.00715018751454734	0.12640383500438	2.9970730747626	0.00290272737361875	0.00550925807646008	-3.54971
KEGG_PRIMARY_BILE_ACID_BIOSYNTHESIS	0.0189289935182675	-0.0998165	3.10691665694044	0.00203089771361601	0.00389429870858328	-3.22192
KEGG_STEROID_BIOSYNTHESIS	-0.0246726	0.168412613519766	-3.12929	0.00188597300732822	0.00365407270169842	-3.15377
KEGG_LYSINE_DEGRADATION	-0.00926202	0.123407361309197	-3.15473	0.00173283587607587	0.00339271024158012	-3.07572
KEGG_PROGESTERONE_MEDIATED_OOCYTE_MATURATION	-0.00808125	0.0969323527558047	-3.1562	0.00172435194575693	0.00339271024158012	-3.0712
KEGG_RNA_POLYMERASE	-0.0128312	0.170182818058987	-3.19693	0.00150388729854818	0.00300777459709636	-2.94494
KEGG_PURINE_METABOLISM	-0.00642592	0.0765997898487071	-3.20926	0.00144250489869449	0.00291636859953452	-2.90643
KEGG_SPLICEOSOME	-0.00899948	0.336388419753286	-3.23499	0.0013217617911659	0.0027016230017237	-2.82559
KEGG_SYSTEMIC_LUPUS_ERYTHEMATOSUS	0.0161581844721506	0.13482364527856	3.23870941870932	0.00130509390089408	0.00269719406184777	-2.81385
KEGG_NITROGEN_METABOLISM	-0.0223448	-0.0160307	-3.24651	0.00127079312400257	0.0026558148434211	-2.78919
KEGG_SPHINGOLIPID_METABOLISM	-0.0119675	0.170288866817895	-3.29605	0.00107170729544974	0.00226519951083695	-2.6313
KEGG_RIBOFLAVIN_METABOLISM	-0.0104849	0.11924839470008	-3.30616	0.00103479218170894	0.00221231431951566	-2.59878
KEGG_GLYCOSPHINGOLIPID_BIOSYNTHESIS_GANGLIO_SERIES	0.0134760823283599	-0.0398455	3.31461778283984	0.00100484367734156	0.00217326655797129	-2.57153
KEGG_N_GLYCAN_BIOSYNTHESIS	-0.00769554	0.235871221455221	-3.32002	0.000986136539270952	0.00215789878005173	-2.55408
KEGG_DRUG_METABOLISM_OTHER_ENZYMES	-0.0140523	0.145017394130337	-3.34804	0.000894195817415427	0.00198000502427702	-2.46316
KEGG_APOPTOSIS	-0.0103115	0.143271915598123	-3.36059	0.000855649389286506	0.0019174793543047	-2.4222
KEGG_NON_HOMOLOGOUS_END_JOINING	-0.0125731	0.119211978623843	-3.36335	0.000847371177244379	0.0019174793543047	-2.41315
KEGG_LONG_TERM_DEPRESSION	0.0105112714890647	0.131264366063863	3.44078580200413	0.000643650204280974	0.00147801158020076	-2.15705
KEGG_THYROID_CANCER	-0.00795404	0.289665708384834	-3.44163	0.00064169536129783	0.00147801158020076	-2.15421
KEGG_VALINE_LEUCINE_AND_ISOLEUCINE_BIOSYNTHESIS	-0.0163297	0.221811839737438	-3.51162	0.000498261390924798	0.00117312175584826	-1.91796
KEGG_CARDIAC_MUSCLE_CONTRACTION	0.0084059119602149	0.23704713510381	3.5206313868099	0.00048215129011025	0.00114974538410906	-1.88723
KEGG_GALACTOSE_METABOLISM	-0.0133962	0.196659063026194	-3.52651	0.000471908648726933	0.00113993517744428	-1.86715
KEGG_OXIDATIVE_PHOSPHORYLATION	-0.0119739	0.362376733761393	-3.53229	0.000462032560670951	0.00113076389848417	-1.84736
KEGG_FATTY_ACID_METABOLISM	-0.015255	0.189429429822311	-3.53343	0.00046010227795774	0.00113076389848417	-1.84344
KEGG_CELL_CYCLE	-0.0154236	0.202197165274492	-3.56395	0.000411267112125553	0.00103372544399126	-1.7384
KEGG_TAURINE_AND_HYPOTAURINE_METABOLISM	0.0281465866353311	-0.0612205	3.57351561144972	0.000396997586821072	0.00101152809792766	-1.70533
KEGG_RENIN_ANGIOTENSIN_SYSTEM	0.0265086184655439	0.0392477549355453	3.64019410271594	0.000309678450582182	0.000800002664003971	-1.47236
KEGG_PROTEIN_EXPORT	-0.0092891	0.346271015814502	-3.66838	0.000278496852828168	0.000729583304592101	-1.37268
KEGG_CYTOSOLIC_DNA_SENSING_PATHWAY	-0.0172353	0.130275238526842	-3.71378	0.000234404477865001	0.00062284618404129	-1.21061
KEGG_CYSTEINE_AND_METHIONINE_METABOLISM	-0.0107145	0.221274749603241	-3.71979	0.000229087567272858	0.000617540398735532	-1.18902
KEGG_RIG_I_LIKE_RECEPTOR_SIGNALING_PATHWAY	-0.0103521	0.128832986737628	-3.7265	0.00022327829192244	0.000610731798493733	-1.16484
KEGG_VIRAL_MYOCARDITIS	0.0199970345977566	0.261817476385062	3.7646389618903	0.000192845199828026	0.000535361301015117	-1.02683
KEGG_PROPANOATE_METABOLISM	-0.0175496	0.149020696567144	-3.79869	0.00016901651835861	0.000476319279010627	-0.902489
KEGG_LINOLEIC_ACID_METABOLISM	-0.0393294	-0.0718194	-3.81463	0.000158844171224961	0.000454538705351427	-0.843927
KEGG_BUTANOATE_METABOLISM	-0.0220233	0.110344330533528	-3.89087	0.000117698750895107	0.000342061994788903	-0.560732
KEGG_VALINE_LEUCINE_AND_ISOLEUCINE_DEGRADATION	-0.0177837	0.153513260455702	-3.9232	0.000103494623949126	0.000305555556421229	-0.439071
